# Supplementary material for: Fixed-charge phosphine ligands to explore gas-phase coinage metal-mediated decarboxylation reactions
Source: Royal Society of Chemistry journal article supplement (doi:10.1039/c3dt32285h), 2013-01-01
Supplement: c3dt32285h.pdf [file c3dt32285h.pdf]

*Dalton Trans. Manuscript*

Version: 21 Feb 2013

## Using fixed-charge phosphine ligands to explore coinage metal-mediated decarboxylation reactions.

Krista Vikse,<sup>a,b</sup> George N. Khairallah,<sup>a,b</sup> J. Scott McIndoe,<sup>\* c</sup> and Richard A. J. O'Hair<sup>\* a,b</sup>

(a) School of Chemistry, The University of Melbourne, Victoria 3010, Australia

(b) Bio21 Institute of Molecular Science and Biotechnology, The University of Melbourne, Victoria 3010, Australia.

(c) Department of Chemistry, University of Victoria, P. O. Box 3065, Victoria, BC, V8W 3V6, Canada.

## Supporting Information

**Complete citation for reference 43:** Gaussian 09, Revision B.01, M. J. Frisch, G. W. Trucks, H. B. Schlegel, G. E. Scuseria, M. A. Robb, J. R. Cheeseman, G. Scalmani, V. Barone, B. Mennucci, G. A. Petersson, H. Nakatsuji, M. Caricato, X. Li, H. P. Hratchian, A. F. Izmaylov, J. Bloino, G. Zheng, J. L. Sonnenberg, M. Hada, M. Ehara, K. Toyota, R. Fukuda, J. Hasegawa, M. Ishida, T. Nakajima, Y. Honda, O. Kitao, H. Nakai, T. Vreven, J. A. Montgomery, Jr., J. E. Peralta, F. Ogliaro, M. Bearpark, J. J. Heyd, E. Brothers, K. N. Kudin, V. N. Staroverov, T. Keith, R. Kobayashi, J. Normand, K. Raghavachari, A. Rendell, J. C. Burant, S. S. Iyengar, J. Tomasi, M. Cossi, N. Rega, J. M. Millam, M. Klene, J. E. Knox, J. B. Cross, V. Bakken, C. Adamo, J. Jaramillo, R. Gomperts, R. E. Stratmann, O. Yazyev, A. J. Austin, R. Cammi, C. Pomelli, J. W. Ochterski, R. L. Martin, K. Morokuma, V. G. Zakrzewski, G. A. Voth, P. Salvador, J. J. Dannenberg, S. Dapprich, A. D. Daniels, O. Farkas, J. B. Foresman, J. V. Ortiz, J. Cioslowski, and D. J. Fox, Gaussian, Inc., Wallingford CT, 2010.

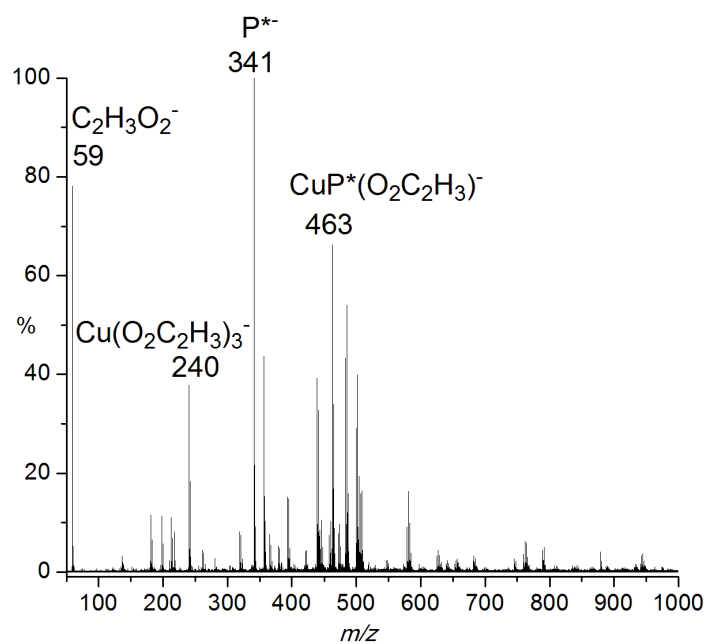

**Figure S1:** ESI(-)-MS of  $P^*$ PPN and copper(II) acetate in methanol.  $P^{*-} = P(C_6H_5)_2(C_6H_4SO_3)^-$ .

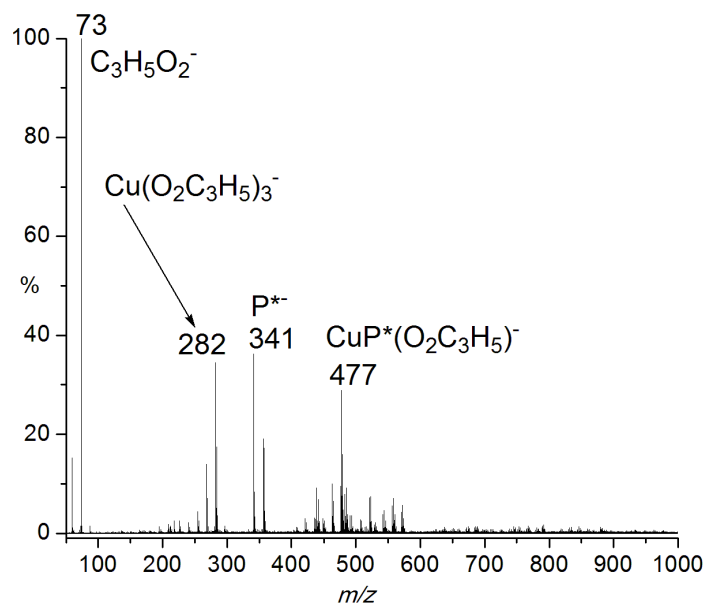

**Figure S2:** ESI(-)-MS of  $P^*$ PPN, copper(II) acetate, and propionic acid in methanol.  $P^{*-} = P(C_6H_5)_2(C_6H_4SO_3)^-$ .

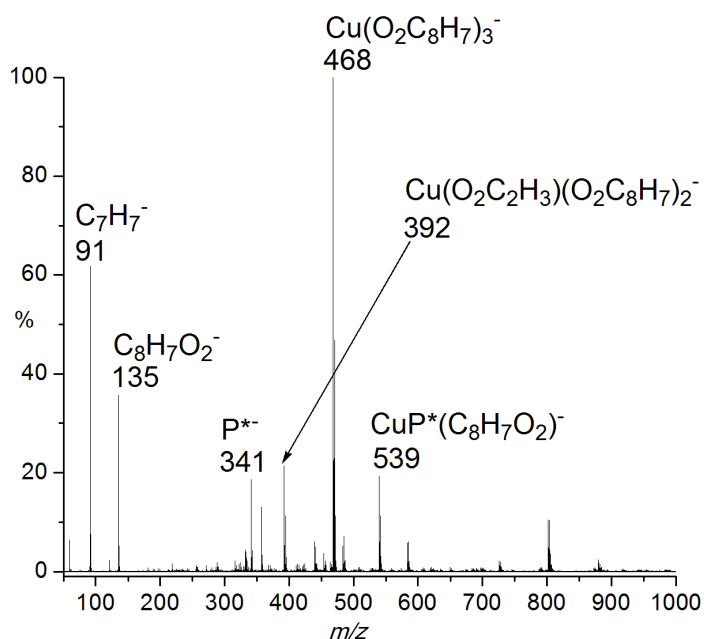

**Figure S3:** ESI(-)-MS of P\*PPN, copper(II) acetate, and phenylacetic acid in methanol. P\*<sup>-</sup> =  $\text{P}(\text{C}_6\text{H}_5)_2(\text{C}_6\text{H}_4\text{SO}_3)^-$ .

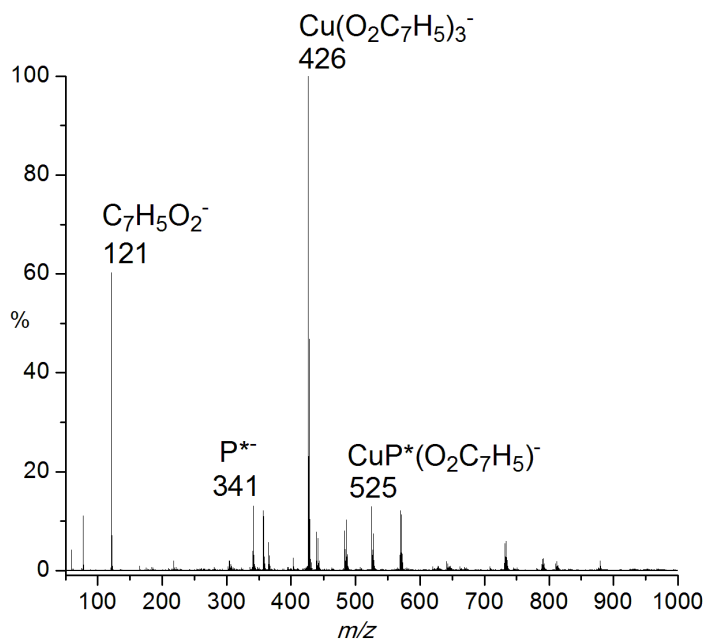

**Figure S4:** ESI(-)-MS of P\*PPN, copper(II) acetate, and benzoic acid in methanol. P\*<sup>-</sup> =  $\text{P}(\text{C}_6\text{H}_5)_2(\text{C}_6\text{H}_4\text{SO}_3)^-$ .

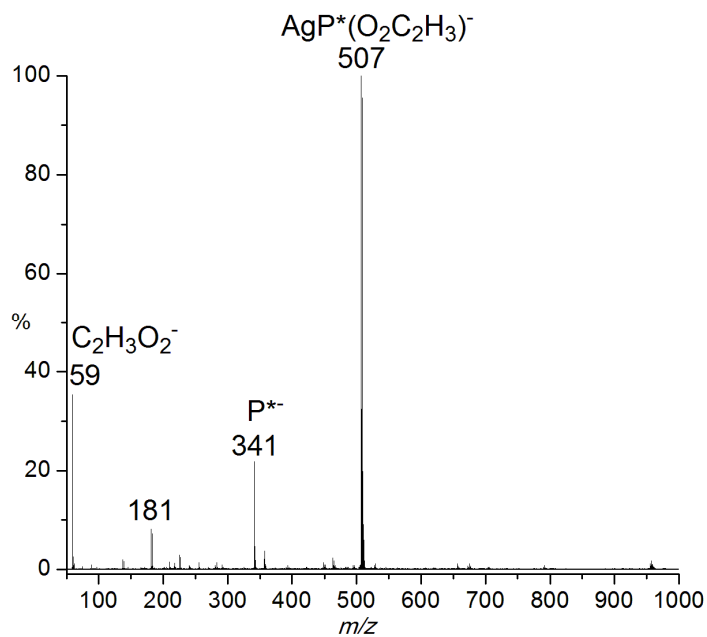

**Figure S5:** ESI(-)-MS of P\*PPN and silver(I) acetate in methanol.  $\text{P}^* = \text{P}(\text{C}_6\text{H}_5)_2(\text{C}_6\text{H}_4\text{SO}_3)^-$ .

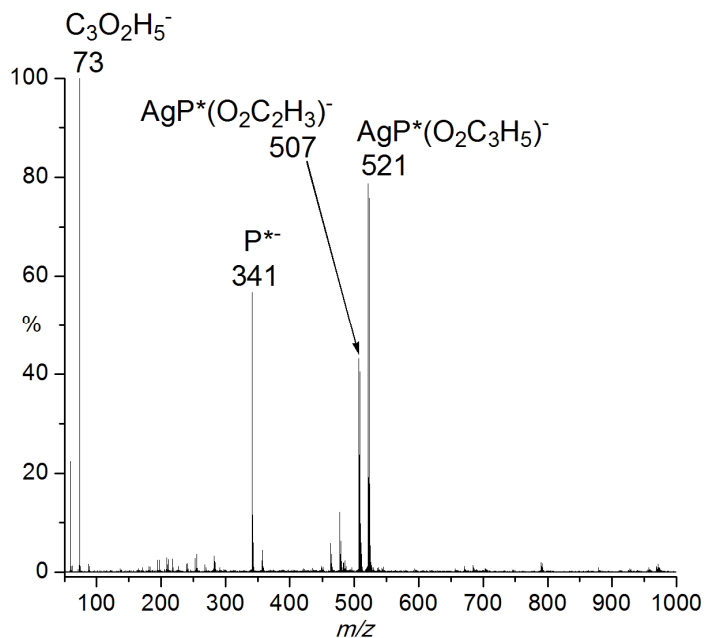

**Figure S6:** ESI(-)-MS of P\*PPN, silver(I) acetate, and propionic acid in methanol.  $\text{P}^* = \text{P}(\text{C}_6\text{H}_5)_2(\text{C}_6\text{H}_4\text{SO}_3)^-$ .

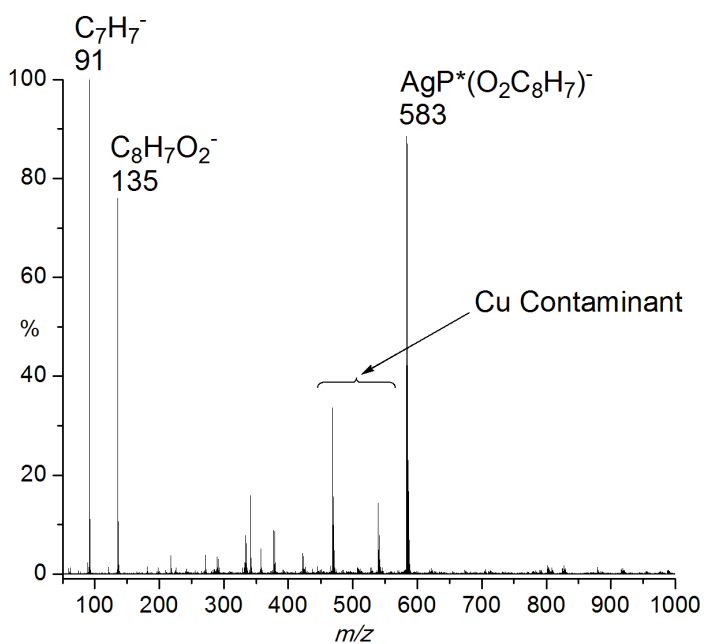

**Figure S7:** ESI(-)-MS of P\*PPN, silver(I) acetate, and phenylacetic acid in methanol. P\*<sup>-</sup> = P(C<sub>6</sub>H<sub>5</sub>)<sub>2</sub>(C<sub>6</sub>H<sub>4</sub>SO<sub>3</sub>)<sup>-</sup>.

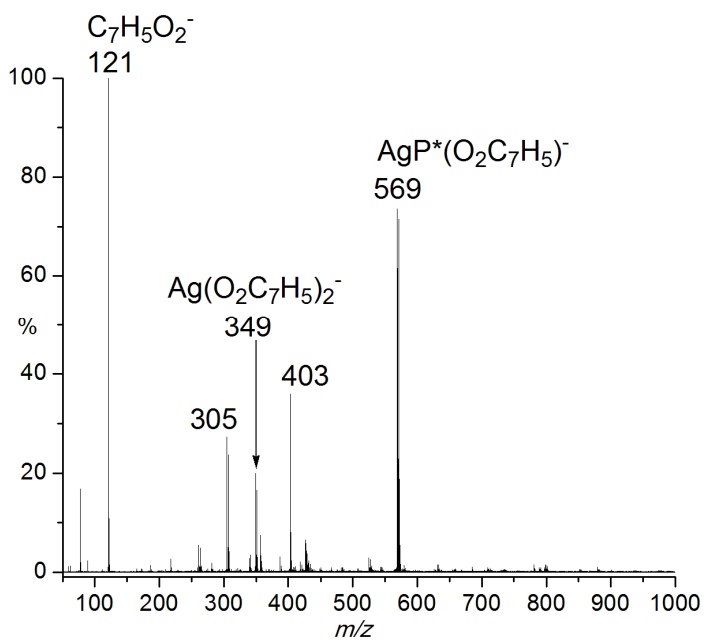

**Figure S8:** ESI(-)-MS of P\*PPN, silver(I) acetate, and benzoic acid in methanol. P\*<sup>-</sup> = P(C<sub>6</sub>H<sub>5</sub>)<sub>2</sub>(C<sub>6</sub>H<sub>4</sub>SO<sub>3</sub>)<sup>-</sup>.

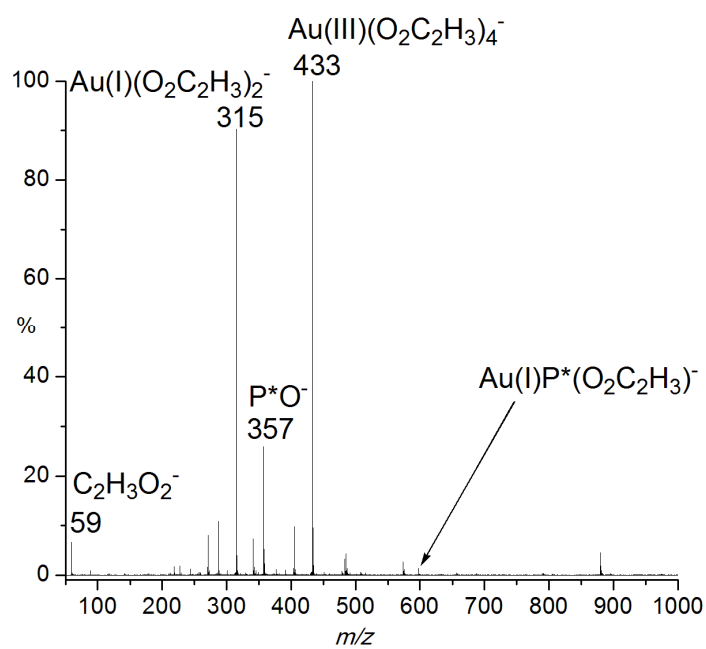

**Figure S9:** ESI(-)-MS of P\*PPN and gold(III) acetate in methanol.  $\text{P}^* = \text{P}(\text{C}_6\text{H}_5)_2(\text{C}_6\text{H}_4\text{SO}_3)^-$ .

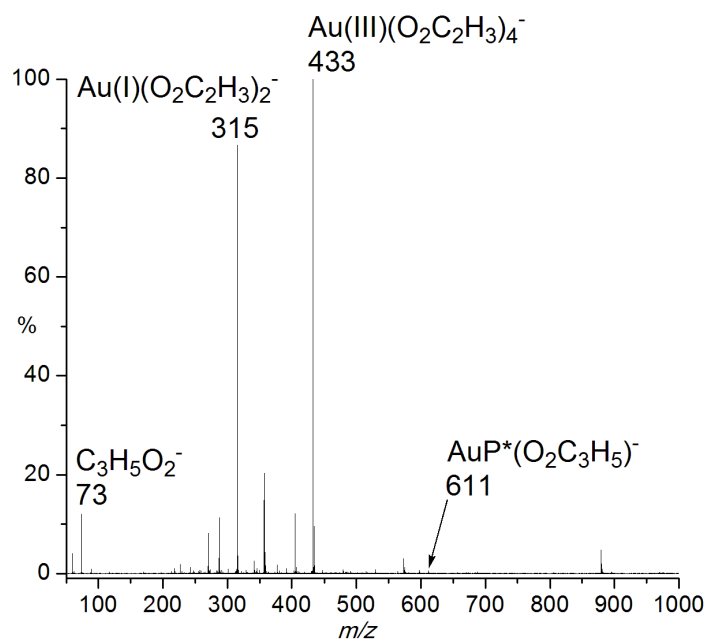

**Figure S10:** ESI(-)-MS of P\*PPN, gold(III) acetate, and propionic acid in methanol.  $\text{P}^* = \text{P}(\text{C}_6\text{H}_5)_2(\text{C}_6\text{H}_4\text{SO}_3)^-$ .

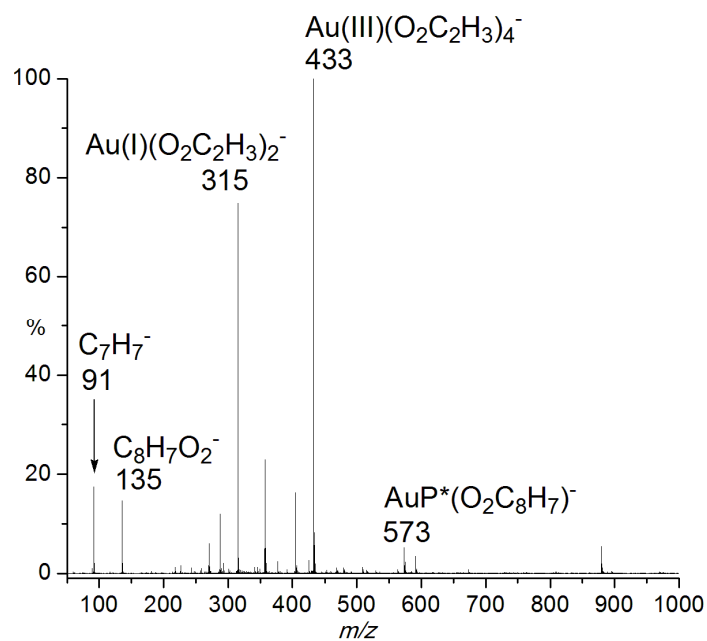

**Figure S11:** ESI(-)-MS of P\*PPN, gold(III) acetate, and phenylacetic acid in methanol. P\*<sup>-</sup> =  $\text{P}(\text{C}_6\text{H}_5)_2(\text{C}_6\text{H}_4\text{SO}_3)^-$ .

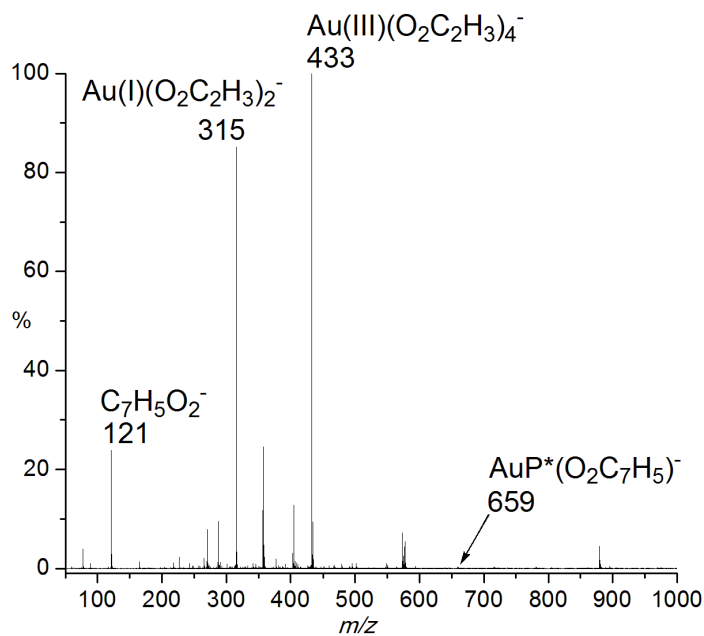

**Figure S12:** ESI(-)-MS of P\*PPN, gold(III) acetate, and benzoic acid in methanol. P\*<sup>-</sup> =  $\text{P}(\text{C}_6\text{H}_5)_2(\text{C}_6\text{H}_4\text{SO}_3)^-$ .

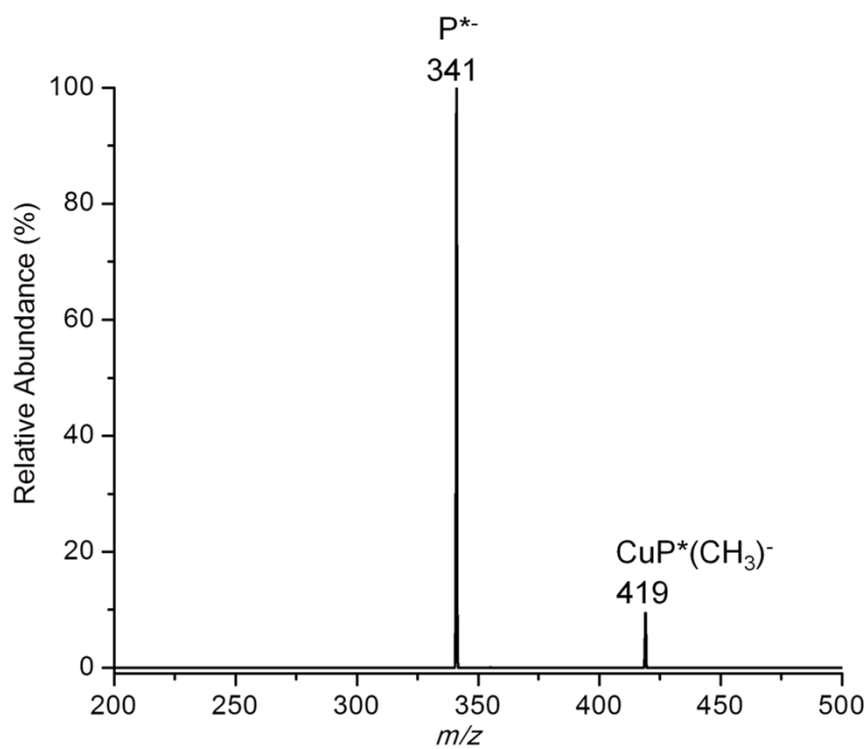

**Figure S13:** CID of  $\text{CuP}^*(\text{CH}_3)^-$ .  $\text{P}^* = \text{P}(\text{C}_6\text{H}_5)_2(\text{C}_6\text{H}_4\text{SO}_3)^-$ .

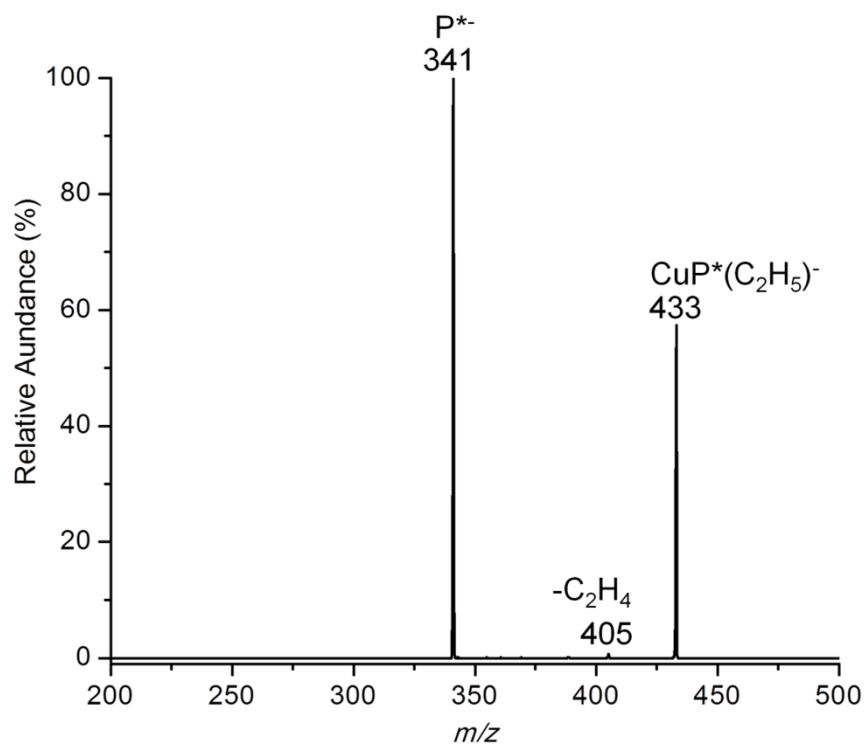

**Figure S14:** CID of  $\text{CuP}^*(\text{C}_2\text{H}_5)^-$ .  $\text{P}^* = \text{P}(\text{C}_6\text{H}_5)_2(\text{C}_6\text{H}_4\text{SO}_3)^-$ .



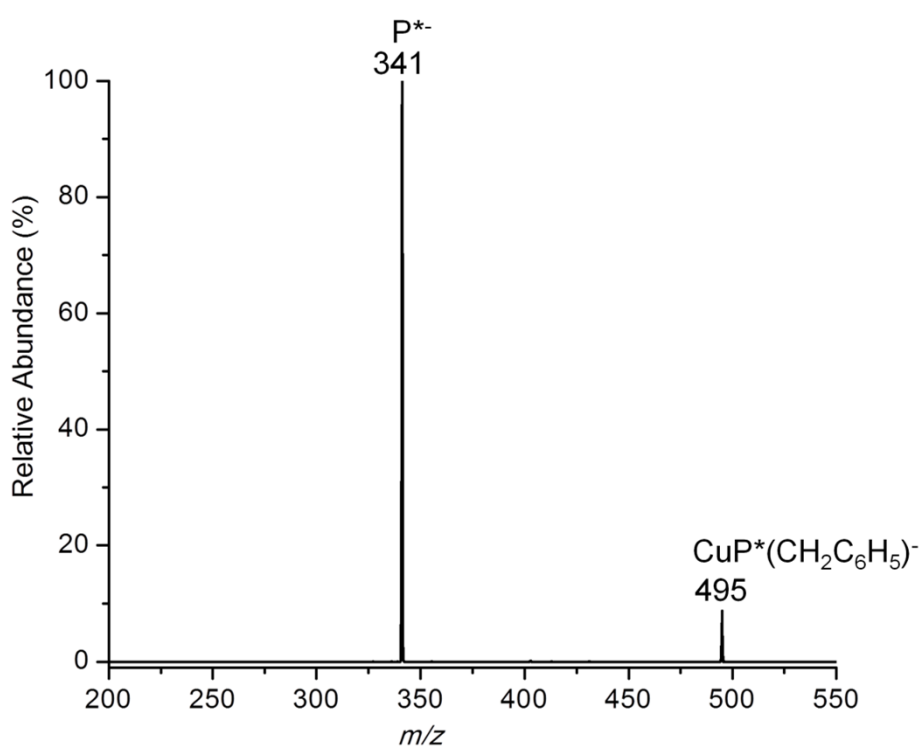

**Figure S15:** CID of  $\text{CuP}^*(\text{CH}_2\text{C}_6\text{H}_5)^-$ .  $\text{P}^{*-} = \text{P}(\text{C}_6\text{H}_5)_2(\text{C}_6\text{H}_4\text{SO}_3)^-$ .

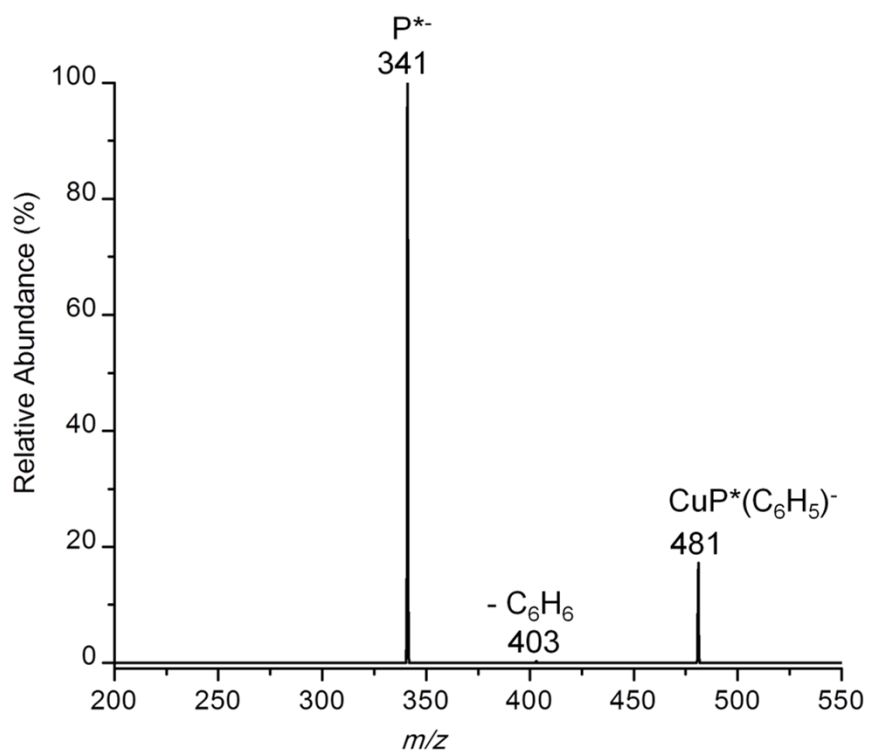

**Figure S16:** CID of  $\text{CuP}^*(\text{C}_6\text{H}_5)^-$ .  $\text{P}^{*-} = \text{P}(\text{C}_6\text{H}_5)_2(\text{C}_6\text{H}_4\text{SO}_3)^-$ .

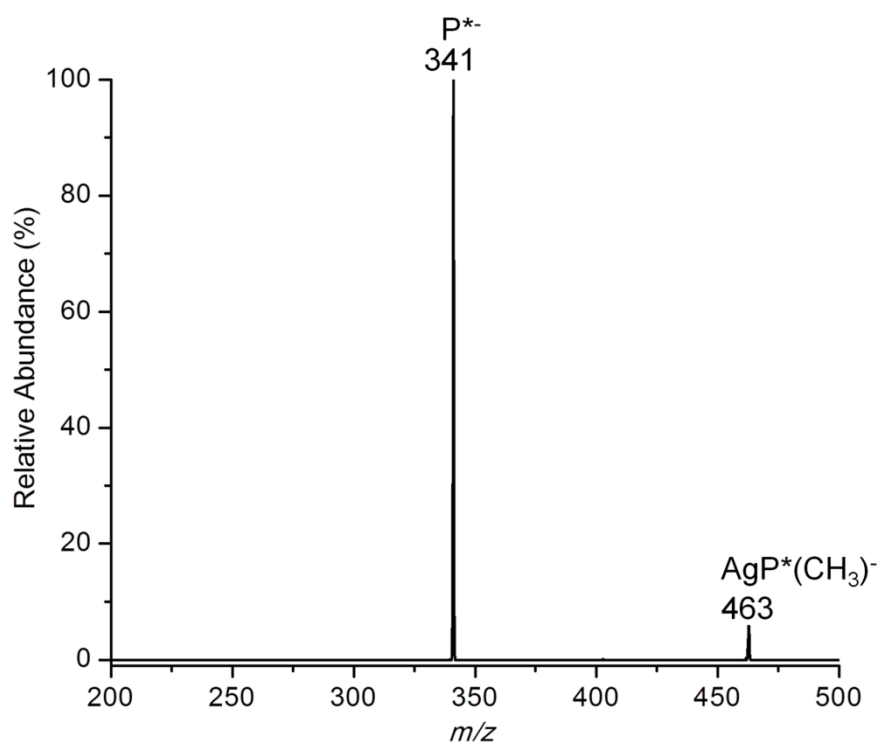

**Figure S17:** CID of  $\text{AgP}^*(\text{CH}_3)^-$ .  $\text{P}^* = \text{P}(\text{C}_6\text{H}_5)_2(\text{C}_6\text{H}_4\text{SO}_3)^-$ .

Note:  $\text{AgP}^*(\text{C}_2\text{H}_5)^-$  was too small to isolate for CID

**Figure S18:** CID of  $\text{AgP}^*(\text{C}_2\text{H}_5)^-$ .  $\text{P}^* = \text{P}(\text{C}_6\text{H}_5)_2(\text{C}_6\text{H}_4\text{SO}_3)^-$ .

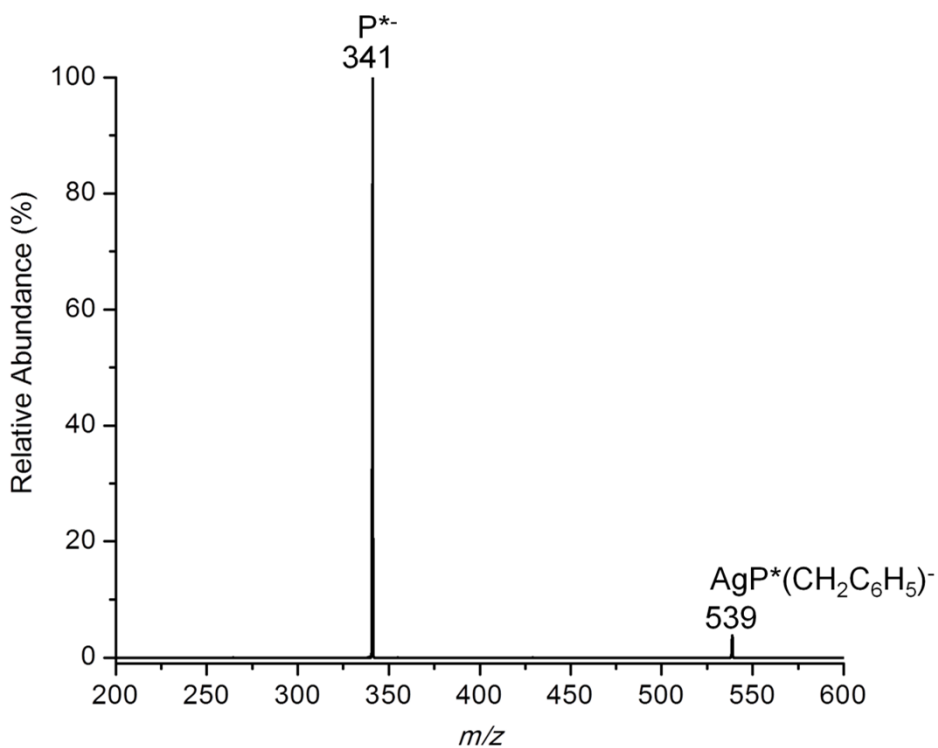

**Figure S19:** CID of  $\text{AgP}^*(\text{CH}_2\text{C}_6\text{H}_5)^-$ .  $\text{P}^{*-} = \text{P}(\text{C}_6\text{H}_5)_2(\text{C}_6\text{H}_4\text{SO}_3)^-$ .

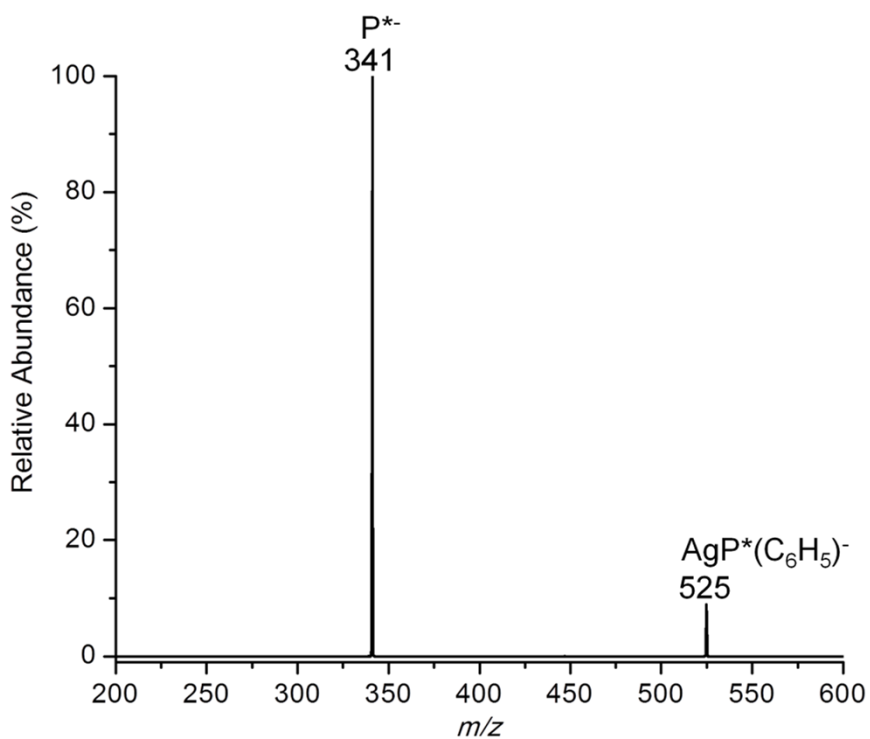

**Figure S20:** CID of  $\text{AgP}^*(\text{C}_6\text{H}_5)^-$ .  $\text{P}^{*-} = \text{P}(\text{C}_6\text{H}_5)_2(\text{C}_6\text{H}_4\text{SO}_3)^-$ .

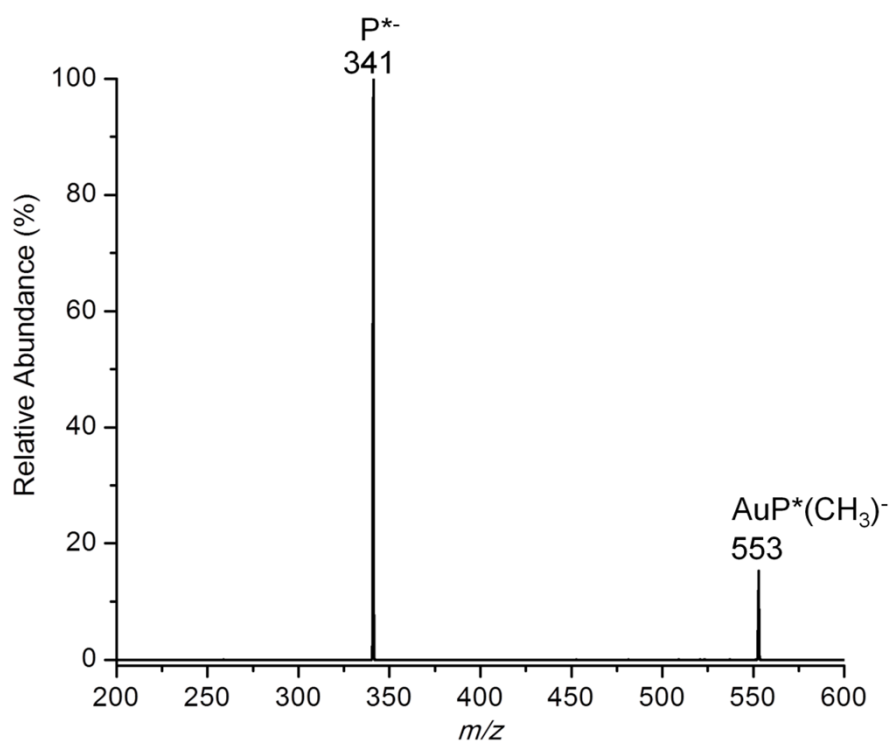

**Figure S21:** CID of  $\text{AuP}^*(\text{CH}_3)^-$ .  $\text{P}^{*-} = \text{P}(\text{C}_6\text{H}_5)_2(\text{C}_6\text{H}_4\text{SO}_3)^-$ .

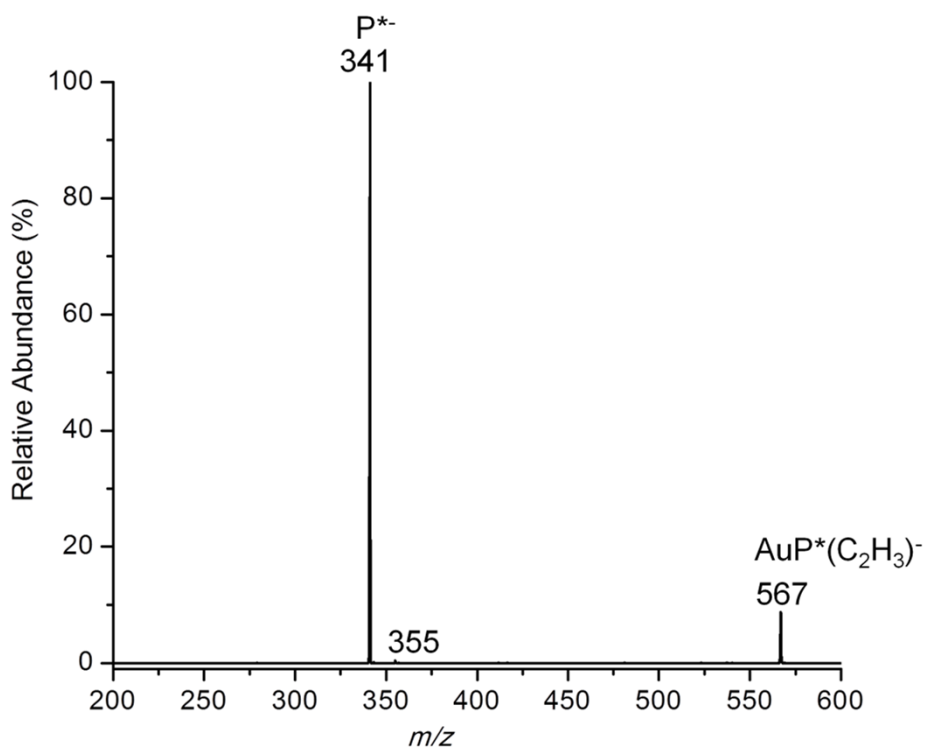

**Figure S22:** CID of  $\text{AuP}^*(\text{C}_2\text{H}_5)^-$ .  $\text{P}^{*-} = \text{P}(\text{C}_6\text{H}_5)_2(\text{C}_6\text{H}_4\text{SO}_3)^-$ .

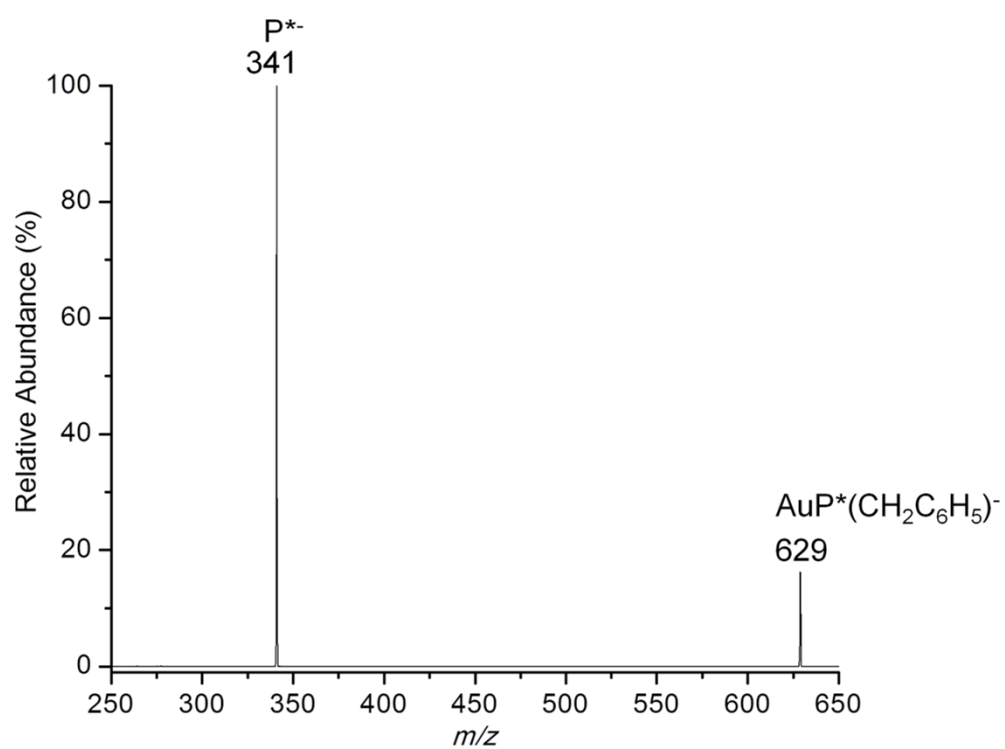

**Figure S23:** CID of  $\text{AuP}^*(\text{CH}_2\text{C}_6\text{H}_5)^-$ .  $\text{P}^* = \text{P}(\text{C}_6\text{H}_5)_2(\text{C}_6\text{H}_4\text{SO}_3)^-$ .

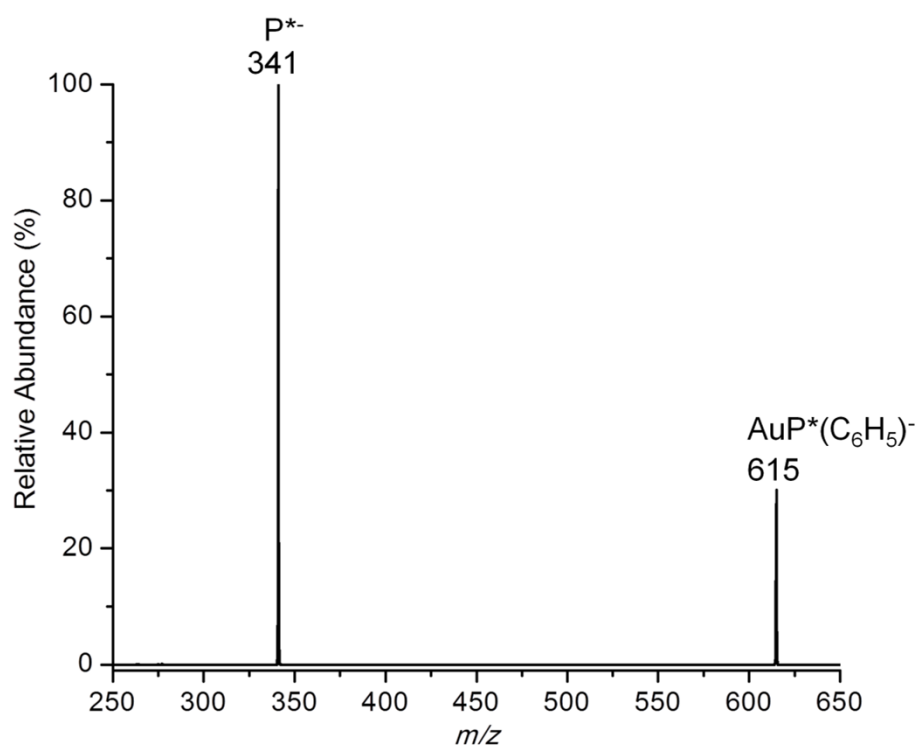

**Figure S24:** CID of  $\text{AuP}^*(\text{C}_6\text{H}_5)^-$ .  $\text{P}^* = \text{P}(\text{C}_6\text{H}_5)_2(\text{C}_6\text{H}_4\text{SO}_3)^-$ .

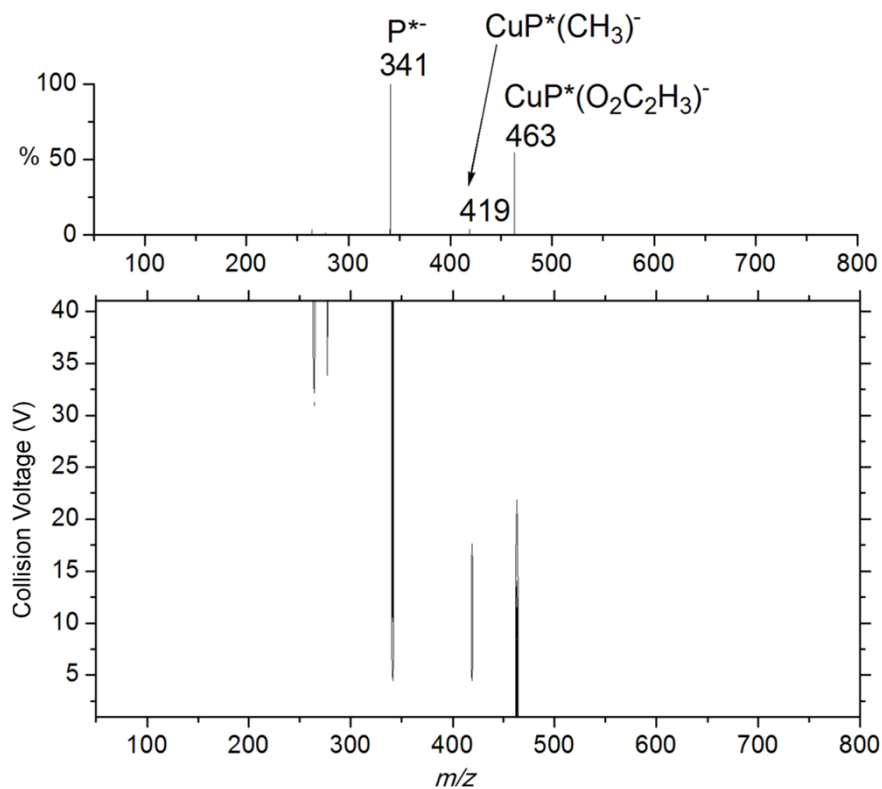

**Figure S25:** Energy-dependent CID of  $\text{CuP}^*(\text{O}_2\text{C}_2\text{H}_3)^-$  (**1a**).  $\text{P}^* = \text{P}(\text{C}_6\text{H}_5)_2(\text{C}_6\text{H}_4\text{SO}_3)^-$ .

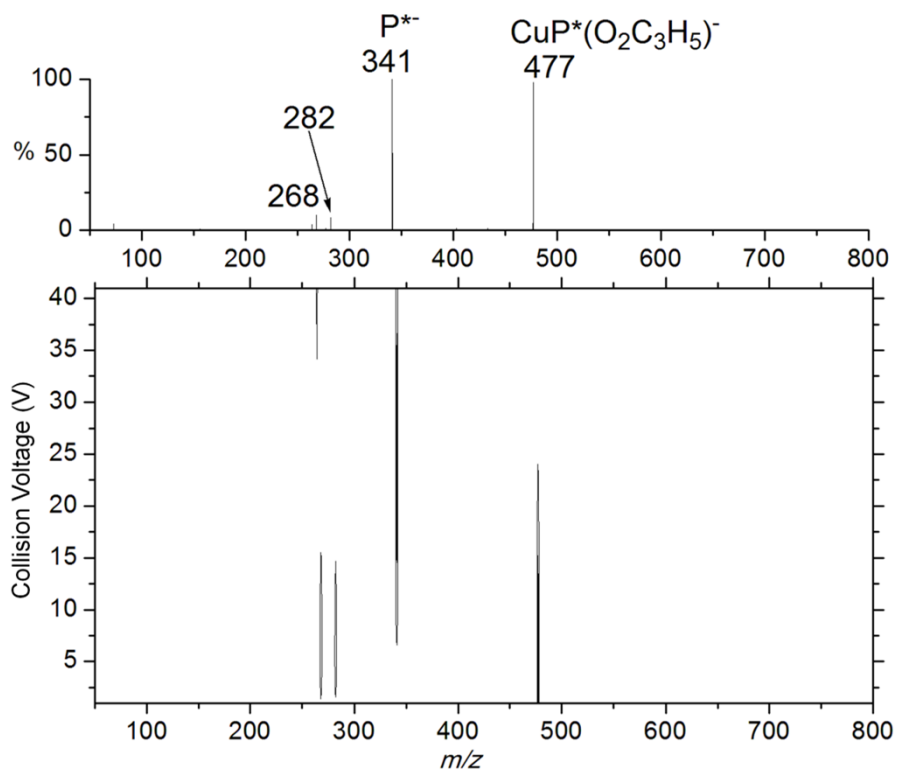

**Figure S26:** Energy-dependent CID of  $\text{CuP}^*(\text{O}_2\text{C}_3\text{H}_5)^-$  (**2a**).  $\text{P}^* = \text{P}(\text{C}_6\text{H}_5)_2(\text{C}_6\text{H}_4\text{SO}_3)^-$ .

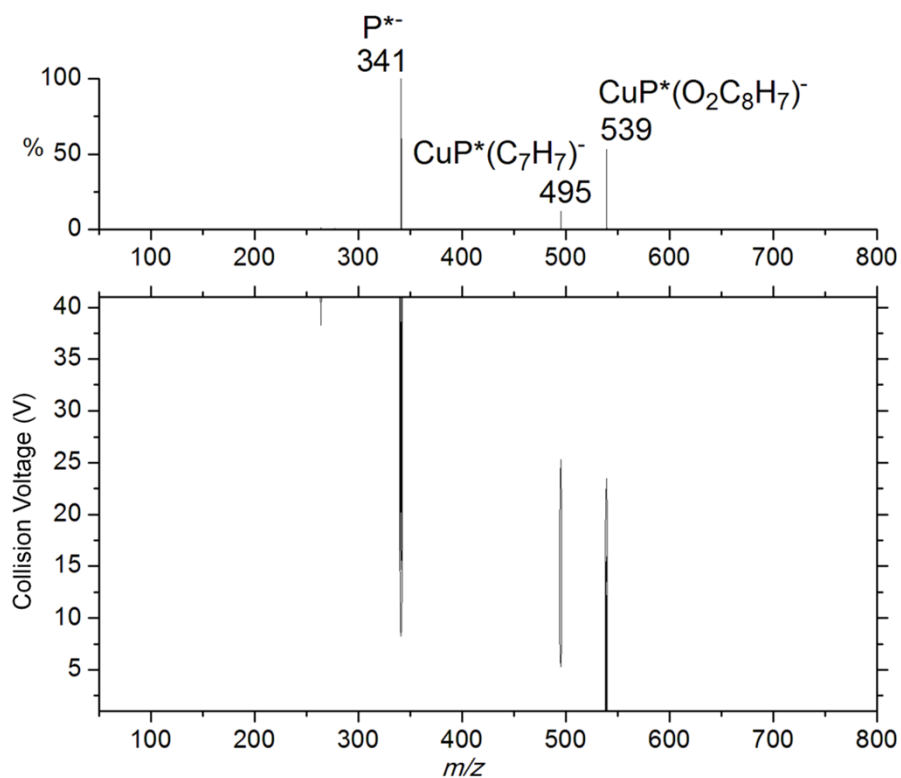

**Figure S27:** Energy-dependent CID of  $\text{CuP}^*(\text{O}_2\text{C}_8\text{H}_7)^-$  (**3a**).  $\text{P}^* = \text{P}(\text{C}_6\text{H}_5)_2(\text{C}_6\text{H}_4\text{SO}_3)^-$ .

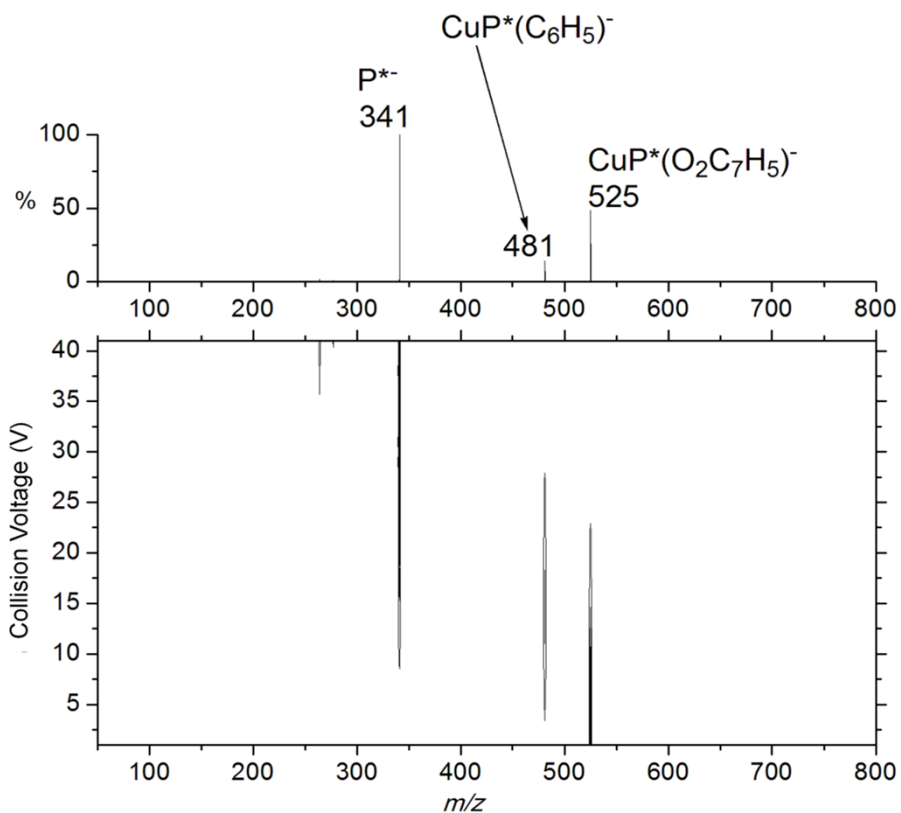

**Figure S28:** Energy-dependent CID of  $\text{CuP}^*(\text{O}_2\text{C}_7\text{H}_5)^-$  (**4a**).  $\text{P}^* = \text{P}(\text{C}_6\text{H}_5)_2(\text{C}_6\text{H}_4\text{SO}_3)^-$ .

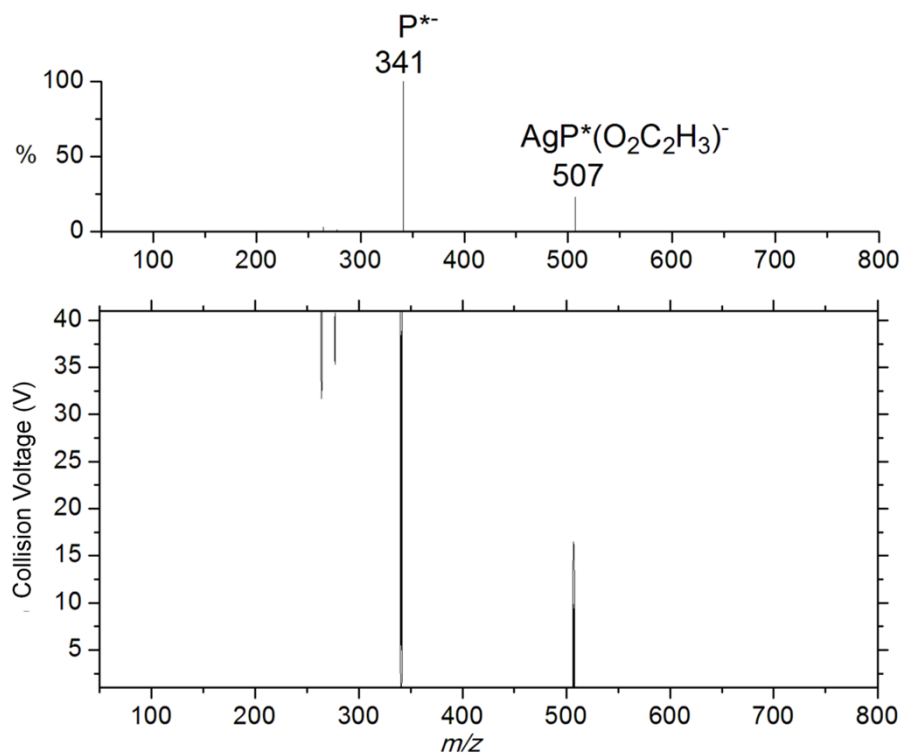

**Figure S29:** Energy-dependent CID of  $\text{AgP}^*(\text{O}_2\text{C}_2\text{H}_3)^-$  (**1b**).  $\text{P}^* = \text{P}(\text{C}_6\text{H}_5)_2(\text{C}_6\text{H}_4\text{SO}_3)^-$ .

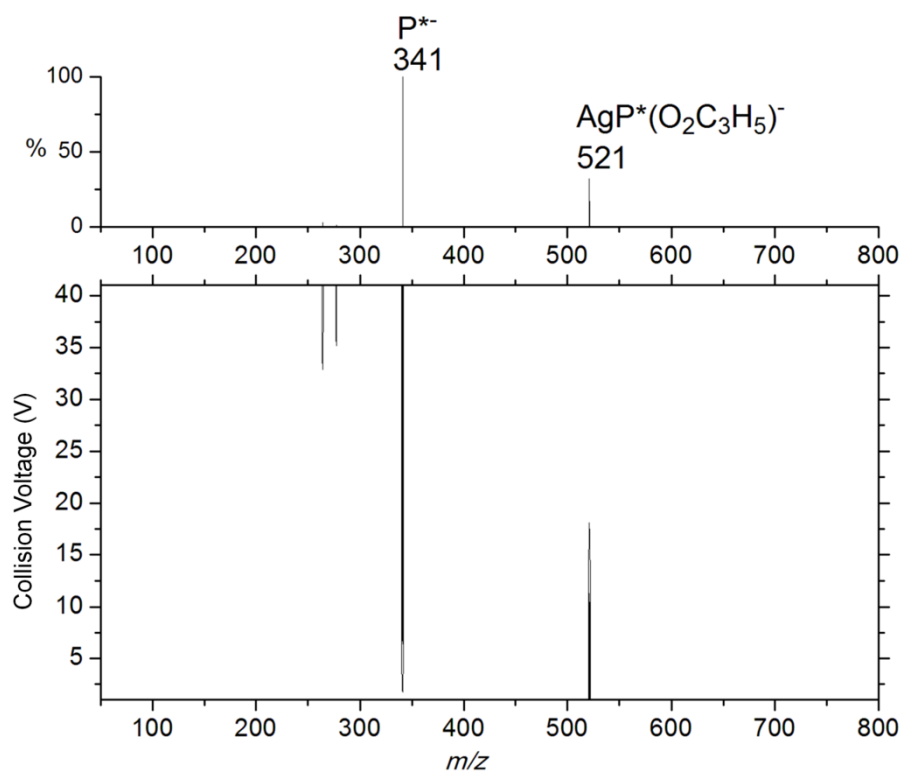

**Figure S30:** Energy-dependent CID of  $\text{AgP}^*(\text{O}_2\text{C}_3\text{H}_5)^-$  (**2b**).  $\text{P}^* = \text{P}(\text{C}_6\text{H}_5)_2(\text{C}_6\text{H}_4\text{SO}_3)^-$ .



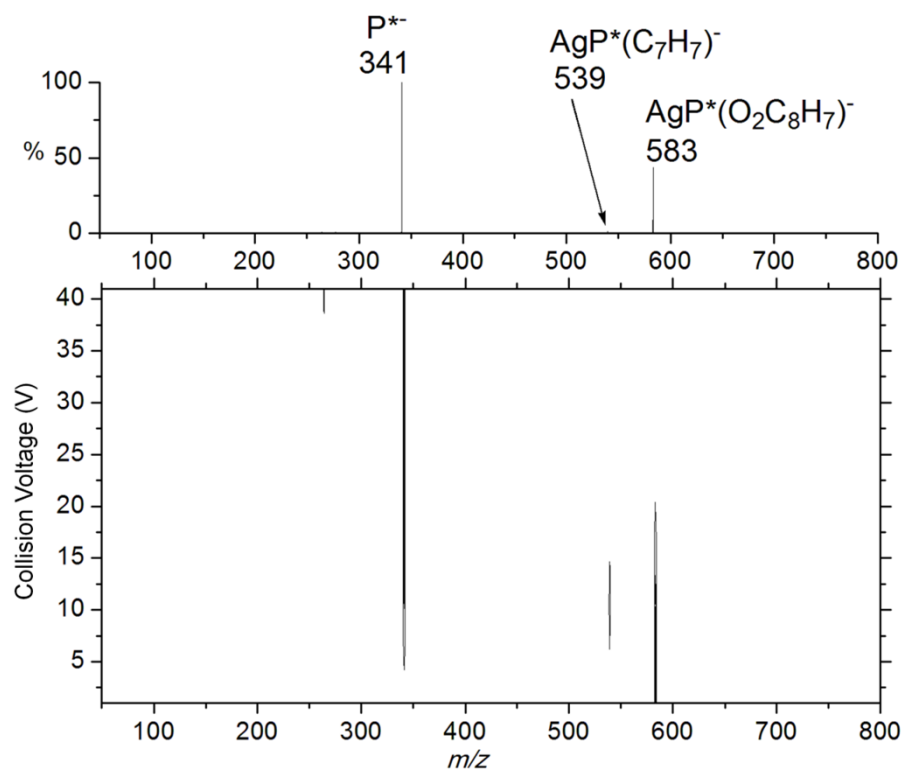

**Figure S31:** Energy-dependent CID of  $\text{AgP}^*(\text{O}_2\text{C}_8\text{H}_7)^-$  (**3b**).  $\text{P}^* = \text{P}(\text{C}_6\text{H}_5)_2(\text{C}_6\text{H}_4\text{SO}_3)^-$ .

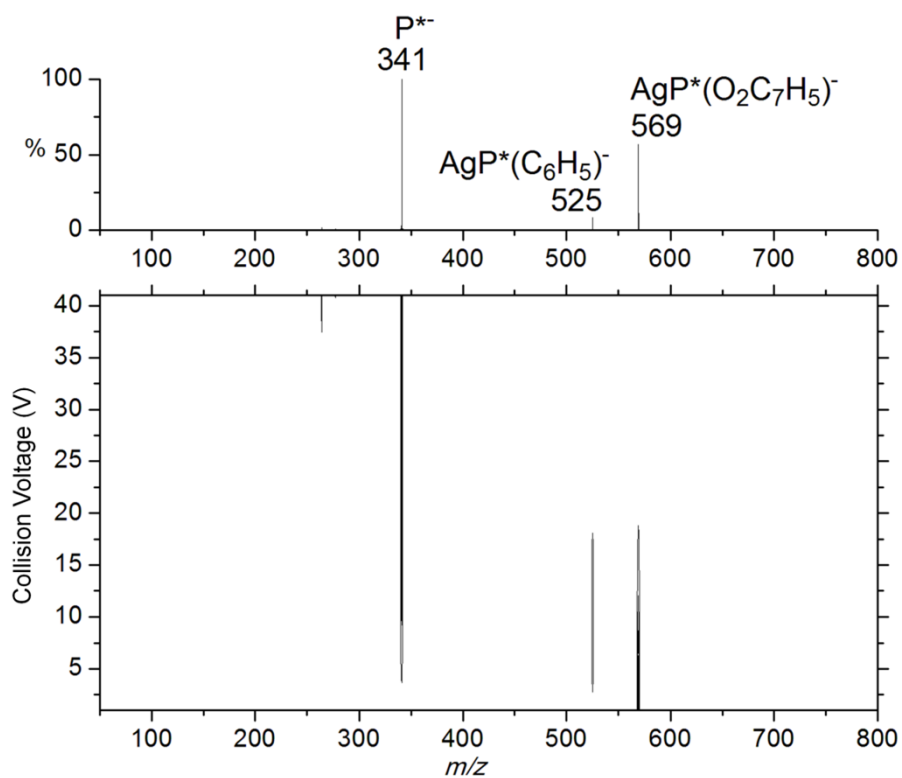

**Figure S32:** Energy-dependent CID of  $\text{AgP}^*(\text{O}_2\text{C}_7\text{H}_5)^-$  (**4b**).  $\text{P}^* = \text{P}(\text{C}_6\text{H}_5)_2(\text{C}_6\text{H}_4\text{SO}_3)^-$ .

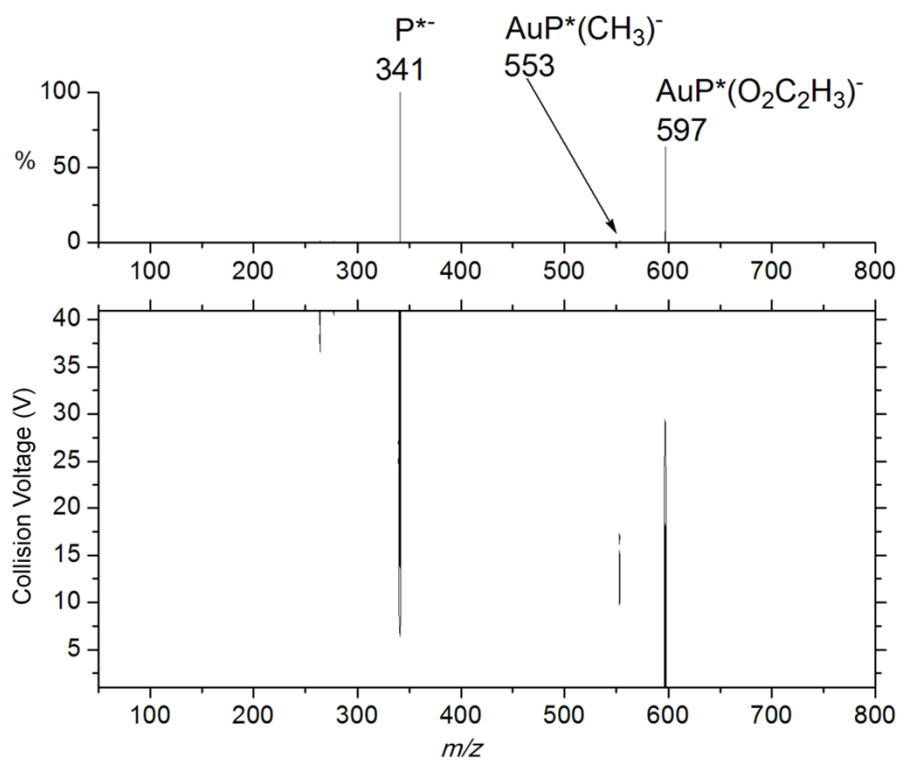

**Figure S33:** Energy-dependent CID of  $\text{AuP}^*(\text{O}_2\text{C}_2\text{H}_3)^-$  (**1c**).  $\text{P}^* = \text{P}(\text{C}_6\text{H}_5)_2(\text{C}_6\text{H}_4\text{SO}_3)^-$ .

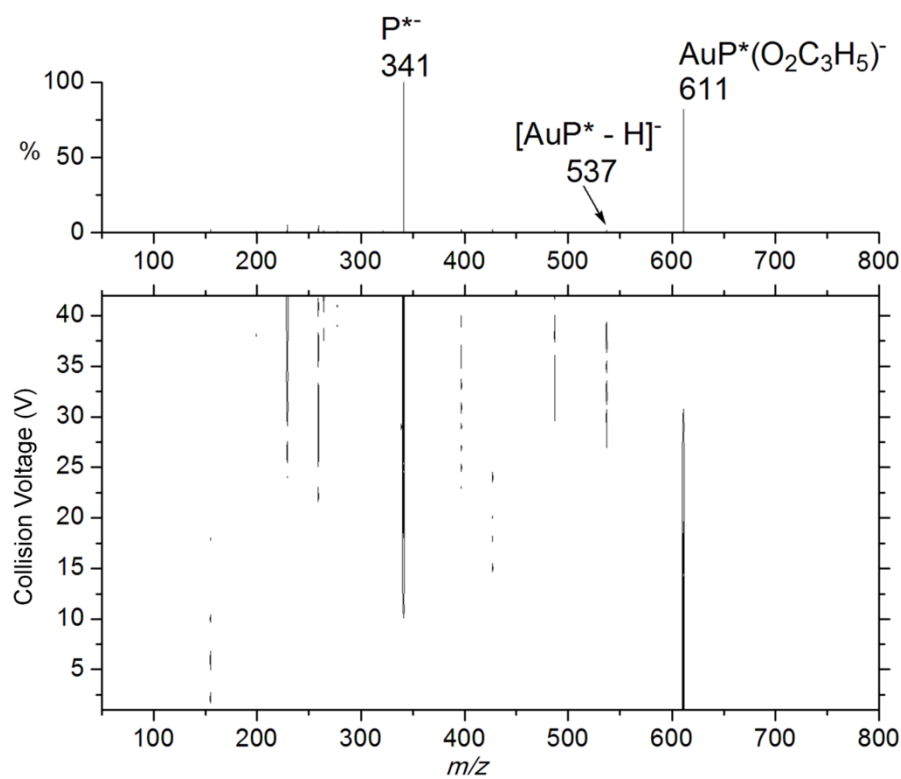

**Figure S34:** Energy-dependent CID of  $\text{AuP}^*(\text{O}_2\text{C}_3\text{H}_5)^-$  (**2c**).  $\text{P}^* = \text{P}(\text{C}_6\text{H}_5)_2(\text{C}_6\text{H}_4\text{SO}_3)^-$ .

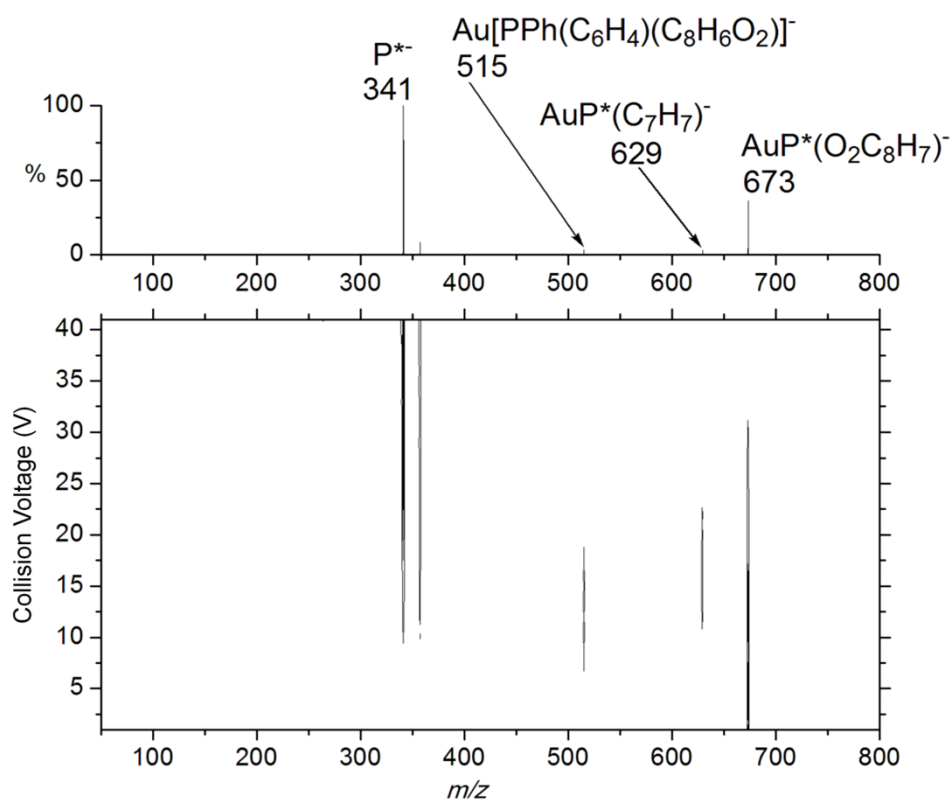

**Figure S35:** Energy-dependent CID of  $\text{AuP}^*(\text{O}_2\text{C}_8\text{H}_7)^-$  (**3c**).  $\text{P}^* = \text{P}(\text{C}_6\text{H}_5)_2(\text{C}_6\text{H}_4\text{SO}_3)^-$ .

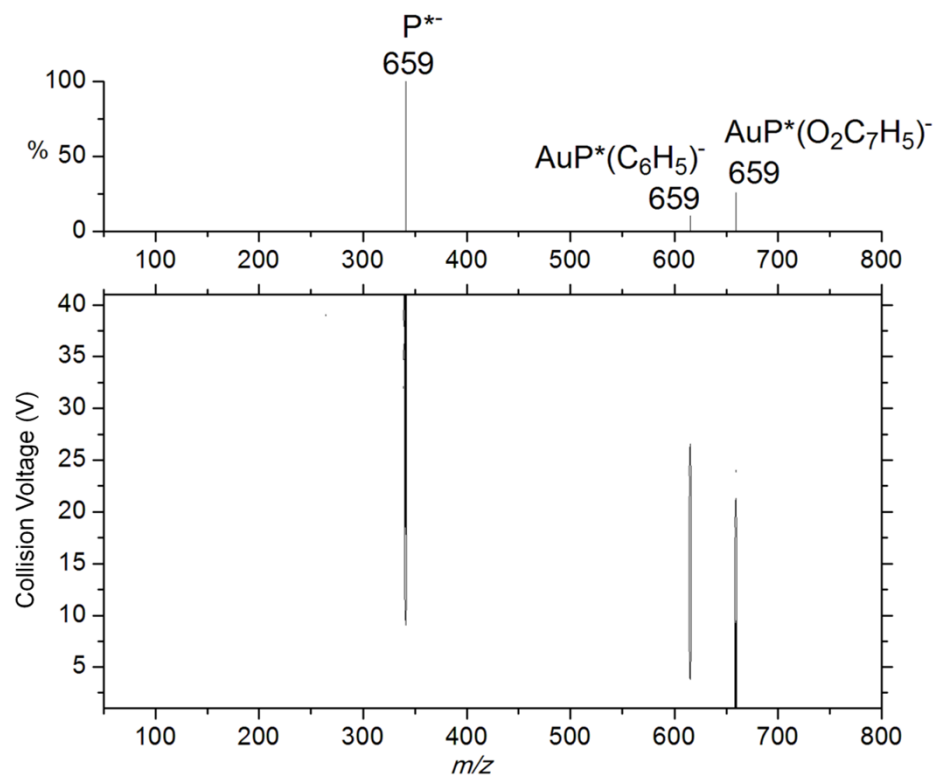

**Figure S36:** Energy-dependent CID of  $\text{AuP}^*(\text{O}_2\text{C}_7\text{H}_5)^-$  (**4c**).  $\text{P}^* = \text{P}(\text{C}_6\text{H}_5)_2(\text{C}_6\text{H}_4\text{SO}_3)^-$ .

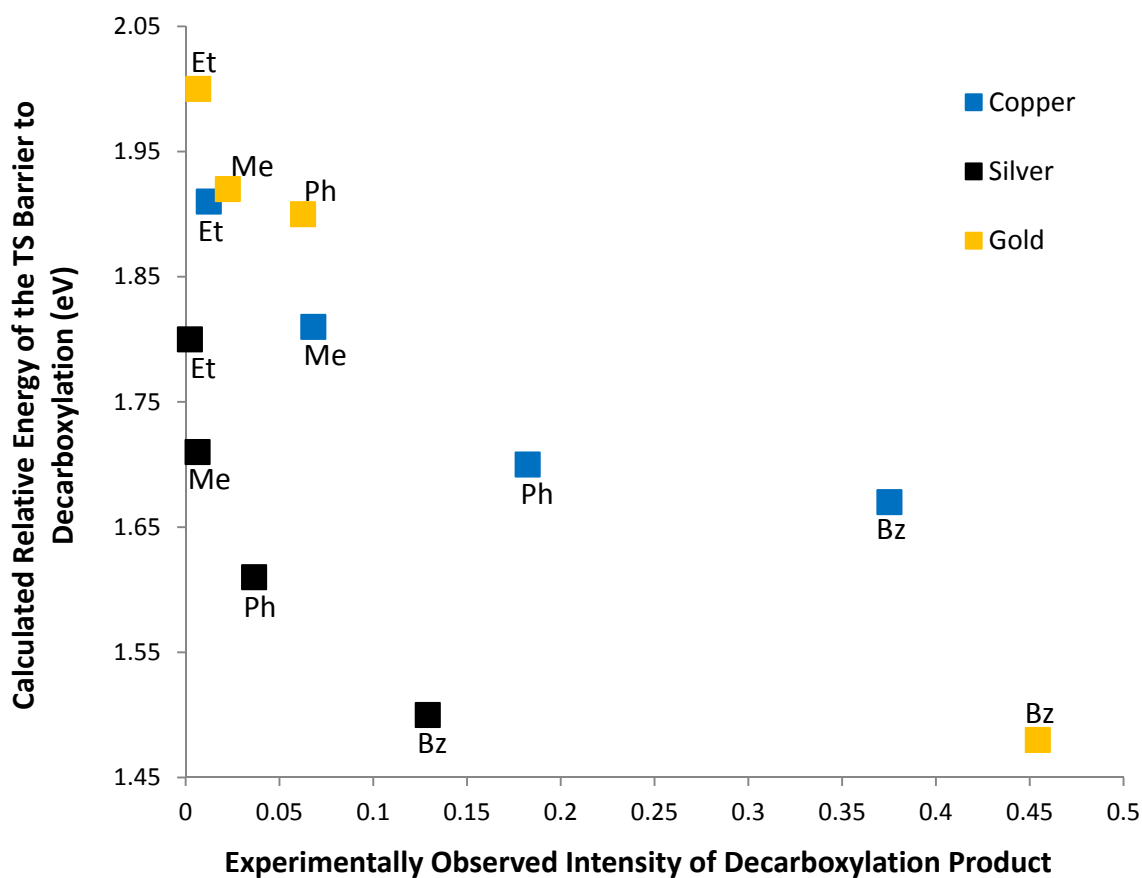

**Figure S37:** A comparison of the experimental ease of decarboxylation (x-axis) and the calculated transition state energy for decarboxylation (y-axis) from  $[LMO_2CR]^-$  where  $L = PPh_2(C_6H_4SO_3)^-$ ,  $M = Cu$  (blue),  $Ag$  (black) or  $Au$  (yellow) and  $R = Me$ ,  $Et$ ,  $benzyl$  (Bz) or  $Ph$  (see data point labels). The DFT-calculated transition state energy relative to the reactant is plotted on the y-axis. On the x-axis, the intensity of the decarboxylation fragmentation channel relative to the intensity of the reactant ion is taken from the summed energy-resolved CID experiments.

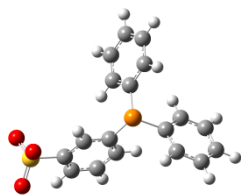

[PPh<sub>2</sub>C<sub>6</sub>H<sub>4</sub>SO<sub>3</sub>]<sup>-</sup>

|   |             |             |             |
|---|-------------|-------------|-------------|
| P | -1.09978200 | -0.02168500 | -1.07401900 |
| C | -2.46397200 | -1.13338600 | -0.47059700 |
| C | -2.54947900 | -2.40937300 | -1.05780200 |
| C | -3.42233700 | -0.78190000 | 0.49396000  |
| C | -3.54691000 | -3.31140900 | -0.68125700 |
| H | -1.82373700 | -2.69786100 | -1.81561000 |
| C | -4.43124400 | -1.67872400 | 0.86315300  |
| H | -3.38175600 | 0.19746000  | 0.96208400  |
| C | -4.49594200 | -2.94727300 | 0.28037600  |
| H | -3.58743100 | -4.29506200 | -1.14399900 |
| H | -5.16281100 | -1.38511800 | 1.61323800  |
| H | -5.27873200 | -3.64486300 | 0.56971400  |
| C | -1.59791500 | 1.61703800  | -0.35459900 |
| C | -0.94420000 | 2.22882400  | 0.72640300  |
| C | -2.63627600 | 2.32138800  | -0.99280900 |
| C | -1.32894600 | 3.50067800  | 1.16631500  |
| H | -0.12504800 | 1.71589800  | 1.22131800  |
| C | -3.03184500 | 3.58321600  | -0.54521000 |
| H | -3.13752400 | 1.87713300  | -1.85108900 |
| C | -2.37610000 | 4.17952400  | 0.53828200  |
| H | -0.80191800 | 3.95978700  | 1.99959900  |
| H | -3.84079600 | 4.10687700  | -1.05041700 |
| H | -2.67160600 | 5.16885800  | 0.88033400  |
| C | 0.32963700  | -0.53066400 | -0.01989000 |
| C | 1.61449600  | -0.21266300 | -0.49650000 |
| C | 0.20323200  | -1.20765100 | 1.20510300  |
| C | 2.75116100  | -0.54088400 | 0.24646600  |
| H | 1.75036300  | 0.28362400  | -1.45408000 |
| C | 1.34510900  | -1.55411600 | 1.93447000  |
| H | -0.77934600 | -1.47317200 | 1.58567800  |
| C | 2.61658000  | -1.21897000 | 1.46135800  |
| H | 1.23946100  | -2.09067700 | 2.87592500  |
| H | 3.51166800  | -1.49159200 | 2.01270300  |
| S | 4.41406300  | -0.04391600 | -0.33713700 |
| O | 4.67082600  | 1.23001300  | 0.39632600  |
| O | 4.25383400  | 0.11542700  | -1.81004600 |
| O | 5.29417100  | -1.17360100 | 0.07818800  |

Filename: PPh3SO3

Sum of electronic and zero-point Energies = -45153.5411

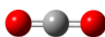

CO<sub>2</sub>

|   |             |             |            |
|---|-------------|-------------|------------|
| C | 0.00000000  | 0.00024900  | 0.00000000 |
| O | 1.18355200  | 0.02374700  | 0.00000000 |
| O | -1.18355200 | -0.02393400 | 0.00000000 |

Filename: CO2

Sum of electronic and zero-point Energies = -5131.5556

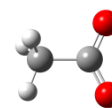

[CH<sub>3</sub>COO]<sup>-</sup>

|   |             |             |             |
|---|-------------|-------------|-------------|
| O | -0.80567200 | -1.11088900 | 0.00001000  |
| O | -0.70460300 | 1.16267700  | 0.00001000  |
| C | -0.20912000 | 0.00116500  | -0.00004800 |
| C | 1.35422800  | -0.04949300 | -0.00002000 |
| H | 1.72862700  | -1.08042300 | -0.00139300 |
| H | 1.74159300  | 0.47934200  | -0.88234600 |
| H | 1.74132700  | 0.47674000  | 0.88399100  |

Filename: CO2Me

Sum of electronic and zero-point Energies = -6217.6038

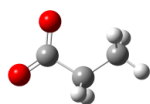

[CH<sub>3</sub>CH<sub>2</sub>COO]<sup>-</sup>

|   |             |             |             |
|---|-------------|-------------|-------------|
| O | -1.75588000 | -0.63955900 | 0.00069200  |
| O | -0.60986500 | 1.32518100  | -0.00039300 |
| C | -0.70987100 | 0.06745200  | -0.00005300 |
| C | 0.62883200  | -0.74934300 | -0.00089400 |
| H | 0.60528400  | -1.41671100 | 0.87379100  |
| H | 0.60571800  | -1.41387200 | -0.87777700 |
| C | 1.91375200  | 0.08513600  | 0.00066500  |
| H | 2.81316300  | -0.55330400 | -0.00070900 |
| H | 1.95260400  | 0.74150800  | -0.87666800 |
| H | 1.95291500  | 0.73793100  | 0.88067500  |

Filename: CO2Et

Sum of electronic and zero-point Energies = -7286.6586

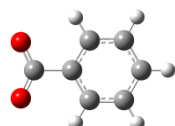

[PhCOO]<sup>-</sup>

|   |             |             |             |
|---|-------------|-------------|-------------|
| O | -2.37493500 | 1.13801900  | 0.00008400  |
| O | -2.37484400 | -1.13804300 | -0.00008000 |
| C | -1.83368600 | -0.00000400 | -0.00000200 |
| C | -0.28101300 | 0.00002300  | -0.00000300 |
| C | 0.43770200  | -1.20456300 | 0.00003100  |
| C | 0.43773100  | 1.20459000  | -0.00003400 |
| C | 1.83693900  | -1.20891800 | 0.00003600  |
| H | -0.13402100 | -2.12860900 | 0.00005400  |
| C | 1.83696900  | 1.20891300  | -0.00003600 |
| H | -0.13396700 | 2.12865200  | -0.00005000 |
| C | 2.54443700  | -0.00001100 | 0.00000100  |
| H | 2.37892500  | -2.15459300 | 0.00007100  |
| H | 2.37897600  | 2.15457600  | -0.00006200 |
| H | 3.63384300  | -0.00002400 | 0.00000400  |

Filename: CO2Ph

Sum of electronic and zero-point Energies = -11434.10673

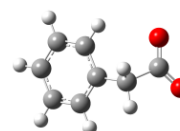

[PhCH<sub>2</sub>COO]<sup>-</sup>

|   |             |             |             |
|---|-------------|-------------|-------------|
| O | 3.03847900  | -0.79776100 | -0.66721300 |
| O | 2.28755500  | 1.31740800  | -0.28188000 |
| C | 2.29175200  | 0.06626300  | -0.14524900 |
| C | 1.20374400  | -0.49759300 | 0.86855200  |
| H | 1.36984600  | -1.57082100 | 1.00752700  |
| H | 1.39356000  | 0.00705400  | 1.82640900  |
| C | -0.21885200 | -0.24656300 | 0.44472200  |
| C | -0.73208500 | 1.06269600  | 0.35044300  |
| C | -1.07698200 | -1.30838900 | 0.10843700  |
| C | -2.04881400 | 1.29231000  | -0.05287200 |
| H | -0.06194300 | 1.89058400  | 0.56205000  |
| C | -2.39733400 | -1.08228500 | -0.29729400 |
| H | -0.69726900 | -2.32736700 | 0.16145700  |
| C | -2.89431800 | 0.22214300  | -0.37650200 |
| H | -2.41844600 | 2.31453600  | -0.12268400 |
| H | -3.03593700 | -1.92686900 | -0.55292000 |
| H | -3.92075100 | 0.40421100  | -0.69051900 |

Filename: CO2CH2Ph

Sum of electronic and zero-point Energies = -12503.0304

**Figure S38:** Cartesian coordinates and energies (eV) for P(C<sub>6</sub>H<sub>5</sub>)<sub>2</sub>(C<sub>6</sub>H<sub>4</sub>SO<sub>3</sub>), CO<sub>2</sub> and RCOO<sup>-</sup> (R = Me, Et, Ph and CH<sub>2</sub>Ph).

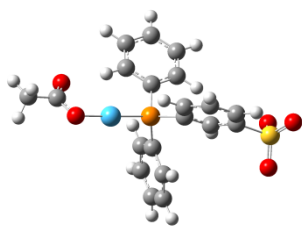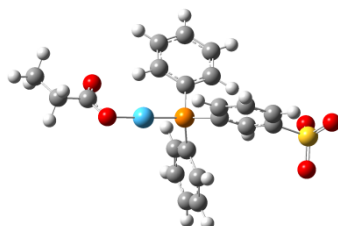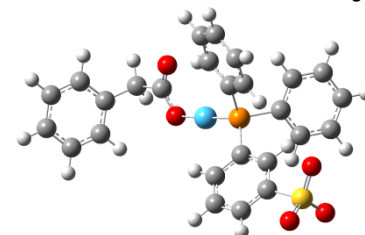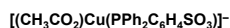

|    |             |             |             |
|----|-------------|-------------|-------------|
| Cu | -2.49052800 | -0.92676200 | -0.70940000 |
| P  | -0.63219400 | 0.05902400  | -0.08492200 |
| C  | -0.83815200 | 0.79527600  | 1.59392800  |
| C  | -2.13309000 | 0.88939800  | 2.13188300  |
| C  | 0.25779800  | 1.26309700  | 2.33975600  |
| C  | -2.32625400 | 1.45723700  | 3.39639200  |
| H  | -2.99241800 | 0.51515900  | 4.17765800  |
| C  | 0.05752600  | 1.82516800  | 3.60179800  |
| H  | 1.26814700  | 1.18250500  | 1.94983500  |
| C  | -1.23443400 | 1.92566100  | 4.13105400  |
| H  | -3.33245700 | 1.52235700  | 3.80291900  |
| H  | 0.91371300  | 2.17852300  | 4.17075100  |
| H  | -1.38586800 | 2.36149100  | 5.11608900  |
| C  | 0.20046300  | 1.48329800  | -1.17647500 |
| C  | -0.66269300 | 2.77640600  | -0.88706400 |
| C  | 0.51419000  | 1.26403300  | -2.36581300 |
| C  | -0.40805600 | 3.83154700  | -1.76748700 |
| H  | -1.21499300 | 2.96506300  | 0.02902500  |
| C  | 0.77270400  | 2.32168900  | -3.23970800 |
| H  | 0.89436500  | 0.27402500  | -2.60091400 |
| C  | 0.31129000  | 3.60793400  | -2.94427200 |
| H  | -0.76538600 | 4.82967800  | -1.52573500 |
| H  | 1.34897400  | 2.13974300  | -4.14298100 |
| H  | 0.51971200  | 4.43164100  | -3.62263400 |
| C  | 0.86390900  | -0.99214500 | -0.02582500 |
| C  | 2.15670500  | -0.44628900 | -0.03082200 |
| C  | 0.70102400  | -2.38549900 | 0.07879100  |
| C  | 3.27414600  | -1.27539300 | 0.08273400  |
| H  | 2.31897900  | 0.62349600  | -0.12168100 |
| C  | 1.82284900  | -3.20967000 | 0.19235300  |
| H  | -0.29646200 | -2.81931200 | 0.07358100  |
| C  | 3.10815600  | -2.65748500 | 0.19738200  |
| H  | 1.69254300  | -4.28647000 | 0.27641900  |
| H  | 3.99223700  | -3.28033100 | 0.29624200  |
| S  | 4.94308800  | -0.52399400 | 0.03842700  |
| O  | 4.79110200  | 0.70274100  | 0.87225300  |
| O  | 5.16361800  | -0.25455100 | -1.41094000 |
| O  | 5.82810400  | -1.57193100 | 0.61763800  |
| O  | -5.00876900 | -0.52181200 | 0.46557800  |
| O  | -4.12291500 | -1.73693700 | -1.21299600 |
| C  | -5.11062400 | -1.33492900 | -0.46773900 |
| C  | -6.45933100 | -1.95092200 | -0.82706200 |
| H  | -7.24376900 | -1.57250300 | -0.16736700 |
| H  | -6.70822800 | -1.71818300 | -1.86913400 |
| H  | -6.40259200 | -3.04278900 | -0.74555800 |

Filename: CuCO2MePPh3SO3\_5

Sum of electronic and zero-point Energies = -56742.4971

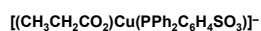

|    |             |             |             |
|----|-------------|-------------|-------------|
| Cu | -2.26852900 | -0.77380500 | -0.73220500 |
| P  | -0.37269000 | 0.12457000  | -0.08846300 |
| C  | -0.55247300 | 0.84147600  | 1.60175300  |
| C  | -1.84379800 | 0.98093000  | 2.13851400  |
| C  | 0.55991400  | 1.25067300  | 2.35764400  |
| C  | -2.01672900 | 1.53541500  | 3.41182900  |
| H  | -2.71639600 | 0.65202900  | 1.57636800  |
| C  | 0.37973600  | 1.79977600  | 3.62840700  |
| H  | 1.56713600  | 1.13426800  | 1.96868400  |
| C  | -0.90836200 | 1.94555200  | 4.15650300  |
| H  | -3.02047200 | 1.63588600  | 3.81724400  |
| H  | 1.25483800  | 2.10754800  | 4.20496600  |
| H  | -1.04424000 | 2.37103200  | 5.14830200  |
| C  | 0.12057700  | 1.54713000  | -1.05901000 |
| C  | -0.28849400 | 2.85350400  | -0.84669400 |
| C  | 0.82912700  | 1.31752200  | -2.34694400 |
| C  | 0.01218800  | 3.91113800  | -1.70943400 |
| H  | -0.83510600 | 3.05026700  | 0.07110700  |
| C  | 1.13391700  | 2.37743100  | -3.20300000 |
| H  | 1.16859100  | 0.31648000  | -2.59716400 |
| C  | 0.72523600  | 3.67678600  | -2.88796100 |
| H  | -0.30420200 | 4.91922900  | -1.45244600 |
| H  | 1.70491800  | 2.18625600  | -4.10771000 |
| H  | 0.96964500  | 4.50190800  | -3.55244600 |
| C  | 1.07847900  | -0.98838300 | -0.04313100 |
| C  | 2.39271600  | -0.49640400 | -0.03594800 |
| C  | 0.85783100  | -2.37529300 | 0.03858600  |
| C  | 3.47458500  | -1.37266100 | 0.06722900  |
| H  | 2.59944900  | 0.56705300  | -0.10887600 |
| C  | 1.94431900  | -3.24684600 | 0.14177400  |
| H  | -0.15670500 | -2.76733400 | 0.02383100  |
| C  | 3.25128100  | -2.74838900 | 0.15914500  |
| H  | 1.76940700  | -4.31854500 | 0.20815800  |
| H  | 4.10849100  | -3.40881200 | 0.25051400  |
| S  | 5.17323500  | -0.69018300 | 0.03916000  |
| O  | 5.06767100  | 0.53199000  | 0.88674900  |
| O  | 5.41172900  | -0.41328200 | -1.40593800 |
| O  | 6.01153700  | -1.78032800 | 0.60984900  |
| O  | -4.78146900 | -0.28857000 | 0.44644100  |
| O  | -3.93141800 | -1.50645900 | -1.24837100 |
| C  | -4.90810900 | -1.08099400 | -0.50090700 |
| C  | -6.27717800 | -1.64911200 | -0.88732800 |
| H  | -6.44483500 | -1.40637300 | -1.94551000 |
| H  | -6.19879000 | -2.74422600 | -0.84919000 |
| C  | -7.43735600 | -1.15436200 | -0.02278800 |
| H  | -7.53089800 | -0.06429700 | -0.07560100 |
| H  | -8.38482800 | -1.60003300 | -0.35386000 |
| H  | -7.28242300 | -1.41376200 | 1.03002200  |

Filename: CuCO2EtPPh3SO3\_4

Sum of electronic and zero-point Energies = -57811.5341

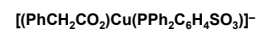

|    |             |             |             |
|----|-------------|-------------|-------------|
| Cu | -1.46912600 | 0.34865500  | -0.82703000 |
| P  | 0.58663400  | 0.57837700  | -0.09408200 |
| C  | 0.56999000  | 1.21583000  | 1.63662300  |
| C  | -0.63052100 | 1.73753300  | 2.14815400  |
| C  | 1.71829600  | 1.19760300  | 2.44727100  |
| C  | -0.67475200 | 2.24506900  | 3.45146000  |
| H  | -1.53503700 | 1.74388500  | 1.56214600  |
| C  | 1.66571800  | 1.70286100  | 3.74762000  |
| H  | 2.65115800  | 0.78236100  | 2.07762600  |
| C  | 0.47051400  | 2.22929100  | 4.25105100  |
| H  | -1.61015700 | 2.64312000  | 3.83680100  |
| H  | 2.55928300  | 1.67851700  | 4.36609500  |
| H  | 0.43288200  | 2.61842400  | 5.26606400  |
| C  | 1.53173300  | 1.83981200  | -1.05064000 |
| C  | 1.50774000  | 3.19174100  | -0.67773700 |
| C  | 2.20445600  | 1.47030000  | -2.23053700 |
| C  | 2.15064200  | 4.15455400  | -1.46405100 |
| H  | 0.99508800  | 3.49573700  | 0.23047000  |
| C  | 2.85198300  | 2.43400500  | -3.00610500 |
| H  | 2.24932800  | 0.42737100  | -2.53070400 |
| C  | 2.82568200  | 3.77867100  | -2.62479600 |
| H  | 2.13005200  | 5.19710200  | -1.15214500 |
| H  | 3.38995900  | 2.12736300  | -3.89921400 |
| H  | 3.33616100  | 4.52665900  | -3.22646400 |
| C  | 1.61841900  | -0.93146200 | -0.10206500 |
| C  | 3.01891300  | -0.87503100 | -0.02822300 |
| C  | 0.97650300  | -2.18260700 | -0.13438700 |
| C  | 3.77126100  | -2.04940400 | 0.02618900  |
| H  | 3.54818900  | 0.07293100  | -0.01049800 |
| C  | 1.73494300  | -3.35428000 | -0.07796900 |
| H  | -0.10789600 | -2.23754500 | -0.19954200 |
| C  | 3.12967600  | -3.29020700 | 0.00463600  |
| H  | 1.23440700  | -4.31993400 | -0.09872500 |
| H  | 3.73529900  | -4.18983300 | 0.06170700  |
| S  | 5.59757700  | -1.93130400 | 0.08086200  |
| O  | 5.84136600  | -0.76056300 | 0.97142000  |
| O  | 5.97229400  | -1.70496000 | -1.34402500 |
| O  | 6.02864900  | -3.24398800 | 0.63551200  |
| O  | -3.75056400 | 1.61488800  | 0.27570600  |
| O  | -3.26377000 | 0.19382400  | -1.40783200 |
| C  | -4.07795400 | 0.89683000  | -0.68049200 |
| C  | -5.55939300 | 0.77190900  | -1.08463400 |
| H  | -6.08843500 | 1.64989400  | -0.70366200 |
| H  | -5.61825900 | 0.77181500  | -2.17881900 |
| C  | -6.19222400 | -0.49307200 | -0.53725000 |
| C  | -6.00824000 | -1.72784000 | -1.17981700 |
| C  | -6.95949900 | -0.45998800 | 0.63654200  |
| C  | -6.57796300 | -2.89472000 | -0.66481800 |
| H  | -5.40072300 | -1.77018900 | -2.08024300 |
| C  | -7.53083500 | -1.62615700 | 1.15564300  |
| H  | -7.10226900 | 0.48783000  | 1.15096300  |
| C  | -7.34349700 | -2.84918500 | 0.50556100  |
| H  | -6.42141000 | -3.84176000 | -1.17661500 |
| H  | -8.12045100 | -1.57774800 | 2.06858500  |
| H  | -7.78660100 | -3.75771600 | 0.90688600  |

Filename: CuCO2CH2PhPPh3SO3\_3

Sum of electronic and zero-point Energies = -63027.6951

**Figure S39:** Cartesian coordinates and energies (eV) for  $[(RCO_2)Cu(PPh_2C_6H_4SO_3)]^-$ , R = Me, Et, Ph and  $CH_2Ph$ .

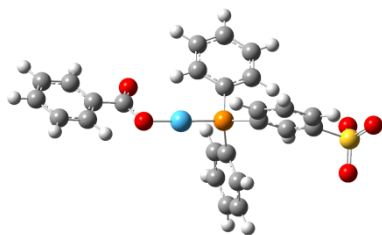

$[(\text{PhCO}_2)\text{Cu}(\text{PPh}_2\text{C}_6\text{H}_4\text{SO}_3)]^-$

|    |             |             |             |
|----|-------------|-------------|-------------|
| Cu | 1.64542000  | -0.48645100 | 0.25042000  |
| P  | -0.39685600 | 0.30001900  | 0.09345300  |
| C  | -0.45446900 | 1.68335000  | -1.12511800 |
| C  | 0.75737600  | 2.24067900  | -1.56752700 |
| C  | -1.67028900 | 2.19156000  | -1.61456900 |
| C  | 0.74853900  | 3.30216300  | -2.47945200 |
| H  | 1.70937800  | 1.84774800  | -1.21456000 |
| C  | -1.67112900 | 3.24851400  | -2.52655500 |
| H  | -2.61692200 | 1.76264000  | -1.29952000 |
| C  | -0.46258900 | 3.80714700  | -2.95845300 |
| H  | 1.69250000  | 3.72325300  | -2.81642500 |
| H  | -2.61772700 | 3.62920300  | -2.90149300 |
| H  | -0.46753000 | 4.62837200  | -3.67164400 |
| C  | -0.97582700 | 1.04179100  | 1.68096500  |
| C  | -0.76372200 | 2.40116300  | 1.95781800  |
| C  | -1.54711200 | 0.22419500  | 2.67014300  |
| C  | -1.12315300 | 2.93384400  | 3.19889200  |
| H  | -0.32536600 | 3.04885100  | 1.20403300  |
| C  | -1.91135200 | 0.76127800  | 3.90627400  |
| H  | -1.73447900 | -0.82691500 | 2.47025800  |
| C  | -1.69911700 | 2.11673400  | 4.17504000  |
| H  | -0.96015700 | 3.99063200  | 3.39626400  |
| H  | -2.37550600 | 0.12051900  | 4.65127700  |
| H  | -1.98970000 | 2.53449000  | 5.13581400  |
| C  | -1.68824900 | -0.89820600 | -0.39750800 |
| C  | -3.05077700 | -0.65861100 | -0.16268400 |
| C  | -1.29715600 | -2.06714800 | -1.07554100 |
| C  | -4.01458700 | -1.56385200 | -0.61049800 |
| H  | -3.38646300 | 0.22776300  | 0.36713000  |
| C  | -2.26613500 | -2.96875200 | -1.52125300 |
| H  | -0.24291900 | -2.26669500 | -1.25443200 |
| C  | -3.62338800 | -2.71809700 | -1.29273900 |
| H  | -1.96004400 | -3.86997800 | -2.04811900 |
| H  | -4.39241900 | -3.40107000 | -1.64124800 |
| S  | -5.77838000 | -1.22704700 | -0.25329100 |
| O  | -5.90785200 | 0.23613400  | -0.50925200 |
| O  | -5.92078800 | -1.61198100 | 1.17961200  |
| O  | -6.51502500 | -2.09994700 | -1.20822900 |
| O  | 3.97429000  | 0.82932000  | -0.61924100 |
| O  | 3.42502300  | -1.11548200 | 0.37770400  |
| C  | 4.27597400  | -0.26690700 | -0.11588100 |
| C  | 5.72461600  | -0.69420100 | -0.04692700 |
| C  | 6.09304800  | -1.92548600 | 0.51427400  |
| C  | 6.71964500  | 0.15425700  | -0.55293800 |
| C  | 7.43753300  | -2.30243100 | 0.56804600  |
| H  | 5.31479800  | -2.57396500 | 0.90300100  |
| C  | 8.06362900  | -0.22157200 | -0.49950800 |
| H  | 6.41679500  | -1.10358600 | -0.98388800 |
| C  | 8.42607200  | -1.45167100 | 0.06139600  |
| H  | 7.71448300  | -3.25946900 | 1.00483800  |
| H  | 8.82873300  | 0.44317100  | -0.89475800 |
| H  | 9.47281100  | -1.74538100 | 0.10321400  |

Filename: CuCO2PhPPh3SO3\_4

Sum of electronic and zero-point Energies = -61958.7880

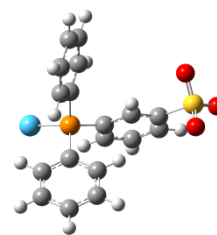

$[\text{Cu}(\text{PPh}_2\text{C}_6\text{H}_4\text{SO}_3)]^-$

|    |             |             |             |
|----|-------------|-------------|-------------|
| P  | 1.25514900  | -0.00528000 | 0.58649900  |
| C  | 1.87917500  | -1.17536100 | -0.67473800 |
| C  | 3.25203600  | -1.45893500 | -0.75858200 |
| C  | 0.98637400  | -1.77276100 | -1.58124200 |
| C  | 3.73270900  | -2.32159600 | -1.74570400 |
| H  | 3.94958800  | -1.00915700 | -0.05404500 |
| C  | 1.47444100  | -2.63527400 | -2.56571600 |
| H  | -0.07996700 | -1.57465500 | -1.52570800 |
| C  | 2.84265000  | -2.90978100 | -2.64997500 |
| H  | 4.79603400  | -2.53746200 | -1.80387600 |
| H  | 0.77823500  | -3.09294400 | -3.26264200 |
| H  | 3.21462200  | -3.58558800 | -3.41526400 |
| C  | 1.21958600  | 1.66092700  | -0.16226500 |
| C  | 1.97074000  | 1.95712600  | -1.31100600 |
| C  | 0.44857700  | 2.66684300  | 0.44765100  |
| C  | 1.94211200  | 3.24683600  | -1.84700700 |
| H  | 2.55886900  | 1.18597100  | -1.79913100 |
| C  | 0.42063200  | 3.94962500  | -0.09826600 |
| H  | -0.15775500 | 2.44421600  | 1.32128000  |
| C  | 1.16839600  | 4.24184400  | -1.24388100 |
| H  | 2.51270200  | 3.46696100  | -2.74498100 |
| H  | -0.20076300 | 4.71329000  | 0.36014500  |
| H  | 1.13684700  | 5.23990300  | -1.67192000 |
| C  | -0.43169900 | -0.46111600 | 1.04731300  |
| C  | -1.49576100 | -0.06596800 | 0.22415100  |
| C  | -0.66888700 | -1.28582600 | 2.16497000  |
| C  | -2.78904200 | -0.51417200 | 0.49661400  |
| H  | -1.34571800 | 0.58312700  | -0.63347500 |
| C  | -1.96869700 | -1.70874900 | 2.44008400  |
| H  | 0.15185200  | -1.59674000 | 2.80953800  |
| C  | -3.02759400 | -1.32936200 | 1.60368600  |
| H  | -2.15813800 | -2.33645200 | 3.30722200  |
| H  | -4.04648400 | -1.65191200 | 1.79760400  |
| S  | -4.11208800 | -0.04255900 | -0.68151900 |
| O  | -3.69357300 | -0.77444900 | -1.90975000 |
| O  | -3.96471900 | 1.43500300  | -0.76850900 |
| O  | -5.35587200 | -0.53037900 | -0.03784300 |
| Cu | 2.55983100  | -0.03571000 | 2.35980600  |

Filename: CuPPh3SO3

Sum of electronic and zero-point Energies = -50520.7214

**Figure S39 (cont'd):** Cartesian coordinates and energies (eV) for  $[(\text{RCO}_2)\text{Cu}(\text{PPh}_2\text{C}_6\text{H}_4\text{SO}_3)]^-$ , R = Me, Et, Ph and  $\text{CH}_2\text{Ph}$ , and for  $[\text{Cu}(\text{PPh}_2\text{C}_6\text{H}_4\text{SO}_3)]^-$ .

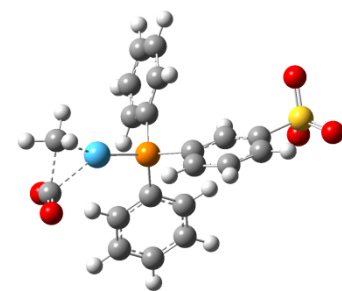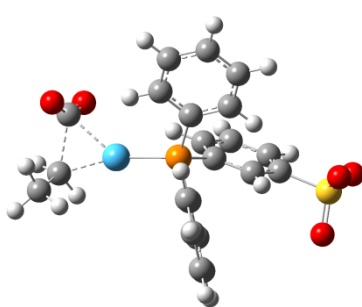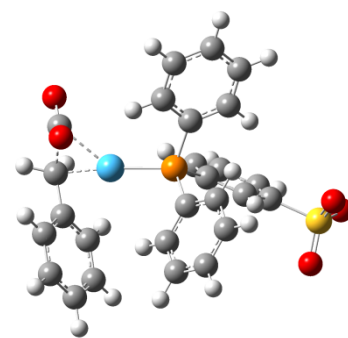

TS [(CH<sub>3</sub>CO<sub>2</sub>)Cu(PPh<sub>2</sub>C<sub>6</sub>H<sub>4</sub>SO<sub>3</sub>)]<sup>-</sup> →  
 [(CH<sub>3</sub>)Cu(PPh<sub>2</sub>C<sub>6</sub>H<sub>4</sub>SO<sub>3</sub>)]<sup>-</sup>  
 (-339 cm<sup>-1</sup>)

|    |             |             |             |
|----|-------------|-------------|-------------|
| Cu | 2.56740100  | -0.91793500 | -0.83840800 |
| O  | 4.83858600  | -2.71865800 | 0.30074300  |
| C  | 4.61758600  | -1.62136200 | -0.15310200 |
| O  | 4.81440200  | -0.42737700 | 0.05835600  |
| C  | 3.90352300  | -1.94657800 | -2.01446500 |
| H  | 3.39800000  | -1.30905100 | -2.77089600 |
| H  | 4.95860500  | -1.91421800 | -2.29848100 |
| H  | 3.54823300  | -2.97760500 | -2.08113300 |
| P  | 0.74501200  | 0.10442200  | -0.08089800 |
| C  | 0.28610200  | 1.51000300  | -1.18609900 |
| C  | 0.71067900  | 2.81816500  | -0.90817900 |
| C  | -0.41744000 | 1.25845100  | -2.37608200 |
| C  | 0.43014800  | 3.85660900  | -1.80091800 |
| H  | 1.25240300  | 3.03221300  | 0.00852800  |
| C  | -0.70240400 | 2.29919100  | -3.26156400 |
| H  | -0.77046400 | 0.25596300  | -2.60119000 |
| C  | -0.27777400 | 3.60087900  | -2.97781800 |
| H  | 0.75776600  | 4.86686900  | -1.56785000 |
| H  | -1.27102000 | 2.09235000  | -4.16428800 |
| H  | -0.50693800 | 4.41145400  | -3.66515100 |
| C  | 0.97998200  | 0.86736000  | 1.58102200  |
| C  | -0.11090400 | 1.27840400  | 2.36649300  |
| C  | 2.28663800  | 1.04444000  | 2.06525100  |
| C  | 0.10671700  | 1.86666400  | 3.61382200  |
| H  | -1.12939300 | 1.13417000  | 2.01836200  |
| C  | 2.49766300  | 1.63674000  | 3.31511200  |
| H  | 3.14034900  | 0.71363900  | 1.47842200  |
| C  | 1.41031000  | 2.04891900  | 4.08921600  |
| H  | -0.74533400 | 2.17642500  | 4.21345500  |
| H  | 3.51335500  | 1.76400000  | 3.68126600  |
| H  | 1.57527700  | 2.50339600  | 5.06345700  |
| C  | -0.74548000 | -0.94934800 | 0.02821900  |
| C  | -0.57649400 | -2.33748400 | 0.18421000  |
| C  | -2.03927100 | -0.40702600 | 0.01185500  |
| C  | -1.69502000 | -3.15937900 | 0.33682300  |
| H  | 0.42194700  | -2.76909200 | 0.19151000  |
| C  | -3.15350700 | -1.23489200 | 0.16260700  |
| H  | -2.20409100 | 0.65866100  | -0.11584800 |
| C  | -2.98233000 | -2.61096800 | 0.32780000  |
| H  | -1.56073000 | -4.23159200 | 0.46188200  |
| H  | -3.86423700 | -3.23192200 | 0.45412700  |
| S  | -4.82330600 | -0.48629100 | 0.10657400  |
| O  | -5.03002700 | -0.20970400 | -1.34340500 |
| O  | -5.71199300 | -1.53760200 | 0.63732500  |
| O  | -4.67884100 | 0.73660000  | 0.94739100  |

Filename: TS\_CuCO2MePPh3SO3\_3  
 Sum of electronic and zero-point Energies = -56740.6863

TS [(CH<sub>3</sub>CH<sub>2</sub>CO<sub>2</sub>)Cu(PPh<sub>2</sub>C<sub>6</sub>H<sub>4</sub>SO<sub>3</sub>)]<sup>-</sup> →  
 [(CH<sub>3</sub>CH<sub>2</sub>)Cu(PPh<sub>2</sub>C<sub>6</sub>H<sub>4</sub>SO<sub>3</sub>)]<sup>-</sup>  
 (-299 cm<sup>-1</sup>)

|    |             |             |             |
|----|-------------|-------------|-------------|
| Cu | 2.45478400  | -0.66593700 | -0.85843100 |
| O  | 3.58691000  | -2.84411300 | -0.19647600 |
| C  | 4.23799600  | -1.80551300 | -0.23824000 |
| O  | 5.09084000  | -1.19633800 | 0.37804700  |
| C  | 4.09557200  | -0.96207400 | -2.08265100 |
| H  | 4.67763200  | -1.84201300 | -2.37149400 |
| H  | 3.22694900  | -1.00419000 | -2.77852000 |
| P  | 0.59431600  | 0.13852500  | 0.05588300  |
| C  | 0.17023700  | 1.79704200  | -0.63249500 |
| C  | 0.58680000  | 2.97350600  | 0.00923300  |
| C  | -0.49312000 | 1.89133500  | -1.86750300 |
| C  | 0.33822100  | 4.22092700  | -0.57041400 |
| H  | 1.09670200  | 2.92067800  | 0.96688600  |
| C  | -0.74638000 | 3.13913100  | -2.43985100 |
| H  | -0.84055900 | 0.99412300  | -2.37195100 |
| C  | -0.32983600 | 4.30738700  | -1.79440800 |
| H  | 0.65888900  | 5.12417400  | -0.05695500 |
| H  | -1.28477000 | 3.19521900  | -3.38216000 |
| H  | -0.53469900 | 5.27852000  | -2.23811700 |
| C  | 0.75600600  | 0.40738900  | 1.87199000  |
| C  | -0.36428400 | 0.68310400  | 2.67524600  |
| C  | 2.02623300  | 0.32942000  | 2.46455800  |
| C  | -0.20939800 | 0.88804900  | 4.04721900  |
| H  | -1.35859500 | 0.72664700  | 2.24028900  |
| C  | 2.17682800  | 0.53715100  | 3.83976400  |
| H  | 2.90024600  | 0.09451600  | 1.86172500  |
| C  | 1.06078200  | 0.81808800  | 4.63123500  |
| H  | -1.08419500 | 1.09525100  | 4.65816600  |
| H  | 3.16542300  | 0.46744900  | 4.28631900  |
| C  | 1.17642400  | 0.97305300  | 5.70144800  |
| H  | -0.88602900 | -0.90486100 | -0.19159700 |
| C  | -0.70258600 | -2.28617800 | -0.38961100 |
| C  | -2.18435600 | -0.37614400 | -0.13858400 |
| C  | -1.81677700 | -3.11815700 | -0.52007900 |
| C  | 0.29976700  | -2.70695800 | -0.43100400 |
| C  | -3.29249900 | -1.21409900 | -0.27453000 |
| H  | -2.35869800 | 0.68553900  | 0.00768500  |
| C  | -3.10963300 | -2.58585700 | -0.46312700 |
| H  | -1.67361000 | -4.18631600 | -0.66743300 |
| H  | -3.98738800 | -3.21873400 | -0.55464000 |
| S  | -4.96643900 | -0.47379500 | -0.24286900 |
| O  | -5.09899700 | 0.13671700  | -1.59648300 |
| O  | -5.87085900 | -1.62872100 | 0.01036000  |
| O  | -4.88392400 | 0.51735100  | 0.86817100  |
| C  | 4.90633200  | 0.32252100  | -2.23905100 |
| H  | 5.46513800  | 0.34388900  | -3.18749000 |
| H  | 4.27283700  | 1.21789700  | -2.21238900 |
| H  | 5.62964300  | 0.40411400  | -1.41980300 |

Filename: TS\_CuCO2EtPPh3SO3\_2  
 Sum of electronic and zero-point Energies = -57809.6258

TS [(PhCH<sub>2</sub>CO<sub>2</sub>)Cu(PPh<sub>2</sub>C<sub>6</sub>H<sub>4</sub>SO<sub>3</sub>)]<sup>-</sup> →  
 [(PhCH<sub>2</sub>)Cu(PPh<sub>2</sub>C<sub>6</sub>H<sub>4</sub>SO<sub>3</sub>)]<sup>-</sup>  
 (-237 cm<sup>-1</sup>)

|    |             |             |             |
|----|-------------|-------------|-------------|
| Cu | -2.22163800 | 0.22163500  | -0.62343400 |
| O  | -4.15048400 | 2.02498700  | -2.23283300 |
| C  | -4.03602400 | 1.37892700  | -1.21634900 |
| O  | -4.17068800 | 1.47235100  | 0.00575400  |
| C  | -3.84724400 | -0.55352900 | -1.79390300 |
| H  | -4.91959600 | -0.43589300 | -1.95874200 |
| H  | -3.35556600 | -0.59186300 | -2.76947800 |
| P  | -0.18283200 | 0.66253400  | 0.13846700  |
| C  | 0.10180300  | 0.00916400  | 1.83721400  |
| C  | 0.90510000  | 0.67404800  | 2.77609800  |
| C  | -0.49293200 | -1.21393600 | -2.18831300 |
| C  | 1.11858900  | 0.11854200  | 4.04031000  |
| H  | 1.37073600  | 1.62192700  | 2.52423000  |
| C  | -0.27490200 | -1.76780700 | 3.45114200  |
| H  | -1.12510400 | -1.73912900 | 1.47693400  |
| C  | 0.53163300  | -1.10309000 | 4.37952300  |
| H  | 1.75459500  | 0.63724900  | 4.75295900  |
| H  | -0.73605200 | -2.71841500 | 3.70638800  |
| H  | 0.70525200  | -1.53710800 | 5.36114600  |
| C  | 0.12382100  | 2.47587900  | 0.26934600  |
| C  | 1.39409000  | 3.03750600  | 4.37952300  |
| C  | -0.95827600 | 3.31441300  | 0.58785200  |
| H  | 1.57932600  | 4.41770800  | 0.18723300  |
| H  | 2.23845300  | 2.40608200  | -0.19781200 |
| C  | -0.76676200 | 4.69237500  | 0.71321800  |
| H  | -1.95350800 | 2.89672900  | 0.72220600  |
| C  | 0.50200200  | 5.24611200  | 0.51460100  |
| H  | 2.56781300  | 4.84012200  | 0.02532000  |
| H  | -1.61311600 | 5.33118100  | 0.95283700  |
| H  | 0.64844400  | 6.31994400  | 0.60523000  |
| C  | 1.17604600  | -0.00984000 | -0.89508000 |
| C  | 0.95777300  | -0.12957700 | -2.27942100 |
| C  | 2.43037100  | -0.32381700 | -0.35856100 |
| C  | 1.99394400  | -0.56291100 | -3.10804000 |
| H  | -0.01274700 | 0.11802700  | -2.70456600 |
| C  | 3.46593700  | -0.75075800 | -1.19505900 |
| H  | 2.62832500  | -0.23688000 | 0.70527100  |
| C  | 3.24834800  | -0.87109700 | -2.56867600 |
| H  | 1.82342600  | -0.65712600 | -4.17845500 |
| H  | 4.07232600  | -1.19410400 | -3.19789000 |
| S  | 5.09670500  | -1.14879700 | -0.46204300 |
| O  | 4.88112900  | -2.47353400 | 0.18424900  |
| O  | 6.02066700  | -1.16866200 | -1.62987200 |
| O  | 5.32148800  | -0.02853000 | 0.49641600  |
| C  | -3.58073100 | -1.74315900 | -0.92527600 |
| C  | -4.34733600 | -1.97601900 | 0.24079500  |
| C  | -2.56344500 | -2.67666000 | -1.23466700 |
| C  | -4.11641800 | -3.09375800 | 1.04313900  |
| H  | -5.12095100 | -1.26190900 | 0.51112300  |
| C  | -2.33458600 | -3.79380000 | -0.42886600 |
| H  | -1.95789000 | -2.52580000 | -2.12579300 |
| C  | -3.11122200 | -4.01167900 | 0.71440700  |
| H  | -4.72368300 | -3.24824200 | 1.93247300  |
| H  | -1.54547000 | -4.49292200 | -0.69515400 |
| H  | -2.93333200 | -4.88198100 | 1.34119000  |

Filename: TS\_CuCO2CH2PhPPh3SO3\_5  
 Sum of electronic and zero-point Energies = -63025.9912

**Figure S40:** Cartesian coordinates and transition state energies (eV) for decarboxylation from [(RCO<sub>2</sub>)Cu(P\*)]<sup>-</sup> (R = Me, Et, Ph, CH<sub>2</sub>Ph).



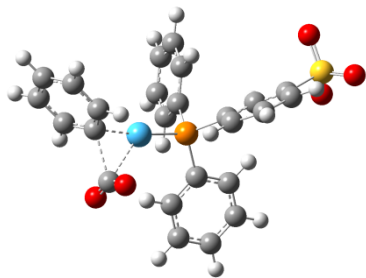

TS  $[(\text{PhCO}_2)\text{Cu}(\text{PPh}_2\text{C}_6\text{H}_4\text{SO}_3)]^- \rightarrow [(\text{Ph})\text{Cu}(\text{PPh}_2\text{C}_6\text{H}_4\text{SO}_3)]^-$   
 (-237  $\text{cm}^{-1}$ )

|    |             |             |             |
|----|-------------|-------------|-------------|
| Cu | -2.13103300 | -0.18663100 | -0.29635500 |
| O  | -3.71312200 | 0.15037700  | -2.81837300 |
| C  | -3.91276500 | 0.63559000  | -1.73058300 |
| O  | -4.19244800 | 1.65015500  | -1.12778400 |
| P  | -0.03983300 | 0.49638400  | 0.09845500  |
| C  | 0.34636900  | 0.35220800  | 1.89679200  |
| C  | 0.21626400  | 1.45235200  | 2.75793200  |
| C  | 0.68258300  | -0.90121700 | 2.43555000  |
| C  | 0.42543800  | 1.30252800  | 4.13202100  |
| H  | -0.03786400 | 2.42995400  | 2.35847500  |
| C  | 0.89825900  | -1.04544200 | 3.80694800  |
| H  | 0.80449900  | -1.76190700 | 1.78389600  |
| C  | 0.76833400  | 0.05521700  | 4.65949600  |
| H  | 0.33013900  | 2.16593300  | 4.78607700  |
| H  | 1.18282600  | -2.01617800 | 4.20394000  |
| H  | 0.94361100  | -0.05771800 | 5.72649700  |
| C  | 0.24258700  | 2.27213400  | -0.30703500 |
| C  | 1.53712900  | 2.81853200  | -0.35446000 |
| C  | -0.86350000 | 3.09443100  | -0.57531200 |
| C  | 1.71659300  | 4.16960900  | -0.65600100 |
| H  | 2.40743200  | 2.19599000  | -0.16890400 |
| C  | -0.67786000 | 4.44837000  | -0.87508000 |
| H  | -1.87058200 | 2.68451200  | -0.56702400 |
| C  | 0.61017400  | 4.98708600  | -0.91429000 |
| H  | 2.72291700  | 4.57867400  | -0.69444800 |
| H  | -1.54263100 | 5.07193300  | -1.08728800 |
| H  | 0.75491100  | 6.03796500  | -1.15416400 |
| C  | 1.25948600  | -0.45458300 | -0.76788900 |
| C  | 0.93157100  | -1.08634700 | -1.98170500 |
| C  | 2.57394700  | -0.52466600 | -0.28269900 |
| C  | 1.91964200  | -1.76589600 | -2.69748200 |
| H  | -0.08491300 | -1.04041300 | -2.36646800 |
| C  | 3.55610500  | -1.20686900 | -1.00305700 |
| H  | 2.85813500  | -0.05417700 | 0.65370000  |
| C  | 3.23033600  | -1.82654800 | -2.21153500 |
| H  | 1.66434700  | -2.24960600 | -3.63776000 |
| H  | 4.01434400  | -2.34169200 | -2.75859500 |
| S  | 5.25055900  | -1.29919100 | -0.31588800 |
| O  | 5.13809100  | -2.34142500 | 0.74375800  |
| O  | 6.09445700  | -1.68407900 | -1.48038200 |
| O  | 5.48545400  | 0.07842900  | 0.20437200  |
| C  | -3.97343700 | -0.92183700 | -0.37954800 |
| C  | -4.08877500 | -2.20410600 | -0.95781400 |
| C  | -4.74524300 | -0.65317500 | 0.77089200  |
| C  | -4.89699500 | -3.19078700 | -0.38609600 |
| H  | -3.55803300 | -2.41594500 | -1.88369400 |
| C  | -5.55852200 | -1.63340000 | 1.34876500  |
| H  | -4.72628000 | 0.34768000  | 1.19761200  |
| C  | -5.63027700 | -2.90661300 | 0.77249200  |
| H  | -4.96662500 | -4.17459200 | -0.84626600 |
| H  | -6.14360500 | -1.40440800 | 2.23753300  |
| H  | -6.26825100 | -3.66950500 | 1.21402400  |

Filename: TS\_CuCO2PPh3SO3\_2

Sum of electronic and zero-point Energies = -61957.1227

**Figure S40 (cont'd):** Cartesian coordinates and transition state energies (eV) for decarboxylation from  $[(\text{RCO}_2)\text{Cu}(\text{P}^*)]^-$  (R = Me, Et, Ph,  $\text{CH}_2\text{Ph}$ ).

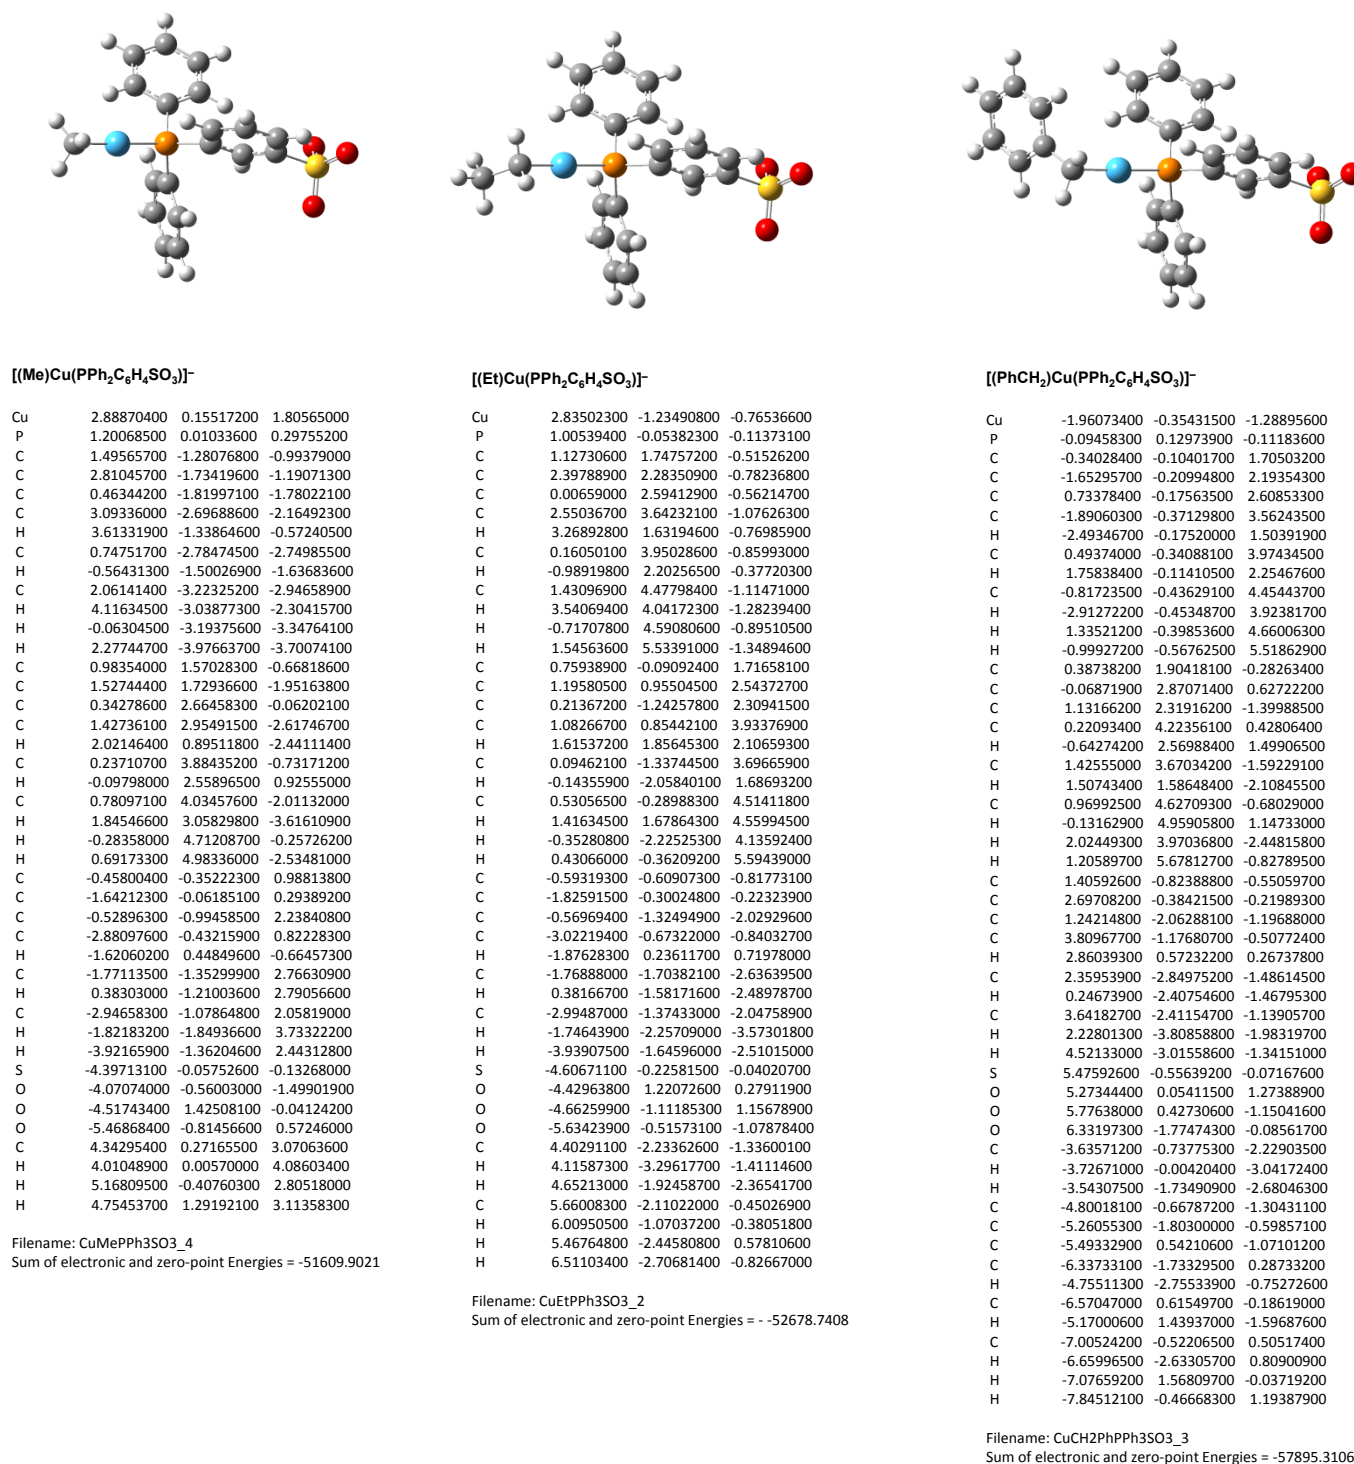

**Figure S41:** Cartesian coordinates and energies (eV) for [(R)Cu(PPh<sub>2</sub>C<sub>6</sub>H<sub>4</sub>SO<sub>3</sub>)]<sup>-</sup>, R = Me, Et, Ph and CH<sub>2</sub>Ph.

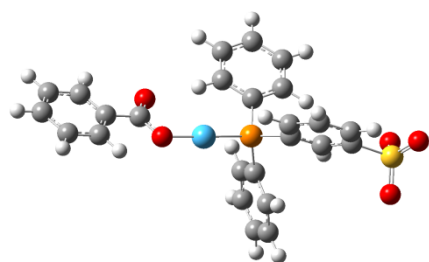

[(Ph)Cu(PPh<sub>2</sub>C<sub>6</sub>H<sub>4</sub>SO<sub>3</sub>)]<sup>-</sup>

|    |             |             |             |
|----|-------------|-------------|-------------|
| Cu | 2.44046800  | -0.37156200 | 0.01603500  |
| P  | 0.31392200  | 0.39093600  | -0.02470800 |
| C  | 0.07769500  | 1.74591600  | -1.25949100 |
| C  | 1.21479100  | 2.42564400  | -1.72674400 |
| C  | -1.18803700 | 2.12025200  | -1.74165200 |
| C  | 1.09050600  | 3.47029000  | -2.64812300 |
| H  | 2.20119700  | 2.13116700  | -1.37490000 |
| C  | -1.30903700 | 3.16101400  | -2.66556900 |
| H  | -2.08190200 | 1.60052600  | -1.41035100 |
| C  | -0.17248800 | 3.83948700  | -3.11855800 |
| H  | 1.98041800  | 3.98573700  | -3.00149400 |
| H  | -2.29497000 | 3.43597700  | -3.03142100 |
| H  | -0.27153800 | 4.64725900  | -3.84003600 |
| C  | -0.18364300 | 1.14690400  | 1.58500600  |
| C  | -0.12127800 | 2.53190300  | 1.79994400  |
| C  | -0.54125100 | 0.30760900  | 2.65397700  |
| C  | -0.41635100 | 3.06735100  | 3.05737200  |
| H  | 0.14684600  | 3.19840500  | 0.98535400  |
| C  | -0.84201800 | 0.84540500  | 3.90620900  |
| H  | -0.61086000 | -0.76637200 | 2.50439100  |
| C  | -0.77864900 | 2.22703100  | 4.11270600  |
| H  | -0.37327500 | 4.14384900  | 3.20526400  |
| H  | -1.14015700 | 0.18366200  | 4.71517000  |
| H  | -1.02035700 | 2.64505100  | 5.08682100  |
| C  | -0.97662300 | -0.85577700 | -0.38686400 |
| C  | -2.32596100 | -0.64892700 | -0.06279300 |
| C  | -0.59852800 | -2.03135600 | -1.06166300 |
| C  | -3.29330800 | -1.58564100 | -0.43233400 |
| H  | -2.64652700 | 0.23996600  | 0.47252200  |
| C  | -1.56935500 | -2.96954200 | -1.41910700 |
| H  | 0.44714400  | -2.20783300 | -1.30340500 |
| C  | -2.91599000 | -2.74623200 | -1.11132200 |
| H  | -1.27360700 | -3.87728700 | -1.94076700 |
| H  | -3.68840500 | -3.45488800 | -1.39502100 |
| S  | -5.04423200 | -1.26086000 | -0.00797100 |
| O  | -5.23241100 | 0.16215500  | -0.41438400 |
| O  | -5.09955100 | -1.48743500 | 1.46379000  |
| O  | -5.80494300 | -2.25011600 | -0.82044600 |
| C  | 4.26963200  | -0.96521400 | 0.03077300  |
| C  | 5.03929000  | -1.01433000 | 1.21700900  |
| C  | 4.93812500  | -1.37749500 | -1.14605800 |
| C  | 6.37360400  | -1.44174100 | 1.23428100  |
| H  | 4.58902100  | -0.71201900 | 2.16231300  |
| C  | 6.27174400  | -1.80776100 | -1.14629400 |
| H  | 4.40688400  | -1.36675800 | -2.09782200 |
| C  | 6.99833900  | -1.84174800 | 0.04838200  |
| H  | 6.92553600  | -1.46350000 | 2.17359100  |
| H  | 6.74334200  | -2.11730000 | -2.07860700 |
| H  | 8.03452200  | -2.17571100 | 0.05533700  |

Filename: CuPhPPh3SO3\_2

Sum of electronic and zero-point Energies = -56826.1223

**Figure S41 (cont'd):** Cartesian coordinates and energies (eV) for [(R)Cu(PPh<sub>2</sub>C<sub>6</sub>H<sub>4</sub>SO<sub>3</sub>)]<sup>-</sup>, R = Me, Et, Ph and CH<sub>2</sub>Ph.

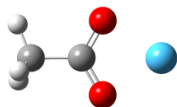

**[Cu(O<sub>2</sub>CMe)]<sup>-</sup>**

|    |             |             |             |
|----|-------------|-------------|-------------|
| Cu | 1.30636500  | -0.00250600 | 0.00167400  |
| O  | -0.44155700 | 1.11650400  | -0.00402300 |
| O  | -0.44521900 | -1.10518700 | -0.00418600 |
| C  | -1.06975100 | 0.00762900  | -0.00634600 |
| C  | -2.58401000 | -0.00059400 | 0.00224500  |
| H  | -2.98077900 | 1.00581800  | -0.14103000 |
| H  | -2.95445800 | -0.66978600 | -0.78037300 |
| H  | -2.93256500 | -0.39609500 | 0.96312600  |

Filename: CuCO2Me

Sum of electronic and zero-point Energies = -11586.8469

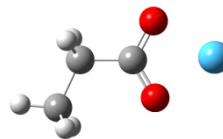

**[Cu(O<sub>2</sub>CEt)]<sup>-</sup>**

|    |             |             |             |
|----|-------------|-------------|-------------|
| O  | 0.20974700  | 1.25460000  | 0.00001900  |
| O  | -0.23668600 | -0.92072200 | -0.00002500 |
| C  | -0.62887200 | 0.28989200  | -0.00000600 |
| C  | -2.11282500 | 0.62523700  | -0.00002800 |
| H  | -2.29190900 | 1.26616700  | 0.87302500  |
| H  | -2.29189400 | 1.26606800  | -0.87315800 |
| C  | -3.05040400 | -0.58305700 | 0.00002800  |
| H  | -4.09519000 | -0.25011600 | -0.00001500 |
| H  | -2.88919100 | -1.21011500 | -0.88261400 |
| H  | -2.88923200 | -1.21000300 | 0.88275700  |
| Cu | 1.70432900  | -0.15605000 | 0.00000300  |

Filename: CuCO2Et

Sum of electronic and zero-point Energies = -12655.8755

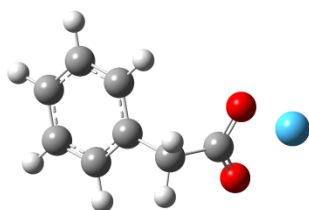

**[Cu(O<sub>2</sub>CCH<sub>2</sub>Ph)]<sup>-</sup>**

|    |             |             |             |
|----|-------------|-------------|-------------|
| O  | -1.52145300 | 1.20881300  | -0.21853100 |
| O  | -1.45679300 | -0.72670400 | 0.87187400  |
| C  | -0.97205800 | 0.42573400  | 0.62040900  |
| C  | 0.31107000  | 0.85705600  | 1.32642700  |
| H  | 0.32357200  | 1.94834400  | 1.38518200  |
| H  | 0.29014500  | 0.44821800  | 2.34171100  |
| C  | 1.54294800  | 0.35825400  | 0.58731000  |
| C  | 1.93389400  | -0.98638400 | 0.67774800  |
| C  | 2.30320100  | 1.23086200  | -0.20288100 |
| C  | 3.06154800  | -1.44640400 | -0.00620200 |
| H  | 1.34490100  | -1.67366000 | 1.28011600  |
| C  | 3.43343100  | 0.77285700  | -0.88726700 |
| H  | 2.00753800  | 2.27435300  | -0.28430500 |
| C  | 3.81612900  | -0.56764900 | -0.79089900 |
| H  | 3.35226500  | -2.49098500 | 0.07508500  |
| H  | 4.01346000  | 1.46422000  | -1.49366900 |
| H  | 4.69544100  | -0.92508700 | -1.32090500 |
| Cu | -2.92352800 | -0.30235300 | -0.52268400 |

Filename: CuCO2CH2Ph

Sum of electronic and zero-point Energies = -17872.0062

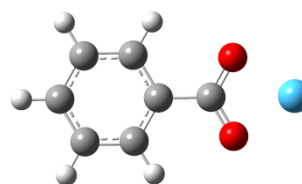

**[Cu(O<sub>2</sub>CPh)]<sup>-</sup>**

|    |             |             |             |
|----|-------------|-------------|-------------|
| O  | -1.08950800 | -1.11100300 | 0.00007300  |
| O  | -1.08945300 | 1.11110200  | 0.00003700  |
| C  | -0.45795000 | 0.00004100  | 0.00004400  |
| C  | 1.03553500  | 0.00001100  | 0.00002400  |
| C  | 1.73896700  | 1.21410100  | 0.00001600  |
| C  | 1.73893100  | -1.21410100 | 0.00000500  |
| C  | 3.13460800  | 1.21206200  | -0.00001100 |
| H  | 1.18122600  | 2.14483800  | 0.00003600  |
| C  | 3.13457300  | -1.21210400 | -0.00002600 |
| H  | 1.18116500  | -2.14482300 | 0.00001100  |
| C  | 3.83388200  | -0.00003200 | -0.00003400 |
| H  | 3.67711300  | 2.15401500  | -0.00001200 |
| H  | 3.67704900  | -2.15407300 | -0.00004400 |
| H  | 4.92116600  | -0.00004700 | -0.00005600 |
| Cu | -2.83301100 | -0.00001900 | -0.00003200 |

Filename: CuCO2Ph

Sum of electronic and zero-point Energies = -16803.0959

**Figure S42:** Cartesian coordinates and energies (eV) for [Cu(O<sub>2</sub>CR)]<sup>-</sup>, R = Me, Et, Ph and CH<sub>2</sub>Ph.

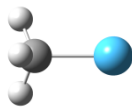

**[Cu(Me)]<sup>-</sup>**

|    |             |             |             |
|----|-------------|-------------|-------------|
| C  | 1.42044000  | 0.00000100  | -0.00002100 |
| H  | 1.76344600  | -0.89054200 | -0.53602600 |
| H  | 1.76325200  | 0.90956700  | -0.50316600 |
| H  | 1.76363500  | -0.01894800 | 1.03916700  |
| Cu | -0.47630900 | -0.00000300 | 0.00000500  |

Filename: CuMe

Sum of electronic and zero-point Energies = -6455.0007

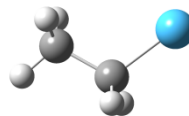

**[Cu(Et)]<sup>-</sup>**

|    |             |             |             |
|----|-------------|-------------|-------------|
| C  | 0.86796500  | 0.66177400  | 0.00000100  |
| H  | 0.89756700  | 1.30353000  | -0.88913900 |
| H  | 0.89759000  | 1.30355300  | 0.88912300  |
| C  | 1.99973700  | -0.36779300 | 0.00000000  |
| H  | 2.97985600  | 0.13690700  | -0.00002700 |
| H  | 1.96914700  | -1.01477500 | 0.88400100  |
| H  | 1.96911400  | -1.01480700 | -0.88397500 |
| Cu | -0.89377500 | -0.08545800 | 0.00000000  |

Filename: CuEt

Sum of electronic and zero-point Energies = -6455.0007

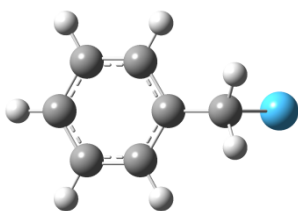

**[Cu(CH<sub>2</sub>Ph)]<sup>-</sup>**

|    |             |             |             |
|----|-------------|-------------|-------------|
| C  | 0.96957800  | -0.00001900 | 1.04417600  |
| H  | 1.20764600  | -0.89513700 | 1.62788500  |
| H  | 1.20765000  | 0.89507000  | 1.62792700  |
| C  | -0.42309200 | -0.00000700 | 0.52082500  |
| C  | -1.11047400 | -1.20552800 | 0.27546500  |
| C  | -1.11046100 | 1.20552300  | 0.27548100  |
| C  | -2.42401100 | -1.20691200 | -0.19555200 |
| H  | -0.60317200 | -2.15100600 | 0.45809800  |
| C  | -2.42399900 | 1.20692100  | -0.19553700 |
| H  | -0.60315500 | 2.15099600  | 0.45812500  |
| C  | -3.09006700 | 0.00000900  | -0.43635700 |
| H  | -2.93090700 | -2.15279300 | -0.37242500 |
| H  | -2.93088700 | 2.15280700  | -0.37240500 |
| H  | -4.11328200 | 0.00001800  | -0.80294800 |
| Cu | 2.29107800  | 0.00000400  | -0.35707800 |

Filename: CuCH2Ph

Sum of electronic and zero-point Energies = -12740.2902

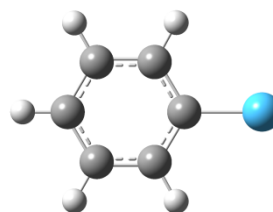

**[Cu(Ph)]<sup>-</sup>**

|    |             |             |             |
|----|-------------|-------------|-------------|
| C  | 0.08627900  | 0.00000300  | 0.00017000  |
| C  | -0.63132300 | -1.20914200 | 0.00011300  |
| C  | -0.63132400 | 1.20914500  | 0.00011500  |
| C  | -2.03216700 | -1.20779300 | -0.00002700 |
| H  | -0.10840900 | -2.16191300 | 0.00017900  |
| C  | -2.03216800 | 1.20779100  | -0.00003300 |
| H  | -0.10841300 | 2.16191600  | 0.00020400  |
| C  | -2.73580300 | -0.00000100 | -0.00011300 |
| H  | -2.57086600 | -2.15318500 | -0.00004100 |
| H  | -2.57086700 | 2.15318200  | -0.00005300 |
| H  | -3.82321300 | -0.00000100 | -0.00021400 |
| Cu | 1.96692400  | 0.00000000  | -0.00004900 |

Filename: CuPh

Sum of electronic and zero-point Energies = -11671.0131

**Figure S43:** Cartesian coordinates and energies (eV) for [Cu(R)]<sup>-</sup>, R = Me, Et, Ph and CH<sub>2</sub>Ph.

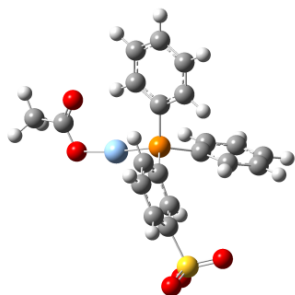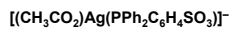

|    |             |             |             |
|----|-------------|-------------|-------------|
| P  | 0.37335900  | 0.47994200  | 0.01096600  |
| C  | 1.21944500  | 1.78593200  | -0.98539500 |
| C  | 2.54186600  | 1.58587000  | -1.41179900 |
| C  | 0.56592900  | 2.98743300  | -1.31091000 |
| C  | 3.19634700  | 2.57427600  | -2.15727300 |
| H  | 3.07292200  | 0.66828300  | -1.16445900 |
| C  | 1.22221700  | 3.96978100  | -2.05262100 |
| H  | -0.45772700 | 3.15564700  | -0.98787600 |
| C  | 2.54053600  | 3.76407600  | -2.47817600 |
| H  | 4.22031100  | 2.40507300  | -2.48031300 |
| H  | 0.70527800  | 4.89422300  | -2.29894600 |
| H  | 3.05116700  | 4.53088300  | -3.05631400 |
| C  | -0.19316200 | 1.37323500  | 1.52375600  |
| C  | -1.43455700 | 2.02369100  | 1.60857700  |
| C  | 0.68028300  | 1.42443700  | 2.62256400  |
| C  | -1.78973900 | 2.71474200  | -2.77013000 |
| H  | -2.14234500 | 1.96992700  | 0.78745600  |
| C  | 0.32819800  | 2.12559600  | 3.77751000  |
| H  | 1.63650800  | 0.90760000  | 2.57767000  |
| C  | -0.90947200 | 2.77150300  | 3.85396700  |
| H  | -2.76441400 | 3.19187300  | -2.82811300 |
| H  | 1.01397200  | 2.15264800  | 4.62104300  |
| H  | -1.19296300 | 3.30283400  | 4.75930400  |
| C  | -1.14273600 | 0.05291200  | -0.92837400 |
| C  | -2.24087500 | -0.50644000 | -0.25330600 |
| C  | -1.19080000 | 0.20543100  | -2.32510000 |
| C  | -3.39573700 | -0.85441800 | -0.95827500 |
| H  | -2.22746300 | -0.66966400 | 0.81875800  |
| C  | -2.33509600 | -0.18537700 | -3.02579700 |
| H  | -0.34579300 | 0.62425600  | -2.86374000 |
| C  | -3.44141300 | -0.70278900 | -2.34638300 |
| H  | -2.36374400 | -0.07343800 | -4.10772000 |
| H  | -4.34344000 | -0.99891300 | -2.87344900 |
| S  | -4.87835700 | -1.39377800 | -0.02927500 |
| O  | -5.47981400 | -0.09739500 | 0.40209500  |
| O  | -4.32949400 | -2.21324800 | 1.08590600  |
| O  | -5.68479000 | -2.14469800 | -1.03030400 |
| O  | 4.57884400  | -1.30304800 | -0.52594700 |
| O  | 3.43101100  | -2.76935600 | 0.73853600  |
| C  | 4.49202400  | -2.36833900 | 0.11700400  |
| C  | 5.68682100  | -3.31408300 | 0.21375200  |
| H  | 6.55297400  | -2.89825000 | -0.30685500 |
| H  | 5.93649500  | -3.49295900 | 1.26600900  |
| H  | 5.42492600  | -4.28426500 | -0.22466100 |
| Ag | 1.91808800  | -1.28994300 | 0.42840600  |

Filename: AgCO2MePPh3SO3\_5  
 Sum of electronic and zero-point Energies = -55372.0571

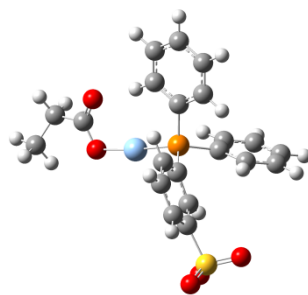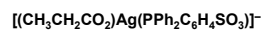

|    |              |             |             |
|----|--------------|-------------|-------------|
| P  | 0.11993300   | 0.65390600  | 0.01685300  |
| C  | 0.76663300   | 2.10119600  | -0.93242900 |
| C  | 2.09635600   | 2.09762700  | -1.38238100 |
| C  | -0.04690200  | 3.21643300  | -1.19887900 |
| C  | 2.60002900   | 3.19406000  | -2.09312100 |
| H  | 2.74930600   | 1.25046600  | -1.17970100 |
| C  | 0.45944100   | 4.30699000  | -1.90611600 |
| H  | -1.07794800  | 3.23283700  | -0.85653400 |
| C  | 1.78578400   | 4.29714100  | -2.35567500 |
| H  | 3.63170800   | 3.17696000  | -2.43493900 |
| H  | -0.218037900 | 5.16303800  | -2.10687900 |
| H  | 2.17940200   | 5.14818600  | -2.90682500 |
| C  | -0.54235500  | 1.40159500  | 1.56922400  |
| C  | -1.86141600  | 1.86632200  | 1.69307200  |
| C  | 0.33294400   | 1.53457500  | 2.65970400  |
| C  | -2.29152300  | 2.45583900  | 2.88492400  |
| H  | -2.56774500  | 1.74420600  | 0.87805700  |
| C  | -0.09550100  | 2.13500800  | 3.84538700  |
| H  | 1.35160700   | 1.16022500  | -2.58406200 |
| C  | -1.41054300  | 2.59580700  | 3.96055700  |
| H  | -3.32266300  | 2.78770900  | -2.97221900 |
| H  | 0.59330000   | 2.22720300  | 4.68157900  |
| H  | -1.75130900  | 3.04718900  | 4.88923600  |
| C  | -1.33639400  | 0.06057500  | -0.92667700 |
| C  | -2.33545900  | -0.67469400 | -0.26854200 |
| C  | -1.42742500  | 0.26493700  | -2.31458300 |
| C  | -3.44201800  | -1.14941300 | -0.97496100 |
| H  | -2.28226700  | -0.88065600 | 0.79693000  |
| C  | -2.51754000  | -0.25095100 | -3.02080500 |
| H  | -0.65739900  | 0.82007000  | -2.84223900 |
| C  | -3.53042200  | -0.94602300 | -2.35439800 |
| H  | -2.57868400  | -0.09773200 | -4.09630000 |
| H  | -4.39091700  | -1.34197700 | -2.88535300 |
| S  | -4.82060800  | -1.92937200 | -0.05666500 |
| O  | -5.59052500  | -0.74910900 | 0.43591000  |
| O  | -4.14586500  | -2.70952000 | 1.01688200  |
| O  | -5.52935300  | -2.74354100 | -1.08186500 |
| O  | 4.49988700   | -0.52752000 | -0.61631800 |
| O  | 3.59697900   | -2.18570200 | 0.60389200  |
| C  | 4.57995400   | -1.61760600 | -0.01193400 |
| C  | 5.93050900   | -2.34042800 | 0.05668100  |
| H  | 6.49585600   | -2.06830200 | -0.84181900 |
| H  | 6.47581000   | -1.90026800 | 0.90518000  |
| Ag | 1.89677000   | -0.90352600 | 0.35113300  |
| C  | 5.84976600   | -3.86082500 | 0.22557400  |
| H  | 6.85530100   | -4.29783100 | 0.29119500  |
| H  | 5.29331800   | -4.12432300 | 1.12999400  |
| H  | 5.33377100   | -4.32575500 | -0.62298300 |

Filename: AgCO2EtPPh3SO3\_3  
 Sum of electronic and zero-point Energies = -56441.0707

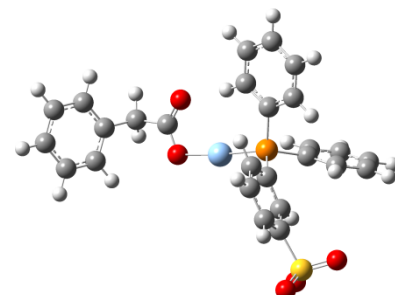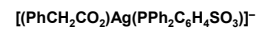

|    |             |             |             |
|----|-------------|-------------|-------------|
| P  | 0.91262500  | 0.86272400  | 0.06977600  |
| C  | 0.60954500  | 2.16225700  | 1.34885600  |
| C  | -0.69987500 | 2.60850300  | 1.58613800  |
| C  | 1.67188900  | 2.73361400  | 2.07109900  |
| C  | -0.94034800 | 3.61054200  | 2.53405200  |
| H  | -1.53876800 | 2.18448800  | 1.03732800  |
| C  | 1.42806600  | 3.73196000  | 3.01436200  |
| H  | 2.69009900  | 2.39378100  | 1.90367600  |
| C  | 0.11949000  | 4.17844000  | 3.24758700  |
| H  | -1.96007300 | 3.94458800  | 2.70740300  |
| H  | 2.25824100  | 4.16397700  | 3.56803400  |
| H  | -0.06924900 | 4.95066800  | 3.98396200  |
| C  | 2.01202700  | 1.69252100  | -1.15792800 |
| C  | 3.40552200  | 1.77135700  | -1.00191500 |
| C  | 1.41517800  | 2.30284200  | -2.27286900 |
| C  | 4.18256500  | 2.45086200  | -1.94299200 |
| H  | 3.89575800  | 1.27837300  | -0.16843500 |
| C  | 2.19274700  | 2.99142600  | -3.20690300 |
| H  | 0.33883400  | 2.23454800  | -2.41505600 |
| C  | 3.57891300  | 3.06530300  | -3.04385900 |
| H  | 5.26191300  | 2.48076700  | -1.82045800 |
| H  | 1.71577500  | 3.45522300  | -4.06680900 |
| H  | 4.18784600  | 3.58584500  | -3.77904100 |
| C  | 1.93197600  | -0.41351500 | 0.90234100  |
| C  | 2.83113900  | -1.19373700 | 0.15859100  |
| C  | 1.75282800  | -0.67884900 | -2.27199500 |
| C  | 3.58581100  | -2.18808700 | 0.78467700  |
| H  | 2.97140300  | -1.04195000 | -0.90763100 |
| C  | 2.48376700  | -1.70155300 | 2.88116900  |
| H  | 1.05048400  | -0.09471700 | 2.85999900  |
| C  | 3.40824200  | -2.44867500 | 2.14515600  |
| H  | 2.33583900  | -1.90753700 | 3.93922300  |
| H  | 3.99371300  | -3.23914900 | 2.60504600  |
| S  | 4.88334700  | -3.05787400 | -0.17058100 |
| O  | 6.02636800  | -2.09943300 | -0.11403600 |
| O  | 4.28838200  | -3.21891700 | -1.52595900 |
| O  | 5.10241000  | -4.32452700 | 0.58013300  |
| O  | -3.67963500 | 1.40660800  | -0.25846800 |
| O  | -3.13495900 | -0.36551100 | -1.53907600 |
| C  | -3.97465700 | 0.46760700  | -1.02031100 |
| C  | -5.44793800 | 0.22260600  | -1.40176900 |
| H  | -5.99728400 | 1.15733100  | -1.25865500 |
| H  | -5.48397400 | -0.04798600 | -2.46331200 |
| Ag | -1.18345600 | 0.15137300  | -0.82194400 |
| C  | -6.07814400 | -0.87977100 | -0.57187700 |
| C  | -5.77148400 | -2.22875500 | -0.81474300 |
| C  | -6.97032000 | -0.57513800 | 0.46643900  |
| C  | -6.34409800 | -3.24210000 | -0.04283100 |
| H  | -5.06487800 | -2.47600900 | -1.60264600 |
| C  | -7.54583400 | -1.58746500 | 1.24158600  |
| H  | -7.20984400 | 0.46590200  | 0.67265700  |
| C  | -7.23574900 | -2.92640700 | 0.98873600  |
| H  | -6.09030900 | -4.28044000 | -0.24436100 |
| H  | -8.23364000 | -1.32794200 | 2.04360200  |
| H  | -7.68047000 | -3.71607800 | 1.59003600  |

Filename: AgCO2CH2PhPPh3SO3\_3  
 Sum of electronic and zero-point Energies = -61657.2555

**Figure S44:** Cartesian coordinates and energies (eV) for  $[(RCO_2)Ag(PPh_2C_6H_4SO_3)]^-$ , R = Me, Et, Ph and  $CH_2Ph$ .

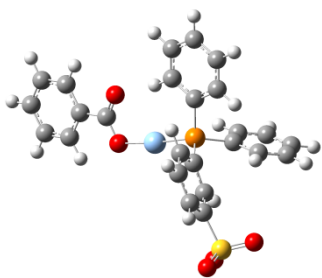

$[(\text{PhCO}_2)\text{Ag}(\text{PPh}_2\text{C}_6\text{H}_4\text{SO}_3)]^-$

|    |             |             |             |
|----|-------------|-------------|-------------|
| P  | -0.72070700 | 0.79300000  | 0.03783300  |
| C  | -0.37004500 | 2.38397000  | -0.83264600 |
| C  | 0.93469000  | 2.66463500  | -1.26728700 |
| C  | -1.38632400 | 3.33075900  | -1.05039900 |
| C  | 1.21414800  | 3.87292900  | -1.91727300 |
| H  | 1.74067000  | 1.95280800  | -1.09871400 |
| C  | -1.10355300 | 4.53347900  | -1.69803400 |
| H  | -2.40052100 | 3.12771100  | -0.71738700 |
| C  | 0.19909300  | 4.80651900  | -2.13377300 |
| H  | 2.22929400  | 4.07622700  | -2.24836900 |
| H  | -1.89866800 | 5.25680200  | -1.86235600 |
| H  | 0.41826600  | 5.74478600  | -2.63824600 |
| C  | -1.49479700 | 1.31871900  | 1.62880300  |
| C  | -2.87837800 | 1.49912500  | 1.78407700  |
| C  | -0.64603800 | 1.57787400  | 2.71769400  |
| C  | -3.39894600 | 1.93300500  | 3.00638000  |
| H  | -3.55886800 | 1.27365200  | 0.96918800  |
| C  | -1.16737500 | 2.02359800  | 3.93392600  |
| H  | 0.42626700  | 1.42444700  | 2.61684400  |
| C  | -2.54665300 | 2.20022300  | 4.08095200  |
| H  | -4.47440300 | 2.04300100  | 3.11706900  |
| H  | -0.49748900 | 2.21660300  | 4.76824700  |
| H  | -2.95615200 | 2.52944000  | 5.03290100  |
| C  | -2.04576900 | -0.02041600 | -0.93358200 |
| C  | -2.86837300 | -0.97419700 | -0.31325600 |
| C  | -2.19991600 | 0.23946400  | -2.30675500 |
| C  | -3.87281100 | -1.61768300 | -1.03866100 |
| H  | -2.75643200 | -1.22422100 | 0.73819200  |
| C  | -3.17944000 | -0.44163100 | -3.03451800 |
| H  | -1.56374500 | 0.96411300  | -2.80641700 |
| C  | -4.02426500 | -1.35883200 | -2.40307600 |
| H  | -3.28871900 | -0.24380300 | -4.09884800 |
| H  | -4.80018300 | -1.88594000 | -2.95015400 |
| S  | -5.05190100 | -2.70450000 | -0.15527200 |
| O  | -6.00100500 | -1.72541300 | 0.45211000  |
| O  | -4.20598900 | -3.42827000 | 0.83311700  |
| O  | -5.64182000 | -3.55289900 | -1.22672300 |
| O  | 3.85783900  | 0.53058700  | -0.55360900 |
| O  | 3.22217000  | -1.37041600 | 0.47088800  |
| C  | 4.10594400  | -0.58269700 | -0.04640000 |
| Ag | 1.31656600  | -0.42069000 | 0.28897400  |
| C  | 5.53181300  | -1.08795600 | -0.01078900 |
| C  | 5.83999300  | -2.34584300 | 0.52718500  |
| C  | 6.56445500  | -0.28965700 | -0.52288800 |
| C  | 7.16181300  | -2.79843600 | 0.55188800  |
| H  | 5.03239100  | -2.95522500 | 0.91966100  |
| C  | 7.88626300  | -0.74033900 | -0.49704700 |
| H  | 6.30814800  | 0.68073100  | -0.93679600 |
| C  | 8.18834500  | -1.99679700 | 0.04058900  |
| H  | 7.39133000  | -3.77647600 | 0.96924800  |
| H  | 8.68091700  | -0.11355000 | -0.89625300 |
| H  | 9.21751100  | -2.34924900 | 0.06032400  |

Filename: AgCO2PhPPh3SO3\_2

Sum of electronic and zero-point Energies = -60588.3431

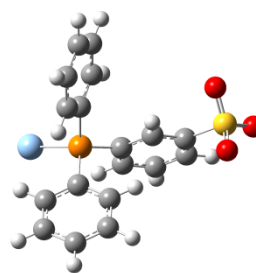

$[\text{Ag}(\text{PPh}_2\text{C}_6\text{H}_4\text{SO}_3)]^-$

|    |             |             |             |
|----|-------------|-------------|-------------|
| P  | -1.06742700 | -0.01083100 | -0.22183300 |
| C  | -1.52556000 | -1.08227600 | 1.19114700  |
| C  | -2.87314200 | -1.36835100 | 1.46150700  |
| C  | -0.52187000 | -1.60324100 | 2.02669300  |
| C  | -3.21860600 | -2.15584900 | 2.56193200  |
| H  | -3.65725000 | -0.97994200 | 0.81375400  |
| C  | -0.87437800 | -2.39124300 | 3.12472300  |
| H  | 0.52714700  | -1.40412800 | 1.82826400  |
| C  | -2.21815400 | -2.66750000 | 3.39415100  |
| H  | -4.26392400 | -2.37359800 | 2.76353000  |
| H  | -0.09218000 | -2.79020500 | 3.76419200  |
| H  | -2.48521300 | -3.28552400 | 4.24707800  |
| C  | -0.91523800 | 1.69813400  | 0.40536700  |
| C  | -1.53447000 | 2.08509800  | 1.60506900  |
| C  | -0.19995100 | 2.64609400  | -0.34842400 |
| C  | -1.43037900 | 3.40576700  | 2.04778400  |
| H  | -2.07742900 | 1.35974200  | 2.20325300  |
| C  | -0.09469700 | 3.96055100  | 0.10511900  |
| H  | 0.30456500  | 2.35517300  | -1.26551700 |
| C  | -0.71124700 | 4.34289300  | 1.30117300  |
| H  | -1.89841000 | 3.69578300  | 2.98442100  |
| H  | 0.48569000  | 4.67893700  | -0.46631600 |
| H  | -0.61961300 | 5.36576100  | 1.65571200  |
| C  | 0.54247400  | -0.53029400 | -0.86158400 |
| C  | 1.71034200  | -0.08756200 | -0.22328300 |
| C  | 0.62366500  | -1.44732300 | -1.92784200 |
| C  | 2.95306800  | -0.57481300 | -0.63075700 |
| H  | 1.68083200  | 0.63004500  | 0.59114300  |
| C  | 1.87215100  | -1.91304600 | -2.33833900 |
| C  | -0.27818500 | -1.79557500 | -2.42897000 |
| C  | 3.03623900  | -1.48200000 | -1.68759800 |
| H  | 1.93962500  | -2.61256300 | -3.16779500 |
| H  | 4.01821800  | -1.83285800 | -1.99148000 |
| S  | 4.42777300  | -0.02779000 | 0.31139800  |
| O  | 4.20470200  | -0.68743700 | 1.62825300  |
| O  | 4.27578600  | 1.45183600  | 0.33317000  |
| O  | 5.56979800  | -0.54765600 | -0.47934600 |
| Ag | -2.73490600 | -0.15208800 | -1.96348500 |

Filename: AgPPh3SO3

Sum of electronic and zero-point Energies = -49150.8208

**Figure S44 (cont'd):** Cartesian coordinates and energies (eV) for  $[(\text{RCO}_2)\text{Ag}(\text{PPh}_2\text{C}_6\text{H}_4\text{SO}_3)]^-$ , R = Me, Et, Ph and  $\text{CH}_2\text{Ph}$ , and for  $[\text{Ag}(\text{PPh}_2\text{C}_6\text{H}_4\text{SO}_3)]^-$ .

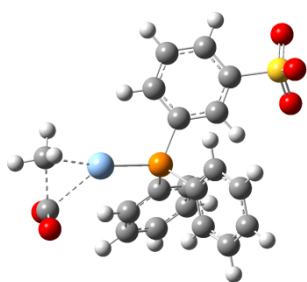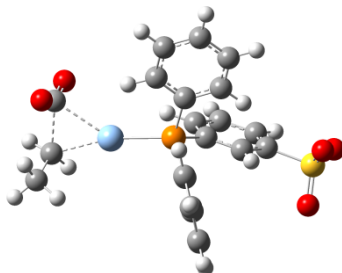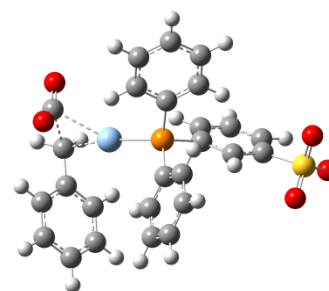

TS  $[(\text{CH}_3\text{CO}_2)\text{Ag}(\text{PPh}_2\text{C}_6\text{H}_4\text{SO}_3)]^- \rightarrow$   
 $[(\text{CH}_3)\text{Ag}(\text{PPh}_2\text{C}_6\text{H}_4\text{SO}_3)]^-$   
(-377 cm<sup>-1</sup>)

|    |             |             |             |
|----|-------------|-------------|-------------|
| O  | 5.53827500  | -0.63236500 | 1.09954100  |
| C  | 5.00055100  | -0.81120800 | 0.03030600  |
| O  | 4.88442900  | -0.32940100 | -1.08807800 |
| C  | 4.23156700  | -2.66284000 | 0.11552700  |
| H  | 3.52533600  | -3.21659400 | -0.53211100 |
| H  | 5.21271800  | -2.93099700 | -0.28714000 |
| H  | 4.18220000  | -1.81870600 | 1.14803600  |
| P  | 0.45067300  | 0.11895600  | -0.00665300 |
| Ag | 2.49314200  | -1.15856600 | 0.04723100  |
| C  | 0.56427000  | 1.49680400  | -1.22718400 |
| C  | -0.57379300 | 2.21912200  | -1.62743500 |
| C  | 1.81747000  | 1.83073300  | -1.76587800 |
| C  | -0.45342900 | 3.26420800  | -2.54485800 |
| H  | -1.55559600 | 1.96661100  | -1.23837200 |
| C  | 1.93256200  | 2.88162100  | -2.68238000 |
| H  | 2.70734200  | 1.27216400  | -1.48388700 |
| C  | 0.79925300  | 3.59895000  | -3.07188600 |
| H  | -1.34194800 | 3.81104300  | -2.84964900 |
| H  | 2.90878200  | 3.12771100  | -3.09223700 |
| C  | 0.88795100  | 4.41206200  | -3.78862800 |
| H  | -1.05241300 | -0.83486600 | -0.42529700 |
| C  | -2.33673900 | -0.36681700 | -0.10796900 |
| C  | -0.91139700 | -2.04181300 | -1.13382400 |
| C  | -3.46751500 | -1.08325600 | -0.50440100 |
| H  | -2.48247500 | 0.55520000  | 0.44654700  |
| C  | -2.04614400 | -2.75360100 | -1.52839100 |
| H  | 0.07946600  | -2.41832600 | -1.37864000 |
| C  | -3.32353800 | -2.27546400 | -1.21732800 |
| H  | -1.93221100 | -3.68440900 | -2.07975500 |
| H  | -4.21861200 | -2.80815600 | -1.52452000 |
| C  | 0.10154500  | 0.93784200  | 1.60622400  |
| C  | -0.55494000 | 0.22900800  | 2.62648500  |
| C  | 0.57158700  | 2.23412000  | 1.86824500  |
| C  | -0.74861500 | 0.81371800  | 3.87921300  |
| H  | -0.93969600 | -0.76947700 | 2.43986800  |
| C  | 0.38155300  | 2.81303400  | 3.12573300  |
| H  | 1.08036400  | 2.79757900  | 1.09141700  |
| C  | -0.27993500 | 2.10610800  | 4.13307400  |
| H  | -1.28003600 | 0.26167500  | 6.464975100 |
| H  | 0.74554600  | 3.82034900  | 3.31239000  |
| H  | -0.43680400 | 2.56158900  | 5.10762800  |
| S  | -5.12171900 | -0.44865100 | -0.04224100 |
| O  | -6.05275200 | -1.16754900 | -0.95432400 |
| O  | -5.24449300 | -0.82126000 | -1.39543300 |
| O  | -5.00595800 | 1.01744400  | -0.28696500 |

Filename: TS\_AgCO2MePpPh3SO3\_2  
Sum of electronic and zero-point Energies = -55370.3488

TS  $[(\text{CH}_3\text{CH}_2\text{CO}_2)\text{Ag}(\text{PPh}_2\text{C}_6\text{H}_4\text{SO}_3)]^- \rightarrow$   
 $[(\text{CH}_3\text{CH}_2)\text{Ag}(\text{PPh}_2\text{C}_6\text{H}_4\text{SO}_3)]^-$   
(-334 cm<sup>-1</sup>)

|    |             |             |             |
|----|-------------|-------------|-------------|
| O  | -4.24120800 | -1.54184000 | -2.00850300 |
| C  | -4.64714500 | -0.96611000 | -1.01148200 |
| O  | -5.32779500 | -0.02271700 | -0.66061500 |
| C  | -4.31857200 | -2.12492200 | -0.63731900 |
| H  | -5.05097700 | -2.75443100 | 0.12319000  |
| H  | -3.48858200 | -2.83510100 | 0.82620000  |
| P  | -0.31390300 | 0.26851500  | 0.02147600  |
| C  | 0.13515300  | 0.93350700  | 1.68134300  |
| C  | -0.17245700 | 2.25486200  | 2.03960000  |
| C  | 0.70948400  | 0.08137400  | 2.63967700  |
| C  | 0.09498100  | 2.71662100  | 3.33155500  |
| H  | -0.61223000 | 2.92949900  | 1.31081500  |
| C  | 0.98218100  | 0.54844800  | 3.92630100  |
| H  | -0.97177600 | -0.93972300 | 2.37726900  |
| C  | 0.67383200  | 1.86649400  | 4.27690300  |
| H  | -0.14108500 | 3.74538900  | 3.59245900  |
| H  | 1.45106500  | -0.11550600 | 4.64755000  |
| H  | 0.89338700  | 2.23029700  | 5.27753500  |
| C  | -0.35648600 | 1.74202000  | -1.08472300 |
| C  | 0.82405400  | 2.38888200  | -1.49013200 |
| C  | -1.59524600 | 2.22770400  | -1.53189800 |
| C  | 0.75911000  | 3.50904800  | -2.32071900 |
| H  | 1.79433500  | 2.01907500  | -1.17190300 |
| C  | -1.65605000 | 3.35207800  | -2.36142800 |
| H  | -2.51651100 | 1.72661200  | -1.24384300 |
| C  | -0.47963100 | 3.99373300  | -2.75575600 |
| H  | 1.67950500  | 3.99693600  | -2.63089900 |
| H  | -2.62232800 | 3.71349900  | -2.70365300 |
| H  | -0.52510700 | 4.86364300  | -3.40672400 |
| C  | 1.10721400  | -0.74947000 | -0.51258200 |
| C  | 0.86611000  | -1.86023600 | -1.34204800 |
| C  | 2.42483900  | -0.41983800 | -0.16108700 |
| C  | 1.93995100  | -2.61531900 | -1.81780100 |
| H  | -0.15159400 | -2.12642900 | -1.61940200 |
| C  | 3.49350600  | -1.18118500 | -0.63825900 |
| H  | 2.64420400  | 0.42682000  | 0.48232400  |
| C  | 3.25230800  | -2.27774900 | -1.46851000 |
| H  | 1.75063800  | -3.47046000 | -2.46280400 |
| H  | 4.10102800  | -2.84733000 | -1.83532100 |
| S  | 5.19291900  | -0.73031900 | -0.12759100 |
| O  | 5.27017300  | -1.21532500 | 1.27961300  |
| O  | 6.06610400  | -1.45928400 | -1.08754200 |
| O  | 5.20795100  | 0.75442100  | -0.26385000 |
| C  | -4.89864300 | -1.54420800 | 1.92616100  |
| H  | -5.48468000 | -2.28958200 | 2.48688300  |
| H  | -4.11940300 | -1.16861300 | 2.60161200  |
| H  | -5.56289200 | -0.70493100 | 1.69032000  |
| Ag | -2.42598900 | -0.89614300 | 0.07511200  |

Filename: TS\_AgCO2EtPpPh3SO3  
Sum of electronic and zero-point Energies = -56439.2744

TS  $[(\text{PhCH}_2\text{CO}_2)\text{Ag}(\text{PPh}_2\text{C}_6\text{H}_4\text{SO}_3)]^- \rightarrow$   
 $[(\text{PhCH}_2)\text{Ag}(\text{PPh}_2\text{C}_6\text{H}_4\text{SO}_3)]^-$   
(-276 cm<sup>-1</sup>)

|    |             |             |             |
|----|-------------|-------------|-------------|
| O  | -4.10708900 | 2.35997300  | -2.12141900 |
| C  | -4.14571600 | 1.68029200  | -1.11890000 |
| O  | -4.35176600 | 1.73698400  | 0.08573600  |
| C  | -4.09503600 | -0.25440100 | -1.74511200 |
| H  | -5.12551300 | 0.00177600  | -2.00099800 |
| H  | -3.56059400 | -0.38173100 | -2.69295400 |
| P  | 0.18969000  | 0.60577200  | 0.19548000  |
| C  | 0.37746500  | -0.23834400 | 1.82033200  |
| C  | 1.24852800  | 0.23457000  | 2.81395100  |
| C  | -0.36096500 | -1.40959100 | 2.05648700  |
| C  | 1.38783800  | -0.46120600 | 4.01740500  |
| H  | 1.82355700  | 1.14123500  | 2.65155400  |
| H  | -0.21787300 | -2.10337400 | 3.25947800  |
| C  | -1.05074700 | -1.78384900 | 1.30362000  |
| C  | 0.65770000  | -1.63112800 | 4.24155400  |
| H  | 2.07690000  | -0.09237000 | 4.77264000  |
| H  | -0.79346500 | -3.00994900 | 3.42684800  |
| H  | 0.77219200  | -2.17372000 | 5.17664600  |
| C  | 0.65708600  | 2.36083400  | 0.50816000  |
| C  | 1.96467200  | 2.83387800  | 0.31455200  |
| C  | -0.33755900 | 3.24804300  | 0.95434600  |
| C  | 2.27207000  | 4.17246900  | 0.57780100  |
| H  | 2.74472900  | 2.16841400  | -0.04344800 |
| C  | -0.02473400 | 4.58255600  | 1.23199400  |
| H  | -1.36079400 | 2.90219300  | 1.08478500  |
| C  | 1.28137400  | 5.04693800  | 1.03236400  |
| H  | 3.28862600  | 4.52506300  | 0.42382500  |
| H  | -0.80481200 | 5.25911700  | 1.55962300  |
| H  | 1.52315100  | 6.08829600  | 1.23139700  |
| C  | 1.48899100  | -0.07703300 | -0.89594400 |
| C  | 1.25458300  | -0.11325300 | -2.28270900 |
| C  | 2.72698700  | -0.49967400 | -0.39026400 |
| C  | 2.25984600  | -0.55563400 | -3.14455600 |
| H  | 0.29384300  | 0.20326100  | -2.68358100 |
| C  | 3.73633500  | -0.91919600 | -1.26048600 |
| H  | 2.92851800  | -0.51322000 | 0.67653100  |
| C  | 3.50221000  | -0.95174000 | -2.63670200 |
| H  | 2.07292600  | -0.59044200 | -4.21566700 |
| H  | 4.29782500  | -1.29701600 | -3.29021700 |
| S  | 5.38594100  | -1.32176600 | -0.57532300 |
| O  | 5.95961900  | 0.02735600  | -0.29674900 |
| O  | 5.08296300  | -2.11864000 | 0.64542400  |
| O  | 6.06325000  | -2.07098500 | -1.66862500 |
| C  | -4.05629900 | -1.45833600 | -0.86052900 |
| C  | -4.88066200 | -1.54823800 | 0.28301500  |
| C  | -3.19511300 | -2.54681000 | -1.12922700 |
| C  | -4.84514400 | -2.67148100 | 1.11037500  |
| H  | -5.53612600 | -0.71560700 | 0.52304500  |
| C  | -3.16066000 | -3.66997400 | -0.29940300 |
| H  | -2.55596800 | -2.51317000 | -2.01001200 |
| C  | -3.98629200 | -3.74073400 | 0.82778100  |
| H  | -5.49104500 | -2.71115000 | 1.98513600  |
| H  | -2.48986500 | -4.49237000 | -0.53842600 |
| H  | -3.96231900 | -4.61497800 | 1.47384700  |
| Ag | -2.04989400 | 0.41122700  | -0.66678100 |

Filename: TS\_AgCO2CH2PhPpPh3SO3\_2  
Sum of electronic and zero-point Energies = -61655.6445

**Figure S45:** Cartesian coordinates and transition state energies (eV) for decarboxylation from  $[(\text{RCO}_2)\text{Ag}(\text{P}^*)]^-$  (R = Me, Et, Ph, CH<sub>2</sub>Ph).



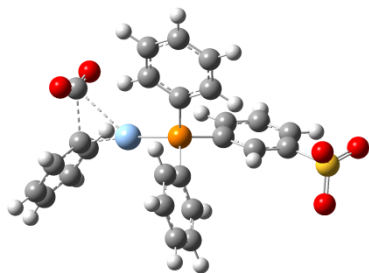

TS  $[(\text{PhCO}_2)\text{Ag}(\text{PPh}_2\text{C}_6\text{H}_4\text{SO}_3)]^- \rightarrow [(\text{Ph})\text{Ag}(\text{PPh}_2\text{C}_6\text{H}_4\text{SO}_3)]^-$   
 (-262  $\text{cm}^{-1}$ )

|    |             |             |             |
|----|-------------|-------------|-------------|
| O  | -4.10860500 | 0.33501700  | -2.68506100 |
| C  | -4.22921800 | 0.78073300  | -1.57280600 |
| O  | -4.44940700 | 1.75202400  | -0.88952400 |
| P  | 0.23168800  | 0.50584200  | 0.12668000  |
| C  | 0.68972400  | 0.49037200  | 1.91251200  |
| C  | 0.60113500  | 1.65256300  | 2.69388700  |
| C  | 1.04041300  | -0.72244800 | 2.52941900  |
| C  | 0.86550700  | 1.60346100  | 4.06561100  |
| H  | 0.33645400  | 2.60031700  | 2.23413400  |
| C  | 1.31077800  | -0.76609300 | 3.89799800  |
| H  | 1.13014000  | -1.63048900 | 1.93974700  |
| C  | 1.22236900  | 0.39592500  | 4.67065100  |
| H  | 0.80183200  | 2.51396000  | 4.65654800  |
| H  | 1.60562000  | -1.70713900 | 4.35451200  |
| H  | 1.44050800  | 0.36113400  | 5.73511300  |
| C  | 0.52614400  | 2.24185900  | -0.42115000 |
| C  | 1.82685000  | 2.75659500  | -0.56287300 |
| C  | -0.57410400 | 3.06769000  | -0.70097700 |
| C  | 2.01714200  | 4.07868200  | -0.96868000 |
| H  | 2.69324800  | 2.13123000  | -0.36899300 |
| C  | -0.37889900 | 4.39258400  | -1.10497100 |
| H  | -1.58709800 | 2.68136800  | -0.61474000 |
| C  | 0.91586400  | 4.89925700  | -1.23812900 |
| H  | 3.02813000  | 4.46235400  | -1.07884500 |
| H  | -1.24085500 | 5.01794400  | -1.32289100 |
| H  | 1.06894000  | 5.92712100  | -1.55861100 |
| C  | 1.48057800  | -0.52941200 | -0.71666300 |
| C  | 1.09613600  | -1.24895100 | -1.86267500 |
| C  | 2.81389900  | -0.57967800 | -0.28235900 |
| C  | 2.04630000  | -1.99313200 | -2.56532800 |
| H  | 0.06398100  | -1.22186000 | -2.20519700 |
| C  | 3.75820500  | -1.32690800 | -0.98851500 |
| H  | 3.14255200  | -0.04279100 | 0.60233100  |
| C  | 3.37590600  | -2.03222500 | -2.13178700 |
| H  | 1.74659700  | -2.54447300 | -3.45384200 |
| H  | 4.13098900  | -2.59631500 | -2.67121400 |
| S  | 5.47902800  | -1.38849700 | -0.36613700 |
| O  | 5.40714800  | -2.37114600 | 0.75216700  |
| O  | 6.27376200  | -1.83957400 | -1.54115700 |
| O  | 5.73639700  | 0.01464900  | 0.06796000  |
| C  | -4.15531900 | -0.86153200 | -0.27591700 |
| C  | -4.33337700 | -2.11120000 | -0.90812400 |
| C  | -4.84101000 | -0.64854100 | 0.93944400  |
| C  | -5.12400800 | -3.11406500 | -0.33872700 |
| H  | -3.86981700 | -2.28348200 | -1.87755400 |
| C  | -5.63656700 | -1.64404200 | 1.51691500  |
| H  | -4.77379400 | 0.32623900  | 1.41900700  |
| C  | -5.77421400 | -2.88200600 | 0.87935300  |
| H  | -5.24397200 | -4.06977300 | -0.84576600 |
| H  | -6.15690000 | -1.45352800 | 2.45391200  |
| H  | -6.39798900 | -3.65670300 | 1.32071800  |
| Ag | -2.06753400 | -0.18535100 | -0.19557700 |

Filename: TS\_AgCO2PhPPh3SO3

Sum of electronic and zero-point Energies = -60586.8429

**Figure S45 (cont'd):** Cartesian coordinates and transition state energies (eV) for decarboxylation from  $[(\text{RCO}_2)\text{Ag}(\text{P}^*)]^-$  (R = Me, Et, Ph,  $\text{CH}_2\text{Ph}$ ).

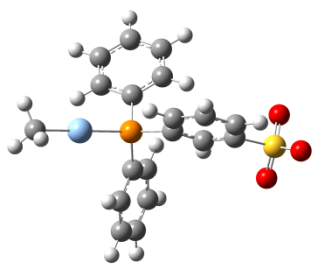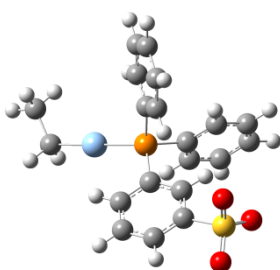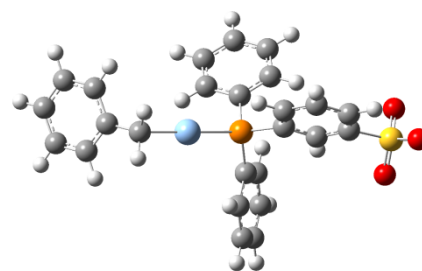

[(Me)Ag(PPh<sub>2</sub>C<sub>6</sub>H<sub>4</sub>SO<sub>3</sub>)<sup>-</sup>]

|    |             |             |             |
|----|-------------|-------------|-------------|
| P  | 0.95349600  | 0.00245800  | -0.01230500 |
| C  | 0.95876700  | 1.38146600  | -1.24384400 |
| C  | 2.15906600  | 2.09080200  | -1.42808000 |
| C  | -0.16400000 | 1.73594500  | -2.00763900 |
| C  | 2.22994600  | 3.14500700  | -2.34035900 |
| H  | 3.04351600  | 1.81218700  | -0.85908400 |
| C  | -0.08883200 | 2.78872200  | -2.92641800 |
| H  | -1.10058300 | 1.19940600  | -1.89115300 |
| C  | 1.10390000  | 3.49641000  | -3.09330300 |
| H  | 3.16557700  | 3.68408500  | -2.46971300 |
| H  | -0.97003500 | 3.05163800  | -3.50606900 |
| H  | 1.15890500  | 4.31361500  | -3.80883100 |
| C  | 0.69745100  | 0.85459000  | 1.60485000  |
| C  | 0.09045400  | 2.11466100  | 1.71920900  |
| C  | 1.11771500  | 0.19323800  | 2.77098200  |
| C  | -0.10534100 | 2.69396200  | 2.97585000  |
| H  | -0.23853600 | 2.64452200  | 0.83011800  |
| C  | 0.91820900  | 0.77159700  | 4.02611900  |
| H  | 1.60288400  | -0.77727200 | 2.69545200  |
| C  | 0.30540800  | 2.02395100  | 4.13108700  |
| H  | -0.59225500 | 3.66308000  | 3.04927400  |
| H  | 1.24245600  | 0.24411500  | 4.91991500  |
| H  | 0.14515400  | 2.47321200  | 5.10819500  |
| C  | -0.59830700 | -0.92251400 | -0.32452800 |
| C  | -1.85666300 | -0.41614500 | 0.03568400  |
| C  | -0.51440100 | -2.15458400 | -0.99787300 |
| C  | -3.02054400 | -1.10737800 | -0.30776400 |
| H  | -1.95524200 | 0.51597300  | 0.58393400  |
| C  | -1.68124500 | -2.85490600 | -1.31394200 |
| H  | 0.45754300  | -2.56303400 | -1.26552100 |
| C  | -2.93344300 | -2.32997300 | -0.97832700 |
| H  | -1.61164900 | -3.81317000 | -1.82456500 |
| H  | -3.85210800 | -2.85680700 | -1.21887600 |
| S  | -4.64644400 | -0.33847400 | 0.03289500  |
| O  | -4.77064500 | 0.66516300  | -1.06539900 |
| O  | -4.89222000 | 0.25969200  | 1.38787900  |
| O  | -5.61297200 | -1.46830300 | -0.05033600 |
| Ag | 3.02843000  | -1.32606400 | -0.07571800 |
| C  | 4.83179700  | -2.43903600 | -0.12083700 |
| H  | 5.53092600  | -2.08620300 | 0.64962800  |
| H  | 4.63585800  | -3.50473000 | 0.05972400  |
| H  | 5.32514300  | -2.34419500 | -1.09778600 |

Filename: AgMePPh3SO3\_4

Sum of electronic and zero-point Energies = -50239.7027

[(Et)Ag(PPh<sub>2</sub>C<sub>6</sub>H<sub>4</sub>SO<sub>3</sub>)<sup>-</sup>]

|    |             |             |             |
|----|-------------|-------------|-------------|
| P  | 0.73915900  | 0.10333900  | 0.01476600  |
| C  | 0.69319000  | 1.35024600  | -1.34934400 |
| C  | 1.85202100  | 2.11360100  | -1.57834800 |
| C  | -0.42632300 | 1.55176000  | -2.17130100 |
| C  | 1.88419100  | 3.07203300  | -2.59268600 |
| H  | 2.73485400  | 1.95264400  | -0.96323500 |
| C  | -0.38961100 | 2.50838500  | -3.19196100 |
| H  | -1.33082400 | 0.97043800  | -2.02125900 |
| C  | 0.76119500  | 3.27131300  | -3.40363600 |
| H  | 2.78787500  | 3.65479900  | -2.75536300 |
| H  | -1.26802600 | 2.65350700  | -3.81563800 |
| H  | 0.78637300  | 4.01348400  | -4.19821700 |
| C  | 0.40354300  | 1.09641700  | 1.53390100  |
| C  | -0.26706900 | 2.32891600  | -1.51172300 |
| C  | 0.82939000  | 0.57549300  | 2.76730100  |
| C  | -0.51914200 | 3.01845800  | 2.70090000  |
| H  | -0.60186400 | 2.75101800  | 0.56874600  |
| C  | 0.57355100  | 1.26363600  | 3.95499000  |
| H  | 1.36313100  | -0.37171700 | 2.79722100  |
| C  | -0.10207600 | 2.48738600  | 3.92409600  |
| H  | -1.05459400 | 3.96394900  | 2.66902000  |
| H  | 0.90297300  | 0.84392200  | 4.90239300  |
| H  | -0.30606400 | 3.02194400  | 4.84869800  |
| C  | -0.75192900 | -0.93611900 | -0.22421100 |
| C  | -2.04426000 | -0.46787600 | 0.05996500  |
| C  | -0.58468100 | -2.22584800 | -0.75972000 |
| C  | -3.15980600 | -1.25828600 | -0.22445500 |
| H  | -2.20689200 | 0.50999700  | 0.50327000  |
| C  | -1.70347400 | -3.02244300 | -1.01648400 |
| H  | 0.41417300  | -2.60335900 | -0.96686000 |
| C  | -2.98983700 | -2.53845100 | -0.75806000 |
| H  | -1.56938800 | -4.02401400 | -1.41988800 |
| H  | -3.87190400 | -3.14100400 | -0.95368800 |
| S  | -4.83398300 | -0.55465300 | 0.00588100  |
| O  | -5.00463200 | 0.29093200  | -1.21259200 |
| O  | -4.73168400 | 0.21978400  | 1.27406800  |
| O  | -5.72851300 | -1.74385700 | 0.06258800  |
| Ag | 2.89102300  | -1.10682100 | 0.11637700  |
| C  | 4.75833200  | -2.13696500 | 0.21997300  |
| H  | 4.93043000  | -2.41093100 | 1.27182200  |
| H  | 4.64283800  | -3.08675600 | -0.32364800 |
| C  | 5.98398800  | -1.37921200 | -0.32212000 |
| H  | 6.91662400  | -1.96758900 | -0.24167100 |
| H  | 5.86519000  | -1.11623700 | -1.38202500 |
| H  | 6.15483300  | -0.43868400 | 0.21934500  |

Filename: AgEtPPh3SO3\_3

Sum of electronic and zero-point Energies = -51308.5457

[(PhCH<sub>2</sub>)Ag(PPh<sub>2</sub>C<sub>6</sub>H<sub>4</sub>SO<sub>3</sub>)<sup>-</sup>]

|    |             |             |             |
|----|-------------|-------------|-------------|
| P  | 0.12278800  | 0.11238400  | -0.01902000 |
| C  | 0.09617800  | 1.01459500  | 1.59228900  |
| C  | -1.10910500 | 1.61918800  | 1.99078600  |
| C  | 1.21701600  | 1.10920900  | 2.43241600  |
| C  | -1.18770300 | 2.32068000  | 3.19559000  |
| H  | -1.99227300 | 1.53502100  | 1.36113200  |
| C  | 1.13377200  | 1.80780300  | 3.64144600  |
| H  | 2.15627000  | 0.64188100  | 2.15259600  |
| C  | -0.06455800 | 2.41612500  | -0.94243000 |
| H  | -2.12761000 | 2.78156900  | 3.48948000  |
| H  | 2.01192700  | 1.87343300  | 4.27872000  |
| H  | -0.12574500 | 2.95679200  | 4.96585500  |
| C  | 0.51029400  | 1.41094200  | -1.26992700 |
| C  | 1.04441600  | 2.66356800  | -0.93425600 |
| C  | 0.26681700  | 1.11365100  | -2.62158800 |
| C  | 1.33908600  | 3.59643500  | -1.93306800 |
| H  | 1.24002600  | 2.91291000  | 0.10426300  |
| C  | 0.56828200  | 2.04327400  | -3.61776600 |
| H  | -0.15576400 | 0.14961100  | -0.89587400 |
| C  | 1.10460300  | 3.28860800  | -3.27501500 |
| H  | 1.76522700  | 4.55819400  | -1.65900500 |
| H  | 0.38426200  | 1.79468300  | -0.60025000 |
| H  | 1.34313700  | 4.01214100  | -4.05063200 |
| C  | 1.60803100  | -0.95829800 | 0.03963300  |
| C  | 2.90194700  | -0.44076700 | -0.12388000 |
| C  | 1.43742100  | -2.32731700 | 0.13189200  |
| C  | 4.01659900  | -1.26890600 | 0.02685600  |
| H  | 3.06530600  | 0.60463600  | -0.36904000 |
| C  | 2.55554400  | -3.15540900 | 0.43661100  |
| H  | 0.43709200  | -2.74024400 | 0.42450300  |
| C  | 3.84407000  | -2.62742700 | 0.30274300  |
| H  | 2.41992800  | -4.21594800 | 0.63824100  |
| H  | 4.72631800  | -3.25328300 | 0.39897500  |
| S  | 5.68943100  | -0.52798900 | -0.03521000 |
| O  | 5.80730700  | 0.12306700  | 1.30289700  |
| O  | 5.61930800  | 0.42947300  | -1.17375100 |
| O  | 6.59841100  | -1.68925300 | -0.24075800 |
| Ag | -2.00093100 | -1.03812700 | -0.46257600 |
| C  | -3.89407100 | -2.00164400 | -0.83034500 |
| H  | -3.92695200 | -2.21548600 | -1.90514500 |
| H  | -3.86290400 | -2.95555200 | -2.9082300  |
| C  | -5.05123400 | -1.17266000 | -0.40425500 |
| C  | -5.67091500 | -0.25331500 | -1.28121600 |
| C  | -5.58846500 | -1.25947500 | 0.90044800  |
| C  | -6.75047100 | 0.53455200  | -0.87915700 |
| H  | -5.28686000 | -0.15783600 | -2.29587900 |
| C  | -6.66778500 | -0.47293700 | 1.30599900  |
| H  | -5.13933200 | -1.95731600 | 1.60574300  |
| C  | -7.26143200 | 0.43538800  | 0.42088800  |
| H  | -7.19818100 | 1.23037700  | -1.58703300 |
| H  | -7.05064800 | -0.57191500 | 2.32058100  |
| H  | -8.10243700 | 1.04890400  | 0.73557700  |

Filename: AgCH2PhPPh3SO3\_2

Sum of electronic and zero-point Energies = -56525.0995

**Figure S46:** Cartesian coordinates and energies (eV) for [(R)Ag(PPh<sub>2</sub>C<sub>6</sub>H<sub>4</sub>SO<sub>3</sub>)<sup>-</sup>], R = Me, Et, Ph and CH<sub>2</sub>Ph.

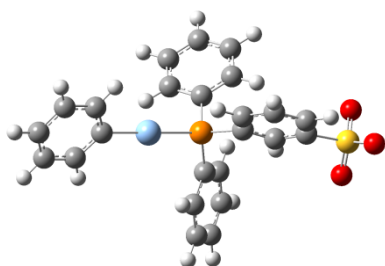

[(Ph)Ag(PPh<sub>2</sub>C<sub>6</sub>H<sub>4</sub>SO<sub>3</sub>)]<sup>-</sup>

|    |             |             |             |
|----|-------------|-------------|-------------|
| P  | 0.05629700  | 0.42839100  | -0.06010000 |
| C  | -0.29189300 | 1.53191000  | -1.50077600 |
| C  | 0.68412500  | 2.48149400  | -1.85181500 |
| C  | -1.46973800 | 1.45377600  | -2.26005900 |
| C  | 0.47874300  | 3.34843400  | -2.92644100 |
| H  | 1.61183000  | 2.53803300  | -1.28632200 |
| C  | -1.67038500 | 2.31976800  | -3.34062000 |
| H  | -2.23561400 | 0.72389100  | -2.01656200 |
| C  | -0.70107300 | 3.26859400  | -3.67458200 |
| H  | 1.24342000  | 4.07718200  | -3.18463700 |
| H  | -2.59021500 | 2.24725200  | -3.91518900 |
| H  | -0.86001100 | 3.93895300  | -4.51603600 |
| C  | -0.43005600 | 1.43416200  | 1.40785100  |
| C  | -1.32617600 | 2.51106600  | 1.33265700  |
| C  | 0.11099400  | 1.08329800  | 2.65608900  |
| C  | -1.68314800 | 3.21486500  | 2.48620500  |
| H  | -1.75403600 | 2.79929600  | 0.37705800  |
| C  | -0.24976300 | 1.78473000  | 3.80794900  |
| H  | 0.81495100  | 0.25714900  | 2.72722700  |
| C  | -1.14832500 | 2.85288500  | 3.72501400  |
| H  | -2.39069400 | 4.03696400  | 2.41489000  |
| H  | 0.17129800  | 1.49660800  | 4.76800700  |
| H  | -1.43343900 | 3.39701500  | 4.62206800  |
| C  | -1.17936500 | -0.91957100 | -0.15957200 |
| C  | -2.53230400 | -0.70829800 | 0.14679100  |
| C  | -0.75971100 | -2.18341700 | -0.61237000 |
| C  | -3.46546900 | -1.73057800 | -0.03805700 |
| H  | -2.88302900 | 0.24570000  | 0.52923400  |
| C  | -1.69361900 | -3.21067900 | -0.76696900 |
| H  | 0.28995500  | -2.36178300 | -0.83491000 |
| C  | -3.04592500 | -2.98410400 | -0.49004500 |
| H  | -1.36392100 | -4.19051100 | -1.10588500 |
| H  | -3.78834300 | -3.76759800 | -0.60962900 |
| S  | -5.24170100 | -1.36626900 | 0.21317200  |
| O  | -5.59419000 | -0.60200200 | -1.01984900 |
| O  | -5.27219200 | -0.55406300 | 1.46112700  |
| O  | -5.88175800 | -2.70657800 | 0.31519800  |
| Ag | 2.40015300  | -0.27287300 | 0.01796000  |
| C  | 4.43614600  | -0.82065600 | 0.07970800  |
| C  | 4.99598400  | -1.73687200 | -0.83852700 |
| C  | 5.32776300  | -0.29127400 | 1.03943400  |
| C  | 6.34862000  | -2.10287800 | -0.80630100 |
| H  | 4.36582200  | -2.18432000 | -1.60635000 |
| C  | 6.68283800  | -0.64700500 | 1.08476500  |
| H  | 4.96362100  | 0.42114700  | 1.77900000  |
| C  | 7.20130100  | -1.55771900 | 0.15881500  |
| H  | 6.73595600  | -2.81438600 | -1.53502700 |
| H  | 7.33312100  | -0.21306300 | 1.84389800  |
| H  | 8.25264600  | -1.83852600 | 0.18913900  |

Filename: AgPhPPh3SO3\_3

Sum of electronic and zero-point Energies = -55455.8813

**Figure S46 (cont'd):** Cartesian coordinates and energies (eV) for [(R)Ag(PPh<sub>2</sub>C<sub>6</sub>H<sub>4</sub>SO<sub>3</sub>)]<sup>-</sup>, R = Me, Et, Ph and CH<sub>2</sub>Ph.

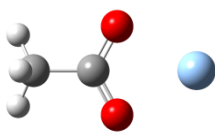

**[Ag(O<sub>2</sub>CMe)]<sup>-</sup>**

|    |             |             |             |
|----|-------------|-------------|-------------|
| O  | -0.91416600 | 1.11737000  | -0.01097000 |
| O  | -0.91424100 | -1.11726200 | -0.01097300 |
| C  | -1.52216900 | 0.00008300  | -0.01516600 |
| C  | -3.04198300 | 0.00001500  | 0.00743500  |
| H  | -3.43350900 | 0.90073900  | -0.47078800 |
| H  | -3.43331200 | -0.89694800 | -0.47804100 |
| H  | -3.37400300 | -0.00449600 | 1.05280000  |
| Ag | 1.11176600  | -0.00001600 | 0.00251000  |

Filename: AgCO2Me\_2

Sum of electronic and zero-point Energies = -10216.8276

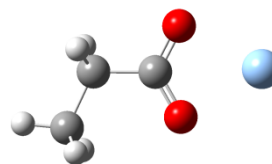

**[Ag(O<sub>2</sub>CEt)]<sup>-</sup>**

|    |             |             |             |
|----|-------------|-------------|-------------|
| O  | -0.34393800 | 1.31365000  | 0.00004100  |
| O  | -0.71488200 | -0.88901800 | -0.00013600 |
| C  | -1.13049900 | 0.31051000  | -0.00005100 |
| C  | -2.63136000 | 0.59493600  | -0.00007800 |
| H  | -2.83252100 | 1.22877100  | 0.87317600  |
| H  | -2.83252600 | 1.22850400  | -0.87352200 |
| Ag | 1.47130700  | -0.09676300 | 0.00001400  |
| C  | -3.52822300 | -0.64369200 | 0.00011700  |
| H  | -4.58407900 | -0.34637800 | 0.00010000  |
| H  | -3.34563500 | -1.26543300 | -0.88222300 |
| H  | -3.34559400 | -1.26518800 | 0.88262200  |

Filename: AgCO2Et

Sum of electronic and zero-point Energies = -11285.8610

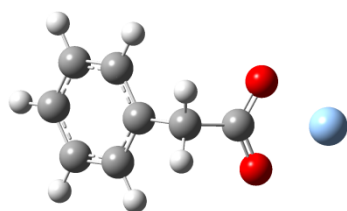

**[Ag(O<sub>2</sub>CCH<sub>2</sub>Ph)]<sup>-</sup>**

|    |             |             |             |
|----|-------------|-------------|-------------|
| O  | 0.90696400  | -0.70609000 | 1.04349400  |
| O  | 0.90273600  | 1.27951300  | 0.01642700  |
| C  | 0.38198000  | 0.42462800  | 0.79738200  |
| C  | -0.95658300 | 0.76385100  | 1.46581800  |
| H  | -0.98192300 | 0.26717400  | 2.44014900  |
| H  | -0.99715400 | 1.84574300  | 1.61853300  |
| Ag | 2.66076400  | -0.18319100 | -0.37569800 |
| C  | -2.13333600 | 0.31248700  | 0.61852300  |
| C  | -2.77688000 | 1.20827400  | -0.24695700 |
| C  | -2.59248800 | -1.01176600 | 0.68168100  |
| C  | -3.85843700 | 0.79311700  | -1.02935200 |
| H  | -2.42601300 | 2.23579100  | -0.30909800 |
| C  | -3.67247800 | -1.42976300 | -0.10001400 |
| H  | -2.09552500 | -1.71721200 | 1.34343900  |
| C  | -4.31055200 | -0.52773100 | -0.95767900 |
| H  | -4.34847400 | 1.50251100  | -1.69189300 |
| H  | -4.01767200 | -2.45894600 | -0.03653400 |
| H  | -5.15408600 | -0.85105400 | -1.56256100 |

Filename: AgCO2CH2Ph

Sum of electronic and zero-point Energies = -16502.0007

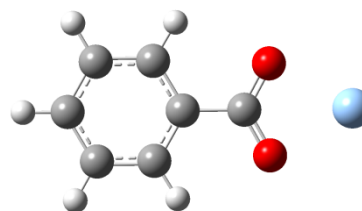

**[Ag(O<sub>2</sub>CPh)]<sup>-</sup>**

|    |             |             |             |
|----|-------------|-------------|-------------|
| O  | -0.50312800 | -1.11656600 | 0.00009900  |
| O  | -0.50241200 | 1.11783700  | 0.00009100  |
| C  | 0.11023700  | 0.00051000  | 0.00006500  |
| Ag | -2.52344500 | -0.00014300 | -0.00002800 |
| C  | 1.61088800  | 0.00014500  | 0.00001400  |
| C  | 2.31589700  | 1.21301700  | 0.00000000  |
| C  | 2.31538900  | -1.21302300 | -0.00000300 |
| C  | 3.71191800  | 1.21121500  | -0.00002500 |
| H  | 1.75801000  | 2.14365500  | 0.00001600  |
| C  | 3.71141300  | -1.21179700 | -0.00002900 |
| H  | 1.75712100  | -2.14343100 | 0.00001700  |
| C  | 4.41170300  | -0.00043500 | -0.00003900 |
| H  | 4.25412600  | 2.15350800  | -0.00003000 |
| H  | 4.25323800  | -2.15431000 | -0.00003600 |
| H  | 5.49906600  | -0.00065900 | -0.00005500 |

Filename: AgCO2Ph

Sum of electronic and zero-point Energies = -15433.0707

**Figure S47:** Cartesian coordinates and energies (eV) for [Ag(O<sub>2</sub>CR)]<sup>-</sup>, R = Me, Et, Ph and CH<sub>2</sub>Ph.

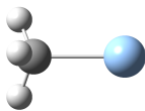

**[Ag(Me)]<sup>-</sup>**

|    |             |             |             |
|----|-------------|-------------|-------------|
| Ag | -0.35745300 | 0.00000000  | 0.00000500  |
| C  | 1.75660300  | 0.00000500  | -0.00001800 |
| H  | 2.08668600  | -0.85912200 | -0.58772000 |
| H  | 2.08679400  | 0.93854200  | -0.45011700 |
| H  | 2.08720900  | -0.07947100 | 1.03772500  |

Filename: AgMe

Sum of electronic and zero-point Energies = -5084.9563

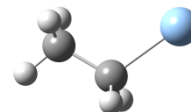

**[Ag(Et)]<sup>-</sup>**

|    |             |             |             |
|----|-------------|-------------|-------------|
| Ag | -0.69859600 | -0.04755000 | 0.00000000  |
| C  | 1.30914600  | 0.68320300  | 0.00000100  |
| H  | 1.35879300  | 1.31683200  | -0.89054300 |
| H  | 1.35882600  | 1.31686000  | 0.89052200  |
| C  | 2.37610800  | -0.40684400 | 0.00000000  |
| H  | 3.38344400  | 0.04369400  | -0.00007900 |
| H  | 2.31075900  | -1.05028600 | 0.88437800  |
| H  | 2.31066300  | -1.05038400 | -0.88429900 |

Filename: AgEt

Sum of electronic and zero-point Energies = -6153.8733

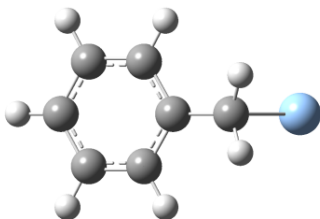

**[Ag(CH<sub>2</sub>Ph)]<sup>-</sup>**

|    |             |             |             |
|----|-------------|-------------|-------------|
| Ag | -1.96541500 | -0.00001400 | -0.23690800 |
| C  | -0.36994800 | 0.00010000  | 1.21810400  |
| H  | -0.58405600 | 0.89749800  | 1.80207900  |
| H  | -0.58404700 | -0.89719500 | 1.80224400  |
| C  | 0.97321100  | 0.00004900  | 0.59894700  |
| C  | 1.64432300  | 1.20643100  | 0.30800100  |
| C  | 1.64426400  | -1.20638700 | 0.30809000  |
| C  | 2.92239000  | 1.20722200  | -0.25042700 |
| H  | 1.15015000  | 2.15193700  | 0.52344600  |
| C  | 2.92233100  | -1.20728100 | -0.25033500 |
| H  | 1.15004800  | -2.15185500 | 0.52360600  |
| C  | 3.57065500  | -0.00005600 | -0.53609100 |
| H  | 3.41640200  | 2.15292400  | -0.46136600 |
| H  | 3.41629700  | -2.15302100 | -0.46120900 |
| H  | 4.56634600  | -0.00009600 | -0.97183100 |

Filename: AgCH2Ph

Sum of electronic and zero-point Energies = -11370.2785

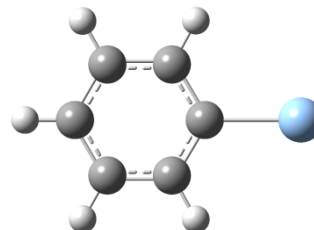

**[Ag(Ph)]<sup>-</sup>**

|    |             |             |             |
|----|-------------|-------------|-------------|
| Ag | 1.66184100  | 0.00000000  | -0.00006200 |
| C  | -0.42987300 | -0.00000600 | 0.00039800  |
| C  | -1.14420400 | 1.20821400  | 0.00022700  |
| C  | -1.14420600 | -1.20821700 | 0.00023200  |
| C  | -2.54576600 | 1.20710800  | -0.00006300 |
| H  | -0.62231100 | 2.16126000  | 0.00035300  |
| C  | -2.54577000 | -1.20710500 | -0.00007500 |
| H  | -0.62232100 | -2.16126500 | 0.00040700  |
| C  | -3.24981900 | 0.00000200  | -0.00023500 |
| H  | -3.08340900 | 2.15319800  | -0.00012900 |
| H  | -3.08341500 | -2.15319200 | -0.00016000 |
| H  | -4.33723200 | 0.00000400  | -0.00044400 |

Filename: AgPh

Sum of electronic and zero-point Energies = -10300.9228

**Figure S48:** Cartesian coordinates and energies (eV) for [Ag(R)]<sup>-</sup>, R = Me, Et, Ph and CH<sub>2</sub>Ph.

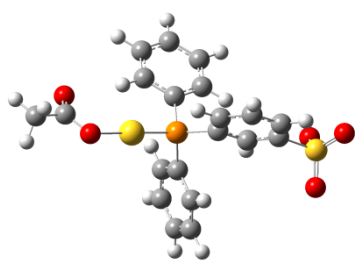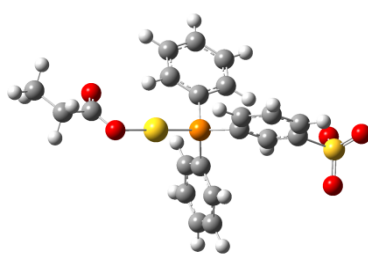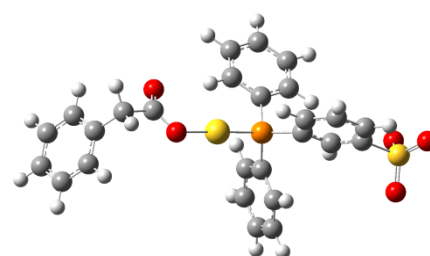

$[(\text{CH}_3\text{CO}_2)\text{Au}(\text{PPh}_2\text{C}_6\text{H}_4\text{SO}_3)]^-$

|    |             |             |             |
|----|-------------|-------------|-------------|
| P  | 0.12073100  | 0.28996800  | 0.02288600  |
| C  | 0.15501100  | 1.57613200  | -1.29668700 |
| C  | 1.39103600  | 1.99950600  | -1.81249700 |
| C  | -1.03174200 | 2.14529000  | -1.79064800 |
| C  | 1.43820500  | 2.98787600  | -2.80119600 |
| H  | 2.31569800  | 1.55267300  | -1.45393300 |
| C  | -0.97785600 | 3.12944800  | -2.77937700 |
| H  | -1.99954400 | 1.82050600  | -1.42064200 |
| C  | 0.25611500  | 3.55406500  | -3.28456200 |
| H  | 2.40119100  | 3.30369000  | -3.19446300 |
| H  | -1.90319700 | 3.35720000  | -3.15634400 |
| H  | 0.29334700  | 4.31821200  | -4.05759100 |
| C  | -0.36026900 | 1.18612600  | 1.55820700  |
| C  | -0.05813900 | 2.54627900  | 1.72195900  |
| C  | -0.95971500 | 0.48412900  | 2.61666000  |
| C  | -0.35690700 | 3.19493700  | 2.92322400  |
| H  | 0.40382400  | 3.10388300  | 0.91250900  |
| C  | -1.26272700 | 1.13721600  | 3.81239400  |
| H  | -1.21277200 | -0.56598200 | 2.50314900  |
| C  | -0.96114500 | 2.49337400  | 3.96951900  |
| H  | -0.12442000 | 4.25119700  | 3.03464300  |
| H  | -1.74830800 | 0.58692200  | 4.61380100  |
| H  | -1.20444300 | 3.00172100  | 4.89925600  |
| C  | -1.26552900 | -0.83505700 | -0.35995400 |
| C  | -2.59554100 | -0.45495700 | -0.12306100 |
| C  | -0.99385700 | -2.07738000 | -0.96080200 |
| C  | -3.64646000 | -1.29402100 | -0.49726700 |
| H  | -2.83939300 | 0.49134200  | 0.35022400  |
| C  | -2.05035700 | -2.91256400 | -1.32970100 |
| H  | 0.03448700  | -2.38313800 | -1.13584200 |
| C  | -3.37487200 | -2.52248100 | -1.10320500 |
| H  | -1.83787200 | -3.87213400 | -1.79600300 |
| H  | -4.20927100 | -3.15308300 | -1.39553000 |
| S  | -5.36425600 | -0.76543300 | -0.14870600 |
| O  | -5.35649700 | 0.68121000  | -0.51088600 |
| O  | -5.52023000 | -1.02922400 | 1.30977100  |
| O  | -6.19561400 | -1.62978200 | -1.03061200 |
| O  | 4.95376700  | 0.05864200  | -0.79254200 |
| O  | 4.04627900  | -1.61394700 | 0.43095600  |
| C  | 5.03940900  | -0.99257900 | -0.14918200 |
| C  | 6.37870200  | -1.70169900 | 0.03883400  |
| H  | 7.17714100  | -1.14366700 | -0.45598500 |
| H  | 6.60257400  | -1.79990700 | 1.10740600  |
| H  | 6.32505000  | -2.71548500 | -0.37481200 |
| Au | 2.17140800  | -0.70953900 | 0.22388200  |

Filename: AuCO2MePPh3SO3\_3  
 Sum of electronic and zero-point Energies = -55066.7188

$[(\text{CH}_3\text{CH}_2\text{CO}_2)\text{Au}(\text{PPh}_2\text{C}_6\text{H}_4\text{SO}_3)]^-$

|    |             |             |             |
|----|-------------|-------------|-------------|
| P  | -0.09639100 | 0.31538800  | 0.02918300  |
| C  | -0.07341800 | 1.55584000  | -1.33368800 |
| C  | 1.15983400  | 1.99654100  | -1.84156800 |
| C  | -1.26598800 | 2.07346300  | -1.86858900 |
| C  | 1.19823900  | 2.95150800  | -2.86289000 |
| H  | 2.08950700  | 1.58852700  | -1.45116200 |
| C  | -1.22080000 | 3.02444400  | -2.88973900 |
| H  | -2.23121200 | 1.73390300  | -1.50517000 |
| C  | 0.01016700  | 3.46682300  | -3.38687500 |
| H  | 2.15930100  | 3.28113500  | -3.24948800 |
| H  | -2.15041400 | 3.41235300  | -3.29799300 |
| H  | 0.04073200  | 4.20491800  | -4.18509500 |
| C  | -0.62299700 | 1.25138100  | 1.52529300  |
| C  | -0.36613700 | 2.62546200  | 1.64312900  |
| C  | -1.21325200 | 0.56883000  | 2.60152000  |
| C  | -0.70025300 | 3.30672300  | 2.81677500  |
| H  | 0.08777900  | 3.16836200  | 0.81927600  |
| C  | -1.55154100 | 1.25410900  | 3.76939000  |
| H  | -1.43162800 | -0.49223100 | 2.52290900  |
| C  | -1.29491900 | 2.62401800  | 3.88081200  |
| H  | -0.50285700 | 4.37323100  | 2.89254300  |
| H  | -2.02939800 | 0.71759600  | 4.58466600  |
| H  | -1.56572800 | 3.15720000  | 4.78877200  |
| C  | -1.44915400 | -0.85588200 | -0.33427800 |
| C  | -2.79125500 | -0.50058100 | -0.12941300 |
| C  | -1.13879300 | -2.11070900 | -0.88868400 |
| C  | -3.81607100 | -1.37690900 | -0.49047100 |
| H  | -3.06460200 | 0.45485100  | 0.30805100  |
| C  | -2.16932800 | -2.98330200 | -1.24410600 |
| H  | -0.10090700 | -2.39700600 | -1.03848600 |
| C  | -3.50608600 | -2.61805000 | -1.05031500 |
| H  | -1.92697400 | -3.95258700 | -1.67435100 |
| H  | -4.32076500 | -3.27804700 | -1.33321600 |
| S  | -5.55117500 | -0.87779800 | -0.18707700 |
| O  | -5.57236500 | 0.55365000  | -0.60489700 |
| O  | -5.72313000 | -1.08912800 | 1.27809900  |
| O  | -6.34797700 | -1.79540500 | -1.04680700 |
| O  | 4.75875900  | 0.17166800  | -0.70177100 |
| O  | 3.86516400  | -1.47971800 | 0.55907700  |
| C  | 4.85545100  | -0.85662900 | -0.02428700 |
| C  | 6.20675000  | -1.54105200 | 0.21401700  |
| H  | 6.35061500  | -1.61600600 | 1.30029200  |
| H  | 6.11767000  | -2.57662400 | -0.14107200 |
| Au | 1.97421200  | -0.62663800 | 0.29425500  |
| C  | 7.39216100  | -0.83693700 | -0.44735000 |
| H  | 8.32652300  | -1.37541100 | -0.24032700 |
| H  | 7.25946900  | -0.77847900 | -1.53297600 |
| H  | 7.49552900  | 0.18959400  | -0.07955500 |

Filename: AuCO2EtPPh3SO3\_2  
 Sum of electronic and zero-point Energies = -56135.7566

$[(\text{PhCH}_2\text{CO}_2)\text{Au}(\text{PPh}_2\text{C}_6\text{H}_4\text{SO}_3)]^-$

|    |             |             |             |
|----|-------------|-------------|-------------|
| P  | -0.89370800 | 0.33504500  | 0.04297700  |
| C  | -1.06247400 | 2.06477600  | -0.56892500 |
| C  | 0.08207800  | 2.76240000  | -0.98806000 |
| C  | -2.31583900 | 2.69963000  | -0.61716100 |
| C  | -0.02517500 | 4.08281400  | -1.43712000 |
| H  | 1.05413000  | 2.27454800  | -0.97699500 |
| C  | -2.41646000 | 4.01681300  | -1.06863700 |
| H  | -3.21713500 | 2.17316400  | -0.31756000 |
| C  | -1.27213900 | 4.71132100  | -1.47650900 |
| H  | 0.86788100  | 4.61041400  | -1.76240000 |
| H  | -3.39218600 | 4.49416300  | -1.10583500 |
| H  | -1.35557900 | 5.73608000  | -1.83108800 |
| C  | -1.17691700 | 0.43274300  | 1.85982900  |
| C  | -0.87923300 | 1.60402600  | 2.57233100  |
| C  | -1.61393600 | -0.70398000 | 2.55946500  |
| C  | -1.02267000 | 1.63908900  | 1.63919700  |
| H  | -0.54171900 | 2.49228300  | 2.04644400  |
| C  | -1.76262300 | -0.66257100 | 3.94661500  |
| H  | -1.86201300 | -1.61530600 | 2.02319800  |
| C  | -1.46613300 | 0.50782000  | 4.65155600  |
| H  | -0.79522400 | 2.55509400  | 1.450167900 |
| H  | -2.12460900 | -1.54233100 | 4.47176600  |
| H  | -1.58865600 | 0.53954000  | 5.73134500  |
| C  | -2.29724800 | -0.61196700 | -0.63941800 |
| C  | -3.58705600 | -0.48263800 | -0.10262300 |
| C  | -2.09059900 | -1.43134000 | -1.76411300 |
| C  | -4.66565300 | -1.14637800 | -0.69013500 |
| H  | -3.77734600 | 0.13086900  | 0.77275000  |
| C  | -3.17362300 | -2.09481400 | -2.34370100 |
| H  | -1.09190400 | -1.54542800 | -2.17794800 |
| C  | -4.46033400 | -1.95122300 | -1.81222000 |
| H  | -3.01199800 | -2.72690800 | -3.21414400 |
| H  | -5.31679000 | -2.44946100 | -2.25672500 |
| S  | -6.32720900 | -0.95401400 | 0.05404200  |
| O  | -6.41789000 | 0.51302700  | 0.30642000  |
| O  | -6.25255000 | -1.78262300 | 1.29048700  |
| O  | -7.25459900 | -1.47098700 | -0.98925500 |
| O  | 3.76288900  | 0.75606200  | -1.54150600 |
| O  | 3.08031400  | -1.28903800 | -0.85007200 |
| C  | 3.95453300  | -0.44246000 | -1.31579600 |
| C  | 5.34109100  | -1.06774500 | -1.57242200 |
| H  | 5.23062500  | -2.14801800 | -1.70152200 |
| H  | 5.72180400  | -0.63895400 | -2.50594800 |
| Au | 1.18102700  | -0.50218000 | -0.44643500 |
| C  | 6.30822500  | -0.77534000 | -0.44167000 |
| C  | 6.93140500  | 0.47861400  | -0.33756500 |
| C  | 6.58710900  | -1.74261400 | 0.53488800  |
| C  | 7.81065500  | 0.75568500  | 0.71206900  |
| H  | 6.70770300  | 1.24253200  | -1.07782200 |
| C  | 7.46685700  | -1.46899400 | 1.58695100  |
| H  | 6.10312500  | -2.71479600 | 0.47286800  |
| C  | 8.08395000  | -0.21808700 | 1.67891400  |
| H  | 8.28137200  | 1.73435100  | 0.77644800  |
| H  | 7.66757300  | -2.23310900 | 2.33476200  |
| H  | 8.76871800  | -0.00295900 | 2.49609100  |

Filename: AuCO2CH2PhPPh3SO3\_3  
 Sum of electronic and zero-point Energies = -61351.9161

**Figure S49:** Cartesian coordinates and energies (eV) for  $[(\text{RCO}_2)\text{Au}(\text{PPh}_2\text{C}_6\text{H}_4\text{SO}_3)]^-$ , R = Me, Et, Ph and  $\text{CH}_2\text{Ph}$ .

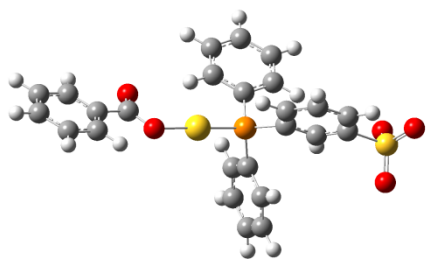

$[(\text{PhCO}_2)\text{Au}(\text{PPh}_2\text{C}_6\text{H}_4\text{SO}_3)]^-$

|    |             |             |             |
|----|-------------|-------------|-------------|
| P  | -0.75869000 | 0.42235400  | 0.05693200  |
| C  | -0.94139000 | 1.86616200  | -1.07322000 |
| C  | 0.20575400  | 2.55732100  | -1.49679700 |
| C  | -2.20710400 | 2.29330100  | -1.51078300 |
| C  | 0.08604200  | 3.66832300  | -2.33793500 |
| H  | 1.19221700  | 2.22441100  | -1.18183900 |
| C  | -2.31947700 | 3.40139500  | -2.35264500 |
| H  | -3.10656300 | 1.76338700  | -1.21203200 |
| C  | -1.17472200 | 4.09199500  | -2.76551200 |
| H  | 0.98193000  | 4.19211100  | -2.66163300 |
| H  | -3.30367300 | 3.71764900  | -2.68821900 |
| H  | -1.26662900 | 4.95237500  | -3.42437900 |
| C  | -1.32735100 | 1.02213700  | 1.70295200  |
| C  | -1.19968800 | 2.37386900  | 2.05634600  |
| C  | -1.81288500 | 0.10740300  | 2.65143500  |
| C  | -1.55717500 | 2.80400900  | 3.33693700  |
| H  | -0.82721600 | 3.09423700  | 1.33389000  |
| C  | -2.17551700 | 0.54241900  | 3.92724200  |
| H  | -1.93155500 | -0.94032300 | 2.39141000  |
| C  | -2.04706600 | 1.89066500  | 4.27398600  |
| H  | -1.45992400 | 3.85539500  | 3.59619200  |
| H  | -2.57228600 | -0.17264700 | 4.64283100  |
| H  | -2.33612400 | 2.22818900  | 5.26620600  |
| C  | -1.97127000 | -0.83336300 | -0.47516900 |
| C  | -3.33682600 | -0.69063100 | -0.18607600 |
| C  | -1.53383400 | -1.92624600 | -1.24550500 |
| C  | -4.26184100 | -1.61518300 | -0.67459900 |
| H  | -3.70521700 | 0.13399100  | 0.41671500  |
| C  | -2.46451000 | -2.84858000 | -1.72735700 |
| H  | -0.47591700 | -2.04946500 | -1.46298800 |
| C  | -3.82699900 | -2.69348800 | -1.44752100 |
| H  | -2.12415900 | -3.69210700 | -2.32396200 |
| H  | -4.56687000 | -3.39372300 | -1.82381600 |
| S  | -6.03090700 | -1.39066000 | -0.26020400 |
| O  | -6.25319900 | 0.06459300  | -0.49887100 |
| O  | -6.10600000 | -1.79261500 | 1.17285000  |
| O  | -6.74252300 | -2.29789800 | -1.20148900 |
| O  | 4.05917100  | 1.05795200  | -0.64459300 |
| O  | 3.41015700  | -0.92843700 | 0.21914800  |
| C  | 4.29960600  | -0.07327200 | -0.20454600 |
| Au | 1.41810400  | -0.28102700 | 0.12238400  |
| C  | 5.72596000  | -0.57280000 | -0.12253000 |
| C  | 6.76904200  | 0.26543100  | -0.54120300 |
| C  | 6.02780100  | -1.85431000 | 0.36070600  |
| C  | 8.09465300  | -0.16943000 | -0.47841300 |
| H  | 6.51730500  | 1.25407700  | -0.91256400 |
| C  | 7.35402100  | -2.29044000 | 0.42301600  |
| H  | 5.21406300  | -2.49576400 | 0.68241100  |
| C  | 8.39068700  | -1.44947700 | 0.00397300  |
| H  | 8.89702900  | 0.48843000  | -0.80540700 |
| H  | 7.57892500  | -3.28643000 | 0.79828500  |
| H  | 9.42302200  | -1.78945200 | 0.05282900  |

Filename: AuCO2PhPPh3SO3\_3

Sum of electronic and zero-point Energies = -60282.9972

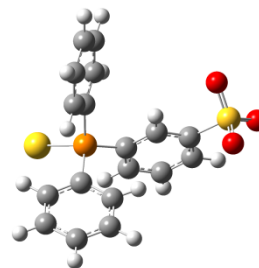

$[\text{Au}(\text{PPh}_2\text{C}_6\text{H}_4\text{SO}_3)]^-$

|    |             |             |             |
|----|-------------|-------------|-------------|
| P  | -0.72440600 | -0.00714900 | 0.08841900  |
| C  | -1.13946200 | -1.19271300 | 1.41085700  |
| C  | -2.46571500 | -1.37235800 | 1.83697000  |
| C  | -0.09780400 | -1.90307300 | 2.03368600  |
| C  | -2.74781200 | -2.24739400 | 2.88670900  |
| H  | -3.27625200 | -0.83878400 | 1.34629000  |
| C  | -0.39060100 | -2.77501900 | 3.08503700  |
| H  | 0.93157100  | -1.78026000 | 1.71009600  |
| C  | -1.71032400 | -2.94836500 | 3.51109900  |
| H  | -3.77540400 | -2.38615700 | 3.21104100  |
| H  | 0.41811300  | -3.31900700 | 3.56439500  |
| H  | -1.93208200 | -3.63326800 | 4.32497300  |
| C  | -0.47647500 | 1.63553300  | 0.82122900  |
| C  | -0.85157600 | 1.90037500  | 2.14899000  |
| C  | 0.09845800  | 2.65246700  | 0.03596000  |
| C  | -0.63964400 | 3.17094300  | 2.68764800  |
| H  | -1.28674200 | 1.12032800  | 2.76557400  |
| C  | 0.31136100  | 3.91482000  | 0.58529100  |
| H  | 0.40542100  | 2.45401400  | -0.98698800 |
| C  | -0.05803900 | 4.17560700  | 1.90978200  |
| H  | -0.91603100 | 3.36872400  | 3.71937700  |
| H  | 0.78128700  | 4.68816200  | -0.01485700 |
| H  | 0.11811800  | 5.15889600  | 2.33678300  |
| C  | 0.78257300  | -0.52511600 | -0.74665700 |
| C  | 2.01342500  | -0.07568300 | -0.24137000 |
| C  | 0.73992400  | -1.45831000 | -1.80233100 |
| C  | 3.20195600  | -0.57695200 | -0.77352400 |
| H  | 2.07675100  | 0.65114200  | 0.56231000  |
| C  | 1.93598100  | -1.93190800 | -2.33723500 |
| H  | -0.21232400 | -1.79938900 | -2.20130300 |
| C  | 3.16561900  | -1.49695800 | -1.82173200 |
| H  | 1.91201300  | -2.63925300 | -3.16223500 |
| H  | 4.10696500  | -1.85314800 | -2.23019000 |
| S  | 4.77392200  | -0.03801200 | 0.00442100  |
| O  | 4.75224300  | -0.80229900 | 1.28215700  |
| O  | 4.57811800  | 1.42797900  | 0.16141600  |
| O  | 5.81145500  | -0.45085100 | -0.97112900 |
| Au | -2.48143900 | 0.08163800  | -1.41144700 |

Filename: AuPPh3SO3

Sum of electronic and zero-point Energies = -48845.2930

**Figure S49 (cont'd):** Cartesian coordinates and energies (eV) for  $[(\text{RCO}_2)\text{Au}(\text{PPh}_2\text{C}_6\text{H}_4\text{SO}_3)]^-$ , R = Me, Et, Ph and  $\text{CH}_2\text{Ph}$ , and for  $[\text{Au}(\text{PPh}_2\text{C}_6\text{H}_4\text{SO}_3)]^-$ .

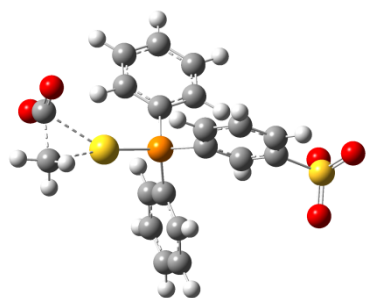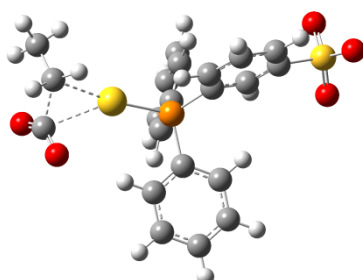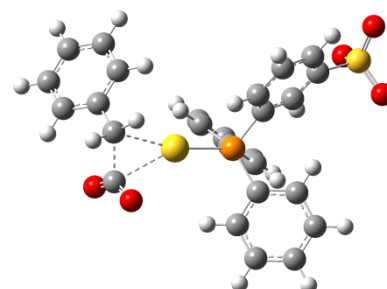

TS [(CH<sub>3</sub>CO<sub>2</sub>)Au(PPh<sub>2</sub>C<sub>6</sub>H<sub>4</sub>SO<sub>3</sub>)]<sup>-</sup> →  
 [(CH<sub>3</sub>)Au(PPh<sub>2</sub>C<sub>6</sub>H<sub>4</sub>SO<sub>3</sub>)]<sup>-</sup>  
 (-351 cm<sup>-1</sup>)

|    |             |             |             |
|----|-------------|-------------|-------------|
| O  | -4.85596700 | -0.00972900 | 0.42291000  |
| C  | -4.54050500 | -1.20533700 | 0.36853100  |
| O  | -4.54046000 | -2.17248100 | 1.12203400  |
| C  | -4.15371900 | -1.73027600 | -1.30976600 |
| H  | -3.66261100 | -2.70373300 | -1.40513000 |
| H  | -5.22437000 | -1.90678700 | -1.46208400 |
| H  | -3.90082500 | -1.04387900 | -2.13786300 |
| P  | -0.19152800 | 0.32448900  | 0.00696900  |
| Au | -2.21195400 | -0.66179000 | -0.47534700 |
| C  | 0.32430100  | 1.46897800  | -1.33662300 |
| C  | 0.96514300  | 0.96022000  | -2.47840100 |
| C  | 0.01599300  | 2.83611700  | -1.27232100 |
| C  | 1.30361300  | 1.81097900  | -3.53154300 |
| H  | 1.22466400  | -0.09275100 | -2.53813600 |
| C  | 0.35051700  | 3.68265800  | -2.33267300 |
| H  | -0.47745000 | 3.24416400  | -0.39520100 |
| C  | 0.99598800  | 3.17325700  | -3.46216500 |
| H  | 1.82229100  | 1.40907700  | -4.39761800 |
| H  | 0.11358800  | 4.74169600  | -2.26838000 |
| H  | 1.26722200  | 3.83514500  | -4.28078200 |
| C  | -0.32368900 | 1.35843900  | 1.52207800  |
| C  | 0.83223400  | 1.83844600  | 2.16273500  |
| C  | -1.58873000 | 1.67557600  | 2.04236500  |
| C  | 0.71804100  | 2.63498600  | 3.30319500  |
| H  | 1.82008000  | 1.58781500  | 1.78738300  |
| C  | -1.69495500 | 2.47512300  | 3.18495000  |
| H  | -2.49097200 | 1.29352700  | 1.57038100  |
| C  | -0.54448700 | 2.95582700  | 3.81465800  |
| H  | 1.61822200  | 2.99636700  | 3.79334800  |
| H  | -2.67936200 | 2.70830000  | 3.58209700  |
| H  | -0.62859900 | 3.57170400  | 4.70696400  |
| C  | 1.18358800  | -0.84527800 | 0.25357200  |
| C  | 0.90485400  | -2.16003900 | 0.66923200  |
| C  | 2.51484500  | -0.43002500 | 0.09819600  |
| C  | 1.95903500  | -3.03589300 | 0.93433400  |
| H  | -0.12434600 | -2.48993500 | 0.78656500  |
| C  | 3.56252100  | -1.31369200 | 0.36274700  |
| H  | 2.76265000  | 0.57600700  | -0.22635600 |
| C  | 3.28562100  | -2.61597300 | 0.78326400  |
| H  | 1.74291500  | -4.05108300 | 1.25924700  |
| H  | 4.11770400  | -3.28136900 | 0.99360000  |
| S  | 5.28182000  | -0.73765600 | 0.10864900  |
| O  | 5.26914000  | 0.63675900  | 0.68646400  |
| O  | 5.44125400  | -0.77602600 | -1.37262800 |
| O  | 6.10929200  | -1.72630200 | 0.85162700  |

Filename: TS\_AuCO2MePPh3SO3\_3  
 Sum of electronic and zero-point Energies = -55064.8026

TS [(CH<sub>3</sub>CH<sub>2</sub>CO<sub>2</sub>)Au(PPh<sub>2</sub>C<sub>6</sub>H<sub>4</sub>SO<sub>3</sub>)]<sup>-</sup> →  
 [(CH<sub>3</sub>CH<sub>2</sub>)Au(PPh<sub>2</sub>C<sub>6</sub>H<sub>4</sub>SO<sub>3</sub>)]<sup>-</sup>  
 (-372 cm<sup>-1</sup>)

|    |             |             |             |
|----|-------------|-------------|-------------|
| O  | -4.43795500 | 0.46775400  | -1.31366700 |
| C  | -4.60174200 | -0.21161100 | -0.29261600 |
| O  | -5.15017400 | -0.09258100 | 0.79215300  |
| C  | -4.08008900 | -1.97932000 | -0.55118700 |
| H  | -4.92726900 | -2.05343500 | -1.24233600 |
| H  | -3.26039200 | -2.33477600 | -0.12850600 |
| P  | -0.05067100 | 0.32613700  | 0.03834800  |
| C  | 0.30086300  | 0.56657500  | 1.82629800  |
| C  | -0.08886800 | 1.74894300  | 2.47363600  |
| C  | 0.88446000  | -0.46863100 | 2.57459500  |
| C  | 0.11018900  | 1.89559800  | 3.84852300  |
| H  | -0.54349700 | 2.55726700  | 1.90843400  |
| C  | 1.08737100  | -0.31441600 | 3.94693300  |
| H  | 1.20315800  | -1.38558900 | 2.08787200  |
| C  | 0.70013600  | 0.86651000  | 4.58702900  |
| H  | -0.19164800 | 2.81784800  | 4.33844900  |
| H  | 1.56166100  | -1.11371700 | 4.50979500  |
| H  | 0.86405600  | 0.98611900  | 5.65503200  |
| C  | -0.03218200 | 2.00964500  | -0.70536200 |
| C  | 1.17222100  | 2.72453200  | -0.83125200 |
| C  | -1.23243300 | 2.58907400  | -1.14760000 |
| C  | 1.16935900  | 4.00625000  | -1.38341300 |
| H  | 2.11414900  | 2.28768700  | -0.51328900 |
| C  | -1.22729600 | 3.87506400  | -1.69823300 |
| H  | -2.16960000 | 2.04188600  | -1.07668300 |
| C  | -0.02979200 | 4.58419700  | -1.81566000 |
| H  | 2.10714300  | 4.54696900  | -1.48020200 |
| H  | -2.16245500 | 4.31146700  | -2.03928500 |
| H  | -0.02700200 | 5.58180700  | -2.24861400 |
| C  | 1.36376400  | -0.59345800 | -0.65583700 |
| C  | 1.14644900  | -1.50223500 | -1.70691700 |
| C  | 2.67036600  | -0.35556200 | -0.20246600 |
| C  | 2.23359800  | -2.14896500 | -2.29765100 |
| H  | 0.13627500  | -1.69675400 | -2.05819800 |
| C  | 3.75211600  | -1.00659300 | -0.79780100 |
| H  | 2.87323100  | 0.33298800  | 0.61207100  |
| C  | 3.53510600  | -1.90164200 | -1.84735100 |
| H  | 2.06334600  | -2.84906700 | -3.11256500 |
| H  | 4.39368300  | -2.38697900 | -2.30190600 |
| S  | 5.43502700  | -0.69133800 | -0.14874700 |
| O  | 5.48416600  | -1.51460700 | 1.09236400  |
| O  | 6.33563800  | -1.15283200 | -1.23984400 |
| O  | 5.43717300  | 0.77992000  | 0.09210800  |
| C  | -4.26736500 | -2.88587900 | 0.66383800  |
| H  | -4.68827900 | -3.86125600 | 0.37901400  |
| H  | -3.32419200 | -3.07334600 | 1.18991100  |
| H  | -4.95198800 | -2.40649800 | 1.37102300  |
| Au | -2.10150500 | -0.67117600 | -0.28183800 |

Filename: TS\_AuCO2EtPPh3SO3\_2  
 Sum of electronic and zero-point Energies = -56133.7615

TS [(PhCH<sub>2</sub>CO<sub>2</sub>)Au(PPh<sub>2</sub>C<sub>6</sub>H<sub>4</sub>SO<sub>3</sub>)]<sup>-</sup> →  
 [(PhCH<sub>2</sub>)Au(PPh<sub>2</sub>C<sub>6</sub>H<sub>4</sub>SO<sub>3</sub>)]<sup>-</sup>  
 (-337 cm<sup>-1</sup>)

|    |             |             |             |
|----|-------------|-------------|-------------|
| O  | -3.64721200 | 2.36200100  | -1.14907000 |
| C  | -4.03384900 | 1.42309900  | -0.44174800 |
| O  | -4.61251700 | 1.26579800  | 0.62100700  |
| C  | -3.88577400 | -0.18142400 | -1.37782000 |
| H  | -4.75691800 | 0.15806800  | -1.94883600 |
| H  | -3.12636400 | -0.30381500 | -2.17451200 |
| P  | 0.50792100  | 0.66057200  | 0.14832800  |
| C  | 0.65797100  | 0.13644600  | 1.90127000  |
| C  | 1.59853800  | 0.71689600  | 2.76570100  |
| C  | -0.16559700 | -0.89930200 | 2.37206400  |
| C  | 1.72178600  | 0.25657200  | 4.07896300  |
| H  | 2.23845700  | 1.52303300  | 2.42005800  |
| C  | -0.03843500 | -1.35566400 | 3.68467000  |
| H  | -0.91066700 | -1.34400300 | 1.71746100  |
| C  | 0.90659300  | -0.78017600 | 4.53928800  |
| H  | 2.46289700  | 0.70415400  | 4.73573000  |
| H  | -0.68099600 | -2.15783900 | 4.03762300  |
| H  | 1.00745100  | -1.13911900 | 5.56040200  |
| C  | 1.12822100  | 2.39020800  | 0.07373000  |
| C  | 2.48117900  | 2.67538400  | -0.17316700 |
| C  | 0.22381400  | 3.44566500  | 0.28091200  |
| C  | 2.92280700  | 4.00159700  | -0.19509400 |
| H  | 3.19254200  | 1.87510100  | -0.35507500 |
| C  | 0.67210600  | 4.76779500  | 0.25954900  |
| H  | -0.83167000 | 3.23896500  | 0.43955600  |
| C  | 2.02205000  | 5.04754700  | 0.02370300  |
| H  | 3.97214900  | 4.20926200  | -0.38719700 |
| H  | -0.03786600 | 5.57602200  | 0.41445900  |
| H  | 2.36860800  | 6.07800000  | 0.00808900  |
| C  | 1.67697900  | -0.35292500 | -0.81816600 |
| C  | 1.39357600  | -0.63704600 | -2.16651800 |
| C  | 2.89244000  | -0.77098100 | -0.25768400 |
| C  | 2.33167500  | -1.32389200 | -2.93838900 |
| H  | 0.44801800  | -0.32498200 | -2.60328300 |
| C  | 3.83829100  | -1.43139000 | -1.04584700 |
| H  | 3.12679200  | -0.59380500 | 0.78763800  |
| C  | 3.55664300  | -1.71302500 | -2.38371000 |
| H  | 2.10719600  | -1.55350400 | -3.97768200 |
| H  | 4.30258100  | -2.24117100 | -2.97018800 |
| S  | 5.47525900  | -1.81468600 | -0.32060300 |
| O  | 5.15109000  | -2.37707100 | 1.01901700  |
| O  | 6.08580800  | -2.77332200 | -1.28085500 |
| O  | 6.12757000  | -0.47314300 | -0.27756800 |
| C  | -4.16285800 | -1.46971200 | -0.66510800 |
| C  | -5.33529900 | -1.64074900 | 0.09310400  |
| C  | -3.26823900 | -2.55401700 | -0.74349000 |
| C  | -5.97979000 | -2.84699400 | 0.74725400  |
| H  | -6.02828000 | -0.81091600 | 0.18655400  |
| C  | -3.52889500 | -3.76116000 | -0.09061400 |
| H  | -2.35489000 | -2.45192300 | -1.32720500 |
| C  | -4.69815300 | -3.91444500 | 0.66143200  |
| H  | -6.51016400 | -2.95069500 | 1.33121500  |
| H  | -2.81838200 | -4.58081000 | -0.17229100 |
| H  | -4.90410400 | -4.85188400 | 1.17289400  |
| Au | -1.67322500 | 0.52739600  | -0.56391600 |

Filename: TS\_AuCO2CH2PhPPh3SO3\_2  
 Sum of electronic and zero-point Energies = -61350.0157

**Figure S50:** Cartesian coordinates and transition state energies (eV) for decarboxylation from [(RCO<sub>2</sub>)Au(P\*)]<sup>-</sup> (R = Me, Et, Ph, CH<sub>2</sub>Ph).



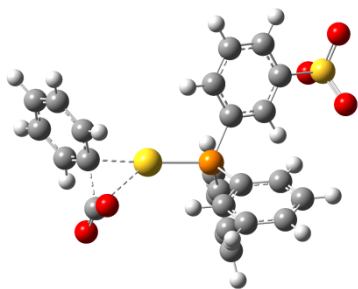

TS  $[(\text{PhCO}_2)\text{Au}(\text{PPh}_2\text{C}_6\text{H}_4\text{SO}_3)]^- \rightarrow [(\text{Ph})\text{Au}(\text{PPh}_2\text{C}_6\text{H}_4\text{SO}_3)]^-$   
 (-267  $\text{cm}^{-1}$ )

|    |             |             |             |
|----|-------------|-------------|-------------|
| O  | -4.41587800 | 1.29716500  | -1.30378300 |
| C  | -4.38802500 | 0.96555600  | -0.13101600 |
| O  | -4.62800300 | 1.38308000  | 0.98592800  |
| P  | 0.39641100  | 0.55672200  | 0.00410700  |
| C  | 0.91703800  | 1.17604200  | 1.65642200  |
| C  | 0.78459000  | 2.53423400  | 1.98317400  |
| C  | 1.36588100  | 0.27411700  | 2.63496500  |
| C  | 1.10428700  | 2.98372600  | 3.26672400  |
| H  | 0.43723100  | 3.24400900  | 1.23807900  |
| C  | 1.69042700  | 0.72894900  | 3.91420900  |
| H  | 1.48656800  | -0.77851800 | 2.39653200  |
| C  | 1.55949200  | 2.08358100  | 4.23370100  |
| H  | 1.00258000  | 4.03932800  | 3.50589000  |
| H  | 2.05945000  | 0.02383500  | 4.65409900  |
| H  | 1.81834800  | 2.43627700  | 5.22893500  |
| C  | 0.65286800  | 1.96882900  | -1.15104200 |
| C  | 1.94612700  | 2.37799000  | -1.52113300 |
| C  | -0.46063400 | 2.65274100  | -1.66456400 |
| C  | 2.11694800  | 3.46140300  | -2.38465000 |
| H  | 2.82200700  | 1.85331400  | -1.15173100 |
| C  | -0.28320700 | 3.73899500  | -2.52756400 |
| H  | -1.46705400 | 2.33581300  | -1.40247600 |
| C  | 1.00402100  | 4.14478400  | -2.88739600 |
| H  | 3.12190900  | 3.76432800  | -2.66669300 |
| H  | -1.15468900 | 4.25711600  | -2.91933800 |
| H  | 1.14187600  | 4.98608500  | -3.56257900 |
| C  | 1.59094000  | -0.74298900 | -0.46023800 |
| C  | 1.14646500  | -1.84228500 | -1.21683800 |
| C  | 2.95053700  | -0.63204200 | -0.13025800 |
| C  | 2.06434900  | -2.80319800 | -1.64568700 |
| H  | 0.09293100  | -1.94159900 | -1.46579800 |
| C  | 3.86223800  | -1.59592800 | -0.56375300 |
| H  | 3.32524400  | 0.19709300  | 0.46217700  |
| C  | 3.42049600  | -2.68071400 | -1.32428700 |
| H  | 1.71849100  | -3.65114400 | -2.23276700 |
| H  | 4.15050100  | -3.41126100 | -1.66006400 |
| S  | 5.62133900  | -1.42405200 | -0.08585400 |
| O  | 5.64352400  | -1.89769200 | 1.32690600  |
| O  | 6.34476400  | -2.29911300 | -1.04825600 |
| O  | 5.87704700  | 0.03614300  | -0.24603100 |
| C  | -3.89667600 | -0.87333300 | -0.00930300 |
| C  | -4.11674700 | -1.62159600 | -1.19181500 |
| C  | -4.19679300 | -1.50064600 | 1.22521800  |
| C  | -4.57271000 | -2.94040300 | -1.14447200 |
| H  | -3.95695300 | -1.13174300 | -2.14910500 |
| C  | -4.64869900 | -2.81979800 | 1.27942700  |
| H  | -4.10139300 | -0.91747700 | 2.13756900  |
| C  | -4.83425100 | -3.54107400 | 0.09298300  |
| H  | -4.73683800 | -3.49689100 | -2.06487900 |
| H  | -4.86964800 | -3.28426400 | 2.23813300  |
| H  | -5.19851200 | -4.56555700 | 0.13255300  |
| Au | -1.83322800 | -0.13497500 | 0.01112100  |

Filename: TS\_AuCO2PhPPh3SO3\_2

Sum of electronic and zero-point Energies = -60281.5175

**Figure S50 (cont'd):** Cartesian coordinates and transition state energies (eV) for decarboxylation from  $[(\text{RCO}_2)\text{Au}(\text{P}^*)]^-$  (R = Me, Et, Ph,  $\text{CH}_2\text{Ph}$ ).

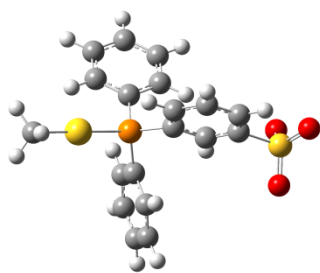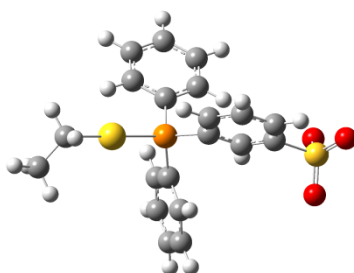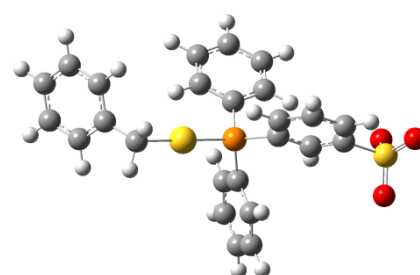

**[(Me)Au(PPh<sub>2</sub>C<sub>6</sub>H<sub>4</sub>SO<sub>3</sub>)<sup>-</sup>]**

|    |             |             |             |
|----|-------------|-------------|-------------|
| P  | 0.59670300  | 0.20082700  | -0.01317200 |
| C  | 0.61351500  | 1.66782800  | -1.13775100 |
| C  | 1.85308800  | 2.17658900  | -1.55834800 |
| C  | -0.56601100 | 2.29142500  | -1.57899200 |
| C  | 1.91530800  | 3.29714900  | -2.39264900 |
| H  | 2.76907700  | 1.68537600  | -1.23876800 |
| C  | -0.50113000 | 3.40812900  | -2.41596100 |
| H  | -1.53796200 | 1.90838200  | -1.28309500 |
| C  | 0.73773100  | 3.91499700  | -2.82243300 |
| H  | 2.88271000  | 3.67841600  | -2.71139100 |
| H  | -1.42303300 | 3.87662000  | -2.75093000 |
| H  | 0.78353100  | 4.78284800  | -3.47649100 |
| C  | 0.22369600  | 0.90752600  | 1.65021300  |
| C  | 0.49258700  | 2.24819900  | 1.96283900  |
| C  | -0.25616200 | 0.05635600  | 2.66021200  |
| C  | 0.28018400  | 2.72985600  | 3.25833500  |
| C  | 0.85895300  | 2.93282500  | 1.19557300  |
| C  | -0.47461600 | 0.54130100  | 3.95017900  |
| H  | -0.48165100 | -0.98241200 | 2.43525600  |
| C  | -0.20547100 | 1.87961700  | 4.25425700  |
| H  | 0.48419400  | 3.77434000  | 3.48228600  |
| H  | -0.86878900 | -0.12505200 | 4.71301700  |
| H  | -0.38319900 | 2.25781800  | 5.25805400  |
| C  | -0.89668300 | -0.75656400 | -0.46881200 |
| C  | -2.18585000 | -0.34611700 | -0.09707800 |
| C  | -0.73826600 | -1.90540300 | -1.26580600 |
| C  | -3.30748400 | -1.05270400 | -0.53734500 |
| H  | -2.33898500 | 0.52626300  | 0.53138700  |
| C  | -1.86326700 | -2.61330300 | -1.69358800 |
| H  | 0.25889800  | -2.23805400 | -1.54337500 |
| C  | -3.14733100 | -2.18621300 | -1.33652500 |
| H  | -1.73731600 | -3.50150400 | -2.30933300 |
| H  | -4.03570400 | -2.71345800 | -1.67131200 |
| S  | -4.97070800 | -0.46191400 | -0.05217400 |
| O  | -4.92162200 | 0.99365400  | -0.37638200 |
| O  | -5.04292100 | -0.75905400 | 1.40640300  |
| O  | -5.90209800 | -1.25955500 | -0.89771100 |
| Au | 2.65151500  | -1.02957600 | -0.03678400 |
| C  | 4.44104500  | -2.09873200 | -0.03741400 |
| H  | 4.96078800  | -1.98724200 | 0.92380200  |
| H  | 4.25283800  | -3.16819200 | -0.20243200 |
| H  | 5.11054100  | -1.74324400 | -0.83243300 |

Filename: AuMePPh3SO3\_3

Sum of electronic and zero-point Energies = -49934.7915

**[(Et)Au(PPh<sub>2</sub>C<sub>6</sub>H<sub>4</sub>SO<sub>3</sub>)<sup>-</sup>]**

|    |             |             |             |
|----|-------------|-------------|-------------|
| P  | 0.41684800  | 0.29217100  | -0.02538900 |
| C  | 0.31467300  | 1.90406500  | -0.92479100 |
| C  | 1.50905600  | 2.53084200  | -1.31556000 |
| C  | -0.91107700 | 2.52277800  | -1.22438100 |
| C  | 1.48183600  | 3.76100000  | -1.98025100 |
| H  | 2.46001300  | 2.04654000  | -1.10669200 |
| C  | -0.93565500 | 3.74943300  | -1.89239100 |
| H  | -1.84993400 | 2.05178200  | -0.94932400 |
| C  | 0.25890900  | 4.37241200  | -2.26929200 |
| H  | 2.41517800  | 4.23311100  | -2.27796100 |
| H  | -1.89230700 | 4.21290800  | -2.11958600 |
| H  | 0.23497300  | 5.32612000  | -2.79170900 |
| C  | 0.06580500  | 0.73081400  | 1.73207800  |
| C  | 0.30295500  | 2.01994600  | 2.23203700  |
| C  | -0.35705600 | -0.27512100 | 2.61755200  |
| C  | 0.11510700  | 2.29918600  | 3.58913700  |
| H  | 0.62518000  | 2.81282400  | 1.56339000  |
| C  | -0.55090700 | 0.00803100  | 3.97017500  |
| H  | -0.55814800 | -1.27681300 | 2.24802300  |
| C  | -0.31380800 | 1.29585300  | 4.46113300  |
| H  | 0.29377500  | 3.30607500  | 3.95926000  |
| H  | -0.90143900 | -0.77611500 | 4.63617900  |
| H  | -0.47246500 | 1.51664900  | 5.51389600  |
| C  | -1.03696000 | -0.67623100 | -0.57609800 |
| C  | -2.33401700 | -0.40009300 | -0.11753800 |
| C  | -0.84189100 | -1.68901200 | -1.53334300 |
| C  | -3.42859600 | -1.10340200 | -0.62560800 |
| H  | -2.51501900 | 0.36441600  | 0.63225100  |
| C  | -1.93962000 | -2.39458500 | -2.03047700 |
| H  | 0.16232100  | -1.91910000 | -1.88071300 |
| C  | -3.23263900 | -2.10029100 | -1.58335000 |
| H  | -1.78518100 | -3.17682900 | -2.77085400 |
| H  | -4.10090900 | -2.62660100 | -1.96856800 |
| S  | -5.10422600 | -0.69342900 | -0.01331100 |
| O  | -5.13895500 | 0.79623000  | -0.08878000 |
| O  | -5.11722700 | -1.23378200 | 1.37558300  |
| O  | -6.01899100 | -1.38903700 | -0.96090200 |
| Au | 2.54061300  | -0.80264400 | -0.28338700 |
| C  | 4.39213500  | -1.76294700 | -0.50484900 |
| H  | 4.19499400  | -2.79508600 | -0.83094200 |
| H  | 4.92741200  | -1.27894200 | -1.33553900 |
| C  | 5.28950100  | -1.78089200 | 0.74605000  |
| H  | 5.53733500  | -0.76634100 | 1.08395000  |
| H  | 4.80216200  | -2.28785700 | 1.58856600  |
| H  | 6.24340600  | -2.30379000 | 0.55918500  |

Filename: AuEtPPh3SO3\_3

Sum of electronic and zero-point Energies = -51003.6629

**[(PhCH<sub>2</sub>)Au(PPh<sub>2</sub>C<sub>6</sub>H<sub>4</sub>SO<sub>3</sub>)<sup>-</sup>]**

|    |             |             |             |
|----|-------------|-------------|-------------|
| P  | 0.31998200  | 0.26799700  | -0.01517800 |
| C  | 0.22931500  | 1.33239700  | 1.49146700  |
| C  | -1.03362100 | 1.70759200  | 1.97753200  |
| C  | 1.38156800  | 1.78115500  | 2.15961500  |
| C  | -1.44914000 | 2.52854400  | 3.10414600  |
| H  | -1.93066200 | 1.34771700  | 1.47940300  |
| C  | 1.26682300  | 2.59784700  | 3.28689500  |
| H  | 2.36964500  | 1.49129200  | 1.81488700  |
| C  | 0.00532300  | 2.97531900  | 3.75980000  |
| H  | -2.12990700 | 2.80848000  | 3.46986900  |
| H  | 2.16710600  | 2.93347900  | 3.79521200  |
| H  | -0.07921800 | 3.60889900  | 4.63978400  |
| C  | 0.83424000  | 1.41568100  | 1.36366000  |
| C  | 0.56528300  | 2.79101000  | -1.29855500 |
| C  | 1.42002000  | 0.88959700  | -2.52747800 |
| C  | 0.88261800  | 3.62541600  | -2.37447700 |
| H  | 0.11618500  | 3.21711900  | -0.40614500 |
| C  | 1.74177500  | 1.72613100  | -3.59717300 |
| H  | 1.64811000  | -0.17066000 | -2.59179800 |
| C  | 1.47265400  | 3.09649400  | -3.52488200 |
| H  | 0.67680200  | 4.69099000  | -2.30562300 |
| H  | 2.21672500  | 1.30680800  | -4.48023100 |
| H  | 1.73087700  | 3.74801300  | -4.35614600 |
| C  | 1.74284100  | -0.85357600 | 0.23863700  |
| C  | 3.06809800  | -0.41310400 | 0.10394000  |
| C  | 1.49019800  | -2.17940100 | 0.63672400  |
| C  | 4.13115700  | -1.27352400 | 0.38703100  |
| H  | 3.29601200  | 0.59897600  | -0.21705900 |
| C  | 2.55779300  | -3.03667700 | 0.91040400  |
| H  | 0.46559700  | -2.53137200 | 0.72849100  |
| C  | 3.87718800  | -2.58542300 | 0.79159300  |
| H  | 2.35905200  | -4.06110500 | 1.21836800  |
| H  | 4.72115600  | -3.23199300 | 1.01288700  |
| S  | 5.84288900  | -0.64930900 | 0.20992000  |
| O  | 5.80089100  | 0.66247200  | 0.91891900  |
| O  | 6.02787200  | -0.53955700 | -1.26480800 |
| O  | 6.68010100  | -1.69055300 | 0.86768800  |
| Au | -1.75320900 | -0.81029400 | -0.50245100 |
| C  | -3.59930700 | -1.74163100 | -0.94527000 |
| H  | -3.69052700 | -1.76446900 | -2.03834000 |
| H  | -3.52834000 | -2.77856300 | -0.59413500 |
| C  | -4.77330800 | -1.05001300 | -0.32777700 |
| C  | -5.24236200 | -1.39702900 | 0.95612800  |
| C  | -5.46128900 | -0.02018800 | -1.00247600 |
| C  | -6.33299800 | -0.74750000 | 1.53808000  |
| H  | -4.73282200 | -2.18730500 | 1.50495900  |
| C  | -6.55239800 | 0.63230500  | -0.42485400 |
| H  | -5.12444600 | 0.27288100  | -1.99547000 |
| C  | -6.99878900 | 0.27542000  | 0.85287200  |
| H  | -6.66580800 | -1.04274600 | 2.53164700  |
| H  | -7.05813600 | 1.42306300  | -0.97629800 |
| H  | -7.84827600 | 0.78279100  | 1.30431700  |

Filename: AuCH2PhPPh3SO3\_2

Sum of electronic and zero-point Energies = -56220.11917

**Figure S51:** Cartesian coordinates and energies (eV) for [(R)Au(PPh<sub>2</sub>C<sub>6</sub>H<sub>4</sub>SO<sub>3</sub>)<sup>-</sup>], R = Me, Et, Ph and CH<sub>2</sub>Ph.

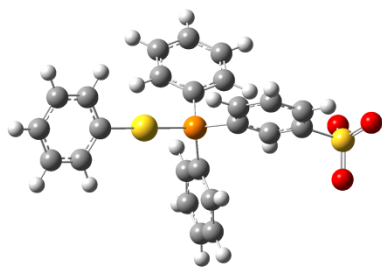

[(Ph)Au(PPh<sub>2</sub>C<sub>6</sub>H<sub>4</sub>SO<sub>3</sub>)]<sup>-</sup>

|    |             |             |             |
|----|-------------|-------------|-------------|
| P  | -0.17852300 | 0.48914100  | -0.01559200 |
| C  | -0.48581600 | 1.89187200  | -1.17755000 |
| C  | 0.60796900  | 2.65978300  | -1.60943000 |
| C  | -1.77414400 | 2.21926600  | -1.63349000 |
| C  | 0.41780700  | 3.74502200  | -2.47045300 |
| H  | 1.61027800  | 2.39992700  | -1.27725700 |
| C  | -1.96023200 | 3.30125900  | -2.49734600 |
| H  | -2.63526500 | 1.63232500  | -1.32894600 |
| C  | -0.86709400 | 4.06737700  | -2.91553600 |
| H  | 1.27469100  | 4.32925200  | -2.79756000 |
| H  | -2.96266200 | 3.53914000  | -2.84375900 |
| H  | -1.01649700 | 4.90710300  | -3.59038400 |
| C  | -0.69621700 | 1.13255400  | 1.63360300  |
| C  | -0.70956100 | 2.50619300  | 1.91708200  |
| C  | -0.99809200 | 0.22115900  | 2.65950200  |
| C  | -1.02416000 | 2.96023300  | 3.20149700  |
| H  | -0.48448400 | 3.22642400  | 1.13600300  |
| C  | -1.31839000 | 0.67763800  | 3.93871700  |
| H  | -1.00638500 | -0.84601500 | 2.45586400  |
| C  | -1.33079600 | 2.04860200  | 4.21434700  |
| H  | -1.03988300 | 4.02857500  | 3.40376800  |
| H  | -1.57234700 | -0.03951000 | 4.71484700  |
| H  | -1.58798700 | 2.40280500  | 5.20958600  |
| C  | -1.40644100 | -0.79900100 | -0.43857400 |
| C  | -2.75902400 | -0.67227000 | -0.08774500 |
| C  | -0.98537300 | -1.91299700 | -1.18798100 |
| C  | -3.68940000 | -1.62705300 | -0.50352100 |
| H  | -3.11109300 | 0.16718200  | 0.50453300  |
| C  | -1.91923100 | -2.86994900 | -1.59048600 |
| H  | 0.06398900  | -2.02622500 | -1.44869400 |
| C  | -3.27049900 | -2.72625200 | -1.25573700 |
| H  | -1.59077700 | -3.73080000 | -2.16900800 |
| H  | -4.01466500 | -3.45059400 | -1.57331000 |
| S  | -5.44743200 | -1.40270200 | -0.04538800 |
| O  | -5.70715900 | 0.02473300  | -0.39315400 |
| O  | -5.47233900 | -1.68814100 | 1.41692300  |
| O  | -6.17253200 | -2.39409700 | -0.88731200 |
| Au | 2.09861600  | -0.22839300 | -0.01955400 |
| C  | 4.07465800  | -0.83071700 | -0.01032400 |
| C  | 4.78140200  | -1.08037500 | -1.20662900 |
| C  | 4.79149800  | -1.01149200 | 1.19243700  |
| C  | 6.12204200  | -1.48598300 | -1.20638200 |
| H  | 4.27808300  | -0.95829500 | -2.16390000 |
| C  | 6.13208700  | -1.41677200 | 1.20368100  |
| H  | 4.29631700  | -0.83428400 | 2.14515200  |
| C  | 6.80559400  | -1.65632600 | 0.00164900  |
| H  | 6.63211200  | -1.66993800 | -2.15106500 |
| H  | 6.65022000  | -1.54627900 | 2.15297400  |
| H  | 7.84714900  | -1.97224600 | 0.00638500  |

Filename: AuPhPPH3SO3\_2

Sum of electronic and zero-point Energies = -55150.9758

**Figure S51 (cont'd):** Cartesian coordinates and energies (eV) for [(R)Au(PPh<sub>2</sub>C<sub>6</sub>H<sub>4</sub>SO<sub>3</sub>)]<sup>-</sup>, R = Me, Et, Ph and CH<sub>2</sub>Ph.

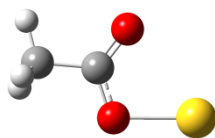

**[Au(O<sub>2</sub>CMe)]<sup>-</sup>**

|    |             |             |             |
|----|-------------|-------------|-------------|
| O  | -1.66565100 | 1.32476800  | -0.00455500 |
| O  | -1.08329400 | -0.85448000 | -0.01375600 |
| C  | -1.95646300 | 0.13074600  | -0.00905900 |
| C  | -3.39744400 | -0.36588400 | 0.00752600  |
| H  | -4.07311100 | 0.47720400  | -0.14568200 |
| H  | -3.55130500 | -1.12343700 | -0.76620600 |
| H  | -3.60692300 | -0.83185700 | 0.97659900  |
| Au | 0.82716900  | -0.01105600 | 0.00115200  |

Filename: AuCO2Me

Sum of electronic and zero-point Energies = -9910.3440

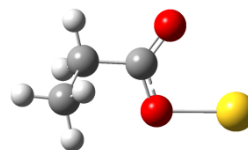

**[Au(O<sub>2</sub>CEt)]<sup>-</sup>**

|    |             |             |             |
|----|-------------|-------------|-------------|
| O  | 1.23253600  | 1.62497500  | -0.28039800 |
| O  | 0.89785100  | -0.51445900 | 0.35765700  |
| C  | 1.64864400  | 0.54058700  | 0.11574200  |
| C  | 3.13169200  | 0.27261300  | 0.39827500  |
| H  | 3.67039200  | 1.19530100  | 0.16618900  |
| H  | 3.23068500  | 0.08432100  | 1.47482900  |
| C  | 3.69994600  | -0.91652400 | -0.39004000 |
| H  | 4.76291300  | -1.04810300 | -0.15671300 |
| H  | 3.17350800  | -1.84224500 | -0.13968200 |
| H  | 3.61135600  | -0.75382000 | -1.47047600 |
| Au | -1.09333700 | -0.07467900 | -0.01564700 |

Filename: AuCO2Et

Sum of electronic and zero-point Energies = -10979.3524

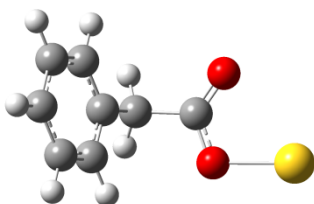

**[Au(O<sub>2</sub>CCH<sub>2</sub>Ph)]<sup>-</sup>**

|    |             |             |             |
|----|-------------|-------------|-------------|
| O  | -0.07962400 | 1.77658000  | -0.54202700 |
| O  | -0.34896600 | 0.03281100  | 0.87129100  |
| C  | 0.30101400  | 1.06424900  | 0.37902400  |
| C  | 1.64612900  | 1.29307900  | 1.09952500  |
| H  | 1.87043900  | 2.35922800  | 1.01128700  |
| H  | 1.52166200  | 1.04445600  | 2.15748600  |
| C  | 2.76256400  | 0.46551100  | 0.49148600  |
| C  | 2.92095800  | -0.88612400 | 0.83411300  |
| C  | 3.65665200  | 1.03949100  | -0.42323100 |
| C  | 3.95289900  | -1.64484800 | 0.27785000  |
| H  | 2.22763500  | -1.34381900 | 1.53575100  |
| C  | 4.69202500  | 0.28246600  | -0.97959300 |
| H  | 3.54092100  | 2.08467400  | -0.70059200 |
| C  | 4.84359100  | -1.06211800 | -0.63034300 |
| H  | 4.06376500  | -2.69020700 | 0.55548400  |
| H  | 5.37946500  | 0.74472700  | -1.68364100 |
| H  | 5.64936800  | -1.65155000 | -1.06046100 |
| Au | -2.14531000 | -0.23206200 | -0.13598000 |

Filename: AuCO2CH2Ph

Sum of electronic and zero-point Energies = -16195.5138

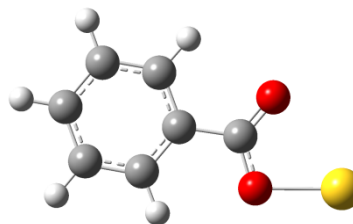

**[Au(O<sub>2</sub>CPh)]<sup>-</sup>**

|    |             |             |             |
|----|-------------|-------------|-------------|
| O  | 0.28872500  | 1.52297200  | 0.00004800  |
| O  | 0.00586600  | -0.70957100 | 0.00022300  |
| C  | 0.74684200  | 0.37598300  | 0.00011900  |
| C  | 2.22716600  | 0.11378100  | 0.00007800  |
| C  | 2.74399800  | -1.19071400 | 0.00004200  |
| C  | 3.10187200  | 1.21069800  | 0.00002900  |
| C  | 4.12538500  | -1.39337100 | -0.00005000 |
| H  | 2.06151700  | -2.03364100 | 0.00007600  |
| C  | 4.48174000  | 1.00316600  | -0.00005700 |
| H  | 2.68535800  | 2.21267500  | 0.00005300  |
| C  | 4.99565100  | -0.29826500 | -0.00010200 |
| H  | 4.52232800  | -2.40527800 | -0.00008600 |
| H  | 5.15598500  | 1.85577600  | -0.00009700 |
| H  | 6.07103800  | -0.45820200 | -0.00017800 |
| Au | -1.99226400 | -0.05830600 | -0.00002900 |

Filename: AuCO2Ph

Sum of electronic and zero-point Energies = -15126.5532

**Figure S52:** Cartesian coordinates and energies (eV) for [Au(O<sub>2</sub>CR)]<sup>-</sup>, R = Me, Et, Ph and CH<sub>2</sub>Ph.

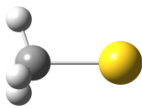

**[Au(Me)]<sup>-</sup>**

|    |             |             |             |
|----|-------------|-------------|-------------|
| C  | -1.82327700 | 0.00000100  | 0.00000100  |
| H  | -2.14876500 | 1.01927800  | -0.21993700 |
| H  | -2.14873200 | -0.70010900 | -0.77276100 |
| H  | -2.14880200 | -0.31918100 | 0.99266600  |
| Au | 0.22007500  | 0.00000000  | 0.00000000  |

Filename: AuMe

Sum of electronic and zero-point Energies = -4779.7178

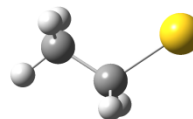

**[Au(Et)]<sup>-</sup>**

|    |             |             |             |
|----|-------------|-------------|-------------|
| C  | 1.48318200  | 0.68808400  | 0.00000000  |
| H  | 1.53147100  | 1.31885800  | -0.89294900 |
| H  | 1.53147100  | 1.31885600  | 0.89295000  |
| C  | 2.54112900  | -0.40791200 | 0.00000000  |
| H  | 3.54018700  | 0.05740500  | -0.00001100 |
| H  | 2.47496000  | -1.04622200 | 0.88651200  |
| H  | 2.47494700  | -1.04623800 | -0.88650000 |
| Au | -0.45188500 | -0.02890700 | 0.00000000  |

Filename: AuEt

Sum of electronic and zero-point Energies = -5848.7062

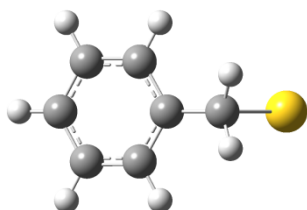

**[Au(CH<sub>2</sub>Ph)]<sup>-</sup>**

|    |             |             |             |
|----|-------------|-------------|-------------|
| C  | -0.09904500 | 0.00034500  | 1.24135000  |
| H  | 0.09802500  | -0.89676800 | 1.83346600  |
| H  | 0.09798900  | 0.89778200  | 1.83298700  |
| C  | -1.44124900 | 0.00015300  | 0.60298100  |
| C  | -2.10301900 | -1.20802200 | 0.31194900  |
| C  | -2.10319400 | 1.20815900  | 0.31165000  |
| C  | -3.37911100 | -1.20915400 | -0.25150300 |
| H  | -1.60614900 | -2.15142600 | 0.52777100  |
| C  | -3.37928900 | 1.20896500  | -0.25179800 |
| H  | -1.60647000 | 2.15169100  | 0.52724400  |
| C  | -4.02320100 | -0.00017700 | -0.53763400 |
| H  | -3.87293900 | -2.15351600 | -0.46672700 |
| H  | -3.87325900 | 2.15319800  | -0.46725700 |
| H  | -5.01720000 | -0.00030500 | -0.97729800 |
| Au | 1.45504600  | -0.00002900 | -0.14395100 |

Filename: AgCH2Ph

Sum of electronic and zero-point Energies = -11065.0114

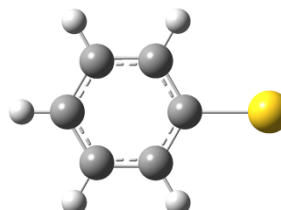

**[Au(Ph)]<sup>-</sup>**

|    |             |             |             |
|----|-------------|-------------|-------------|
| C  | -0.82535900 | 0.00000200  | 0.00016700  |
| C  | -1.52144800 | 1.21565200  | 0.00011300  |
| C  | -1.52144700 | -1.21565000 | 0.00011500  |
| C  | -2.92219200 | 1.20832200  | -0.00002700 |
| H  | -0.98964700 | 2.16141100  | 0.00019600  |
| C  | -2.92219100 | -1.20832300 | -0.00003200 |
| H  | -0.98964300 | -2.16140900 | 0.00022000  |
| C  | -3.62426300 | -0.00000100 | -0.00011700 |
| H  | -3.45960500 | 2.15380200  | -0.00004200 |
| H  | -3.45960300 | -2.15380500 | -0.00005500 |
| H  | -4.71128800 | -0.00000100 | -0.00023200 |
| Au | 1.18520500  | 0.00000000  | -0.00001800 |

Filename: AuPh

Sum of electronic and zero-point Energies = -9995.7182

**Figure S53:** Cartesian coordinates and energies (eV) for [Au(R)]<sup>-</sup>, R = Me, Et, Ph and CH<sub>2</sub>Ph.

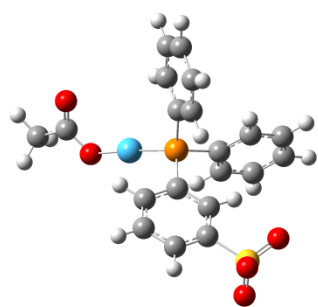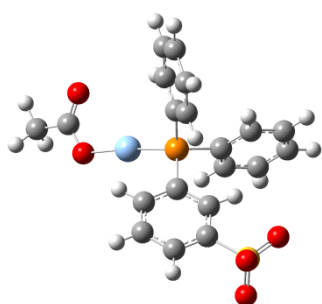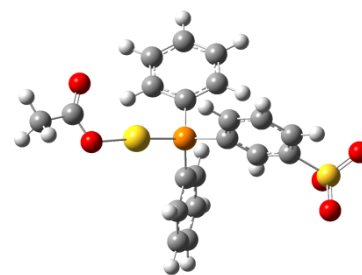

[(MeCO<sub>2</sub>)Cu(PPh<sub>2</sub>C<sub>6</sub>H<sub>4</sub>SO<sub>3</sub>)]<sup>-</sup>

|    |             |             |             |
|----|-------------|-------------|-------------|
| Cu | 2.44705500  | -0.96779000 | 0.23461800  |
| P  | 0.66437500  | 0.29873500  | 0.05275100  |
| C  | 0.90988500  | 1.75686300  | -1.04419500 |
| C  | 2.17271600  | 2.37466500  | -1.03876400 |
| C  | -0.09935400 | 2.26610700  | -1.87692800 |
| C  | 2.41733800  | 3.49112700  | -1.84254000 |
| H  | 2.96780200  | 1.97943600  | -0.41038200 |
| O  | 0.15114800  | 3.37859000  | -2.68711200 |
| H  | -1.08021200 | 1.79973800  | -1.90094200 |
| C  | 1.40699100  | 3.99410500  | -2.66969600 |
| H  | 3.39806300  | 3.96021800  | -1.82914500 |
| H  | -0.63707000 | 3.76237900  | -3.33034000 |
| H  | 1.59974500  | 4.85754700  | -3.30208700 |
| C  | 0.08053700  | 0.97749500  | 1.66068100  |
| C  | -0.53165400 | 2.23549100  | 1.78012400  |
| C  | 0.26359400  | 0.19070100  | 2.81118700  |
| C  | -0.95767400 | 2.69498300  | 3.03046500  |
| H  | -0.67955100 | 2.86124400  | 0.90462400  |
| C  | -0.17120000 | 0.64852900  | 4.05782400  |
| H  | 0.75056400  | -0.77895700 | 2.73308400  |
| C  | -0.78117400 | 1.90293600  | 4.16968800  |
| H  | -1.42913700 | 3.67137700  | 3.11168100  |
| H  | -0.02517600 | 0.03029700  | 4.94011800  |
| H  | -1.11324300 | 2.26286900  | 5.14042700  |
| C  | -0.78174500 | -0.59680700 | -0.66060300 |
| C  | -2.09001200 | -0.43110800 | -0.18280700 |
| C  | -0.54374200 | -1.48433900 | -1.72276500 |
| C  | -3.13630200 | -1.14311200 | -0.77400200 |
| H  | -2.30039100 | 0.24589300  | 0.63784500  |
| C  | -1.59970500 | -2.18392800 | -2.31195300 |
| H  | 0.46875900  | -1.63205400 | -2.09118100 |
| C  | -2.90335900 | -2.01928500 | -1.83843900 |
| H  | -1.40582400 | -2.86380500 | -3.13730300 |
| H  | -3.72316900 | -2.56629400 | -2.29448600 |
| S  | -4.81766200 | -0.97592200 | -0.12786300 |
| O  | -4.82334900 | 0.26011600  | 0.71685200  |
| O  | -5.07514900 | -2.22166100 | 0.66811400  |
| O  | -5.70891800 | -0.86977400 | -1.32845500 |
| O  | 5.37253000  | -0.96901900 | -0.74729100 |
| O  | 3.94320600  | -2.14384600 | 0.53537900  |
| C  | 5.10161300  | -1.93884900 | 0.00014000  |
| C  | 6.16431600  | -2.96950500 | 0.34137700  |
| H  | 7.10708000  | -2.75243900 | -0.16707600 |
| H  | 6.33391200  | -2.98152000 | 1.42508300  |
| H  | 5.82039600  | -3.97079000 | 0.05544900  |

Filename: Methanol\_CuCO2MePPh3SO3  
 Sum of electronic and zero-point Energies = -56745.9390

[(MeCO<sub>2</sub>)Ag(PPh<sub>2</sub>C<sub>6</sub>H<sub>4</sub>SO<sub>3</sub>)]<sup>-</sup>

|    |             |             |             |
|----|-------------|-------------|-------------|
| P  | 0.39404500  | 0.39701300  | 0.01337400  |
| C  | 0.51222600  | 1.90335900  | -1.03510300 |
| C  | 1.72437600  | 2.61531500  | -1.02707100 |
| C  | -0.54916500 | 2.36111800  | -1.83185100 |
| C  | 1.86615200  | 3.77652400  | -1.79071000 |
| H  | 2.55939500  | 2.26039700  | -0.42694900 |
| C  | -0.40020400 | 3.51898600  | -2.60277000 |
| H  | -1.49154600 | 1.82167900  | -1.85767900 |
| C  | 0.80391400  | 4.22979800  | -2.58134600 |
| H  | 2.80777700  | 4.31970100  | -1.77975000 |
| H  | -1.22755600 | 3.86344900  | -3.21838200 |
| H  | 0.91694400  | 5.12906900  | -3.18186800 |
| C  | -0.15345100 | 0.97625100  | 1.67069700  |
| C  | -0.82311300 | 2.19531600  | 1.86359700  |
| C  | 0.11487200  | 0.15531400  | 2.77974600  |
| C  | -1.22381600 | 2.58145300  | 3.14672600  |
| H  | -1.03518500 | 2.84636100  | 1.02048000  |
| C  | -0.29515200 | 0.53982600  | 4.05883700  |
| H  | 0.64827800  | -0.78328600 | 2.64495300  |
| C  | -0.96418200 | 1.75474800  | 4.24449300  |
| H  | -1.74083400 | 3.52779800  | 3.28543800  |
| H  | -0.08362300 | -0.10407800 | 4.90890700  |
| H  | -1.27650000 | 2.05795600  | 5.24080700  |
| C  | -1.01663000 | -0.56954900 | -0.67086900 |
| C  | -2.32174900 | -0.45418700 | -0.16759500 |
| C  | -0.76164800 | -1.45098200 | -1.73287200 |
| C  | -3.34769000 | -1.21205100 | -0.73451500 |
| H  | -2.54393900 | 0.21701600  | 0.65450200  |
| C  | -1.79928500 | -2.19761000 | -2.29781700 |
| H  | 0.24905300  | -1.55855000 | -2.11963600 |
| C  | -3.09836200 | -2.08434500 | -1.79943800 |
| H  | -1.59274000 | -2.87510200 | -3.12197600 |
| H  | -3.90261000 | -2.67013800 | -2.23521200 |
| S  | -5.03287800 | -1.08915000 | -0.08803400 |
| O  | -5.01582800 | 0.00064200  | 0.93619200  |
| O  | -5.34525600 | -2.43501500 | 0.49677000  |
| O  | -5.89686100 | -0.76792600 | -1.27052700 |
| O  | 5.50679200  | -0.34288900 | -0.16953300 |
| O  | 4.16915100  | -2.12740600 | 0.12360000  |
| C  | 5.32741900  | -1.57579900 | -0.01930900 |
| C  | 6.51006500  | -2.52985600 | 0.00235100  |
| H  | 7.45551600  | -1.99433300 | -0.11578000 |
| H  | 6.52387100  | -3.08411100 | 0.94842100  |
| H  | 6.40830300  | -3.26611000 | -0.80411300 |
| Ag | 2.42487900  | -0.85228800 | 0.07612500  |

Filename: Methanol\_AgCO2MePPh3SO3\_2  
 Sum of electronic and zero-point Energies = -55375.4082

[(MeCO<sub>2</sub>)Au(PPh<sub>2</sub>C<sub>6</sub>H<sub>4</sub>SO<sub>3</sub>)]<sup>-</sup>

|    |             |             |             |
|----|-------------|-------------|-------------|
| P  | 0.13781000  | 0.48198100  | 0.02034000  |
| C  | 0.21373600  | 1.87132800  | -1.17731500 |
| C  | 1.39715000  | 2.62664400  | -1.24844700 |
| C  | -0.86824900 | 2.20349200  | -2.00798900 |
| C  | 1.49033800  | 3.70744800  | -2.12844100 |
| H  | 2.24656300  | 2.36638400  | -0.62157700 |
| C  | -0.76731300 | 3.28172600  | -2.89298100 |
| H  | -1.78902300 | 1.62903100  | -1.97352000 |
| C  | 0.40870900  | 4.03560800  | -2.95354800 |
| H  | 2.41018700  | 4.28479600  | -2.17584700 |
| H  | -1.60967800 | 3.52930100  | -3.53407500 |
| H  | 0.48458500  | 4.87164200  | -3.64442800 |
| C  | -0.46602300 | 1.18157200  | 1.60734100  |
| C  | -1.06382300 | 2.44821000  | 1.68857600  |
| C  | -0.32242100 | 0.40794400  | 2.77261000  |
| C  | -1.51555700 | 2.93245000  | 2.92112900  |
| H  | -1.18127200 | 3.06094300  | 0.79982300  |
| C  | -0.78278900 | 0.89183100  | 3.99873000  |
| H  | 0.15110000  | -0.56973700 | 2.72335400  |
| C  | -1.37825200 | 2.15654700  | 4.07565500  |
| H  | -1.97531700 | 3.91612500  | 2.97448500  |
| H  | -0.66863500 | 0.28533700  | 4.89366000  |
| H  | -1.73009000 | 2.53531500  | 5.03206600  |
| C  | -1.18842000 | -0.64334100 | -0.57424700 |
| C  | -2.52643300 | -0.46877400 | -0.18986100 |
| C  | -0.84778500 | -1.68741500 | -1.44844500 |
| C  | -3.50365700 | -1.33048300 | -0.69209800 |
| H  | -2.81098700 | 0.33000300  | 0.64679800  |
| C  | -1.83612800 | -2.54033100 | -1.94551500 |
| H  | 0.18930200  | -1.83657200 | -1.73795200 |
| C  | -3.16983300 | -2.36727700 | -1.56887900 |
| H  | -1.56556200 | -3.34536500 | -2.62335500 |
| H  | -3.93750300 | -3.03113100 | -1.95500500 |
| S  | -5.22243200 | -1.14074600 | -0.15944600 |
| O  | -5.35740000 | 0.27225000  | 0.31678300  |
| O  | -5.42483300 | -2.14219200 | 0.93899400  |
| O  | -6.05919900 | -1.43551400 | -1.36624500 |
| O  | 4.90669700  | -0.87020700 | -1.34013000 |
| O  | 4.00273600  | -1.53711200 | 0.61541600  |
| C  | 4.97522900  | -1.46373000 | -0.24393600 |
| C  | 6.24708100  | -2.16961700 | 0.18777900  |
| H  | 7.00748000  | -2.12212100 | -0.59546500 |
| H  | 6.63770800  | -1.70209200 | 1.09983000  |
| H  | 6.03191100  | -3.21795200 | 0.42487100  |
| Au | 2.15295700  | -0.56585400 | 0.25662200  |

Filename: Methanol\_AuCO2MePPh3SO3  
 Sum of electronic and zero-point Energies = -55069.9152

**Figure S54:** Cartesian coordinates and energies (eV) for [(MeCO<sub>2</sub>)M(PPh<sub>2</sub>C<sub>6</sub>H<sub>4</sub>SO<sub>3</sub>)]<sup>-</sup> in methanol bound through P.

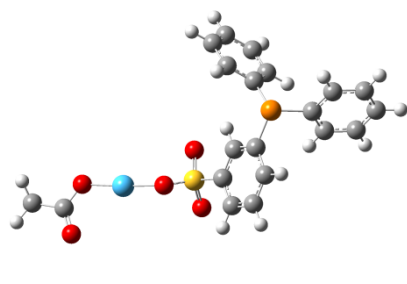

$[(\text{MeCO}_2)\text{Cu}(\text{O}_3\text{SC}_6\text{H}_4\text{PPh}_2)]^-$

|    |             |             |             |
|----|-------------|-------------|-------------|
| Cu | 4.45017000  | 0.08097700  | -0.09173800 |
| P  | -3.36735300 | 0.20512900  | -1.37174500 |
| C  | -1.96691400 | -0.92407100 | -0.91658200 |
| C  | -0.83218600 | -0.50713000 | -0.20441000 |
| C  | -2.01328200 | -2.24608000 | -1.39666800 |
| C  | 0.21341100  | -1.40672300 | 0.02139500  |
| H  | -0.75647800 | 0.50551200  | 0.17568600  |
| C  | -0.96920800 | -3.13981900 | -1.14796600 |
| H  | -2.87535200 | -2.58498700 | -1.96746700 |
| C  | 0.15972400  | -2.72532000 | -0.43672700 |
| H  | -1.02924600 | -4.16057500 | -1.51631500 |
| H  | 0.97721200  | -3.41470100 | -0.24893400 |
| S  | 1.69095600  | -0.84713100 | 0.88271100  |
| O  | 1.36755600  | 0.43784200  | 1.55927500  |
| O  | 2.69360600  | -0.65542200 | -0.26104400 |
| O  | 2.11565800  | -1.93854900 | 1.80319600  |
| O  | 7.28726100  | -0.94863000 | -0.57280200 |
| O  | 6.15450400  | 0.90854100  | 0.01531700  |
| C  | 7.24411300  | 0.25819600  | -0.23817600 |
| C  | 8.52414000  | 1.05982600  | -0.08125800 |
| H  | 9.37985000  | 0.52283400  | -0.49849500 |
| H  | 8.42999400  | 2.03794100  | -0.56545000 |
| H  | 8.70754400  | 1.23966400  | 0.98613000  |
| C  | -4.76306500 | -0.44004000 | -0.33656300 |
| C  | -6.06498900 | -0.09141200 | -0.74074300 |
| C  | -4.60560200 | -1.25959000 | 0.79420400  |
| C  | -7.18055300 | -0.53481300 | -0.02365800 |
| H  | -6.20980400 | 0.52812400  | -1.62383400 |
| C  | -5.72209700 | -1.71347500 | 1.50483600  |
| H  | -3.61261500 | -1.54935800 | 1.12640700  |
| C  | -7.01132300 | -1.35025600 | 1.10075800  |
| H  | -8.17896100 | -0.25248700 | -0.34956300 |
| H  | -5.58202300 | -2.34786600 | 2.37713800  |
| H  | -7.87758500 | -1.70465000 | 1.65436400  |
| C  | -2.91704900 | 1.79595100  | -0.53535900 |
| C  | -2.28759700 | 2.77657400  | -1.32306000 |
| C  | -3.18337500 | 2.08283600  | 0.81443600  |
| C  | -1.91620200 | 4.00718100  | -0.77136700 |
| H  | -2.08528000 | 2.57864100  | -2.37377800 |
| C  | -2.82199800 | 3.31717100  | 1.36375600  |
| H  | -3.67141900 | 1.34408700  | 1.44414200  |
| C  | -2.18554700 | 4.28108700  | 0.57360900  |
| H  | -1.42574600 | 4.75200500  | -1.39371000 |
| H  | -3.03637500 | 3.52390100  | 2.40982200  |
| H  | -1.90471500 | 5.23994600  | 1.00277500  |

Filename: Methanol\_CuCO2MeSO3PPH3  
 Sum of electronic and zero-point Energies = -56745.4324

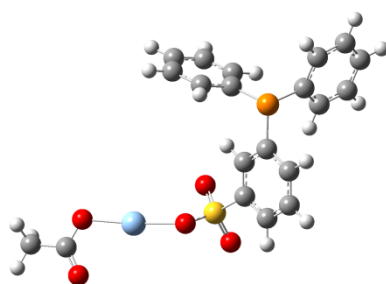

$[(\text{MeCO}_2)\text{Ag}(\text{O}_3\text{SC}_6\text{H}_4\text{PPh}_2)]^-$

|    |             |             |             |
|----|-------------|-------------|-------------|
| P  | -3.64709800 | 0.40778300  | -1.34853400 |
| C  | -2.43956400 | -0.97172800 | -1.06145400 |
| C  | -1.24366900 | -0.83179500 | -0.34247900 |
| C  | -2.73141500 | -2.21576200 | -1.65091400 |
| C  | -0.37784900 | -1.92272600 | -0.21789800 |
| H  | -0.98726700 | 0.11236500  | 0.12604200  |
| C  | -1.86505400 | -3.30147800 | -1.50683600 |
| H  | -3.64702700 | -2.34031800 | -2.22546500 |
| C  | -0.67342700 | -3.16214500 | -0.78958500 |
| H  | -2.11221500 | -4.25754900 | -1.92789700 |
| H  | 0.00680300  | -4.00853300 | -0.67984600 |
| S  | 1.18106100  | -1.70743300 | 0.65771800  |
| O  | 0.99989700  | -0.59757600 | 1.63426700  |
| O  | 2.17098100  | -1.32827400 | -0.44368900 |
| O  | 1.52852800  | -3.01945600 | 1.27194200  |
| O  | 6.97340700  | -0.34742600 | -0.19145800 |
| O  | 5.53844200  | 1.32929700  | 0.24117800  |
| O  | 6.72802100  | 0.84082800  | 0.12742900  |
| C  | 7.86276100  | 1.80535400  | 0.43108200  |
| H  | 8.83019400  | 1.37575400  | -0.15886200 |
| H  | 7.71664700  | 2.75117100  | -0.10212100 |
| H  | 7.86470800  | 2.03196500  | 1.50496600  |
| C  | -4.97376100 | 0.04950600  | -0.10475200 |
| C  | -6.21297900 | 0.68817800  | -0.29706800 |
| C  | -4.83155300 | -0.83164200 | 0.98024100  |
| C  | -7.27661700 | 0.46726700  | 0.58291600  |
| H  | -6.34951000 | 1.36109000  | -1.14160000 |
| C  | -5.90011500 | -1.06293300 | 1.85391100  |
| H  | -3.88793600 | -1.34218100 | 1.15105700  |
| H  | -7.12319600 | -0.41240300 | 1.66055900  |
| H  | -8.22557800 | 0.97302100  | 0.42010200  |
| H  | -5.77310600 | -1.74929100 | 2.68806100  |
| H  | -7.95220400 | -0.59357800 | 2.34056900  |
| C  | -2.78086000 | 1.88214300  | -0.63648700 |
| C  | -2.01143700 | 2.65845000  | -1.52245500 |
| C  | -2.87038300 | 2.28204900  | 0.70758200  |
| C  | -1.33160700 | 3.79448900  | -1.07259500 |
| H  | -1.94307300 | 2.37491200  | -2.57099900 |
| C  | -2.19995400 | 3.42546300  | 1.15543700  |
| H  | -3.46185100 | 1.70340300  | 1.41175900  |
| C  | -1.42690200 | 4.18236300  | 0.26838900  |
| H  | -0.73732400 | 4.37978700  | -1.77038600 |
| H  | -2.27974300 | 3.72151600  | 2.19894200  |
| H  | -0.90595300 | 5.07032400  | 0.61855600  |
| Ag | 3.91577100  | -0.06048400 | -0.08406700 |

Filename: Methanol\_AgCO2MeSO3PPH3  
 Sum of electronic and zero-point Energies = -55374.7850

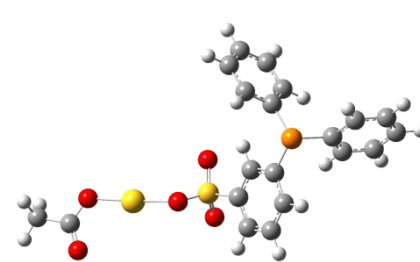

$[(\text{MeCO}_2)\text{Au}(\text{O}_3\text{SC}_6\text{H}_4\text{PPh}_2)]^-$

|    |             |             |             |
|----|-------------|-------------|-------------|
| P  | -4.28019500 | 0.18771500  | -1.36774200 |
| C  | -2.84571300 | -0.92141600 | -0.97376400 |
| C  | -1.70753400 | -0.50449900 | -0.26773800 |
| C  | -2.88006000 | -2.23203600 | -1.48463700 |
| C  | -0.64875400 | -1.39663000 | -0.07827700 |
| H  | -1.64134500 | 0.49913000  | 0.13726100  |
| C  | -1.82045500 | -3.11724200 | -1.27321000 |
| H  | -3.74585100 | -2.56902900 | -1.05091700 |
| C  | -0.68793800 | -2.70458500 | -0.56728100 |
| H  | -1.87146900 | -4.12925300 | -1.66590800 |
| H  | 0.14126700  | -3.38635600 | -0.40537000 |
| S  | 0.82092900  | -0.84516200 | 0.79599800  |
| O  | 0.50143400  | -0.42370800 | 1.49693900  |
| O  | 1.81199500  | -0.61715300 | -0.37280000 |
| O  | 1.27492400  | -1.95142200 | 1.67813700  |
| O  | 6.67622000  | -0.96770900 | -0.61605700 |
| O  | 5.65616000  | 0.85239700  | 0.24702800  |
| C  | 6.70848300  | 0.16884100  | -0.10879700 |
| C  | 8.01794000  | 0.89506700  | 0.13092900  |
| H  | 8.86778600  | -0.23739400 | -0.06623400 |
| H  | 8.07731800  | 1.76654300  | -0.53284100 |
| H  | 8.06742000  | 1.26362100  | 1.16145800  |
| C  | -5.61007000 | -0.46407700 | -0.25347700 |
| C  | -6.93558900 | -0.12899200 | -0.58601700 |
| C  | -5.38202400 | -1.27679700 | 0.87008300  |
| C  | -8.00502600 | -0.57909400 | 0.19416800  |
| H  | -7.13504800 | 0.48541700  | -1.46199400 |
| C  | -6.45293500 | -1.73808400 | 1.64352100  |
| H  | -4.36896500 | -1.55415200 | 1.14812400  |
| C  | -7.76595900 | -1.38850500 | 1.31030300  |
| H  | -9.02263800 | -0.30737000 | -0.07666100 |
| H  | -6.25861200 | -2.36727900 | 2.50917700  |
| H  | -8.59674900 | -1.74821700 | 1.91270500  |
| C  | -3.80577100 | 1.79215900  | -0.57235900 |
| C  | -3.19668000 | 2.75762000  | -1.39447100 |
| C  | -4.04040100 | 2.10583600  | 0.77724400  |
| C  | -2.81399600 | 3.99917200  | -0.87659000 |
| H  | -3.01983300 | 2.53953400  | -2.44587300 |
| C  | -3.66768600 | 3.35150100  | 1.29293500  |
| H  | -4.51353500 | 1.38001000  | 1.43282000  |
| C  | -3.05153000 | 4.29979100  | 0.46884300  |
| H  | -2.34005800 | 4.73194700  | -1.52544700 |
| H  | -3.85739600 | 3.57885600  | 2.33948000  |
| H  | -2.76187200 | 5.26741900  | 0.87166600  |
| Au | 3.76243000  | 0.07078300  | -0.03133800 |

Filename: Methanol\_AuCO2MeSO3PPH3\_2  
 Sum of electronic and zero-point Energies = -55068.7183

**Figure S55:** Cartesian coordinates and energies (eV) for  $[(\text{MeCO}_2)\text{M}(\text{PPh}_2\text{C}_6\text{H}_4\text{SO}_3)]^-$  in methanol bound through O.

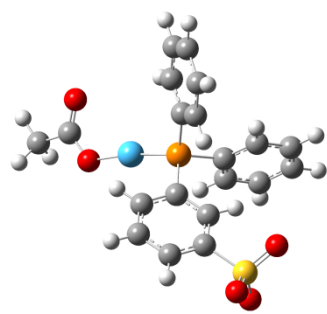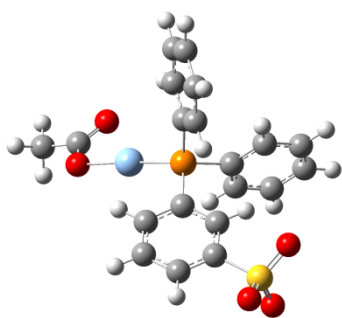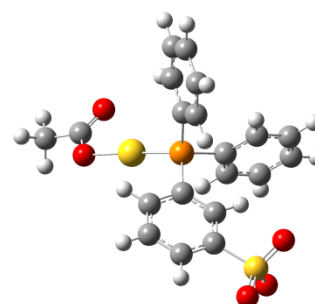

$[(\text{MeCO}_2)\text{Cu}(\text{PPh}_2\text{C}_6\text{H}_4\text{SO}_3)]^-$

|    |             |             |             |
|----|-------------|-------------|-------------|
| Cu | 2.46337600  | -0.94043300 | 0.10391300  |
| P  | 0.67460700  | 0.33355800  | 0.03780900  |
| C  | 0.85901900  | 1.85873300  | -0.97560900 |
| C  | 2.10968300  | 2.50038400  | -0.97701600 |
| C  | -0.19074900 | 2.39882400  | -1.73582900 |
| C  | 2.30205600  | 3.67151700  | -1.71493500 |
| H  | 2.93452500  | 2.08201200  | -0.40523600 |
| C  | 0.00731200  | 3.56612900  | -2.48040100 |
| H  | -1.16215800 | 1.91365600  | -1.75352900 |
| C  | 1.25103900  | 4.20601500  | -2.46867700 |
| H  | 3.27288200  | 4.15985900  | -1.70732900 |
| H  | -0.81162400 | 3.97395600  | -3.06717500 |
| H  | 1.40255600  | 5.11260600  | -3.04862600 |
| C  | 0.09179400  | 0.90113200  | 1.68868800  |
| C  | -0.57697700 | 2.12052400  | 1.88290200  |
| C  | 0.32881200  | 0.06386300  | 2.79265800  |
| C  | -1.00696700 | 2.49129200  | 3.16092700  |
| H  | -0.76447700 | 2.78409000  | 1.04401500  |
| C  | -0.10964100 | 0.43294700  | 4.06726200  |
| H  | 0.85999300  | -0.87526600 | 2.65627100  |
| C  | -0.77748600 | 1.64836100  | 4.25343100  |
| H  | -1.52203000 | 3.43815900  | 3.30050000  |
| H  | 0.07777900  | -0.22354000 | 4.91283400  |
| H  | -1.11261300 | 1.93939900  | 5.24553700  |
| C  | -0.76126800 | -0.55469900 | -0.70705700 |
| C  | -2.06618000 | -0.43723900 | -0.21259200 |
| C  | -0.51592600 | -1.38894800 | -1.81178900 |
| C  | -3.10541300 | -1.14475400 | -0.82606000 |
| H  | -2.27705500 | 0.20104500  | 0.63878900  |
| C  | -1.56189000 | -2.08397700 | -2.42020400 |
| H  | 0.49567600  | -1.49802800 | -2.19451600 |
| C  | -2.86562700 | -1.96913400 | -1.92704700 |
| H  | -1.36274900 | -2.72328200 | -3.27559100 |
| H  | -3.67944000 | -2.51261800 | -2.39534500 |
| S  | -4.77017600 | -1.02806700 | -0.13001700 |
| O  | -4.93694700 | 0.39586000  | 0.30821200  |
| O  | -4.80163000 | -1.98684500 | 1.02546500  |
| O  | -5.71335900 | -1.41725600 | -1.22646500 |
| O  | 5.51860900  | -0.79348000 | -0.32878700 |
| O  | 3.87916100  | -2.25078100 | 0.18695700  |
| C  | 5.11922200  | -1.94329700 | -0.01843200 |
| C  | 6.10641600  | -3.08585700 | 0.14079900  |
| H  | 7.12782600  | -2.76091700 | -0.07004300 |
| H  | 6.05615600  | -3.47633000 | 1.16413100  |
| H  | 5.84048500  | -3.90741600 | -0.53419700 |

Filename: Water\_CuCO2MePPh3SO3\_3  
 Sum of electronic and zero-point Energies = -56745.8750

$[(\text{MeCO}_2)\text{Ag}(\text{PPh}_2\text{C}_6\text{H}_4\text{SO}_3)]^-$

|    |             |             |             |
|----|-------------|-------------|-------------|
| P  | 0.39183300  | 0.40209200  | -0.04717900 |
| C  | 0.35610900  | 2.03159200  | -0.89826900 |
| C  | 1.52597400  | 2.81071900  | -0.86954500 |
| C  | -0.77856800 | 2.51874000  | -1.56546600 |
| C  | 1.55403900  | 4.06521000  | -1.48320800 |
| H  | 2.41620200  | 2.43591400  | -0.36975400 |
| C  | -0.74322700 | 3.77083300  | -2.18880100 |
| H  | -1.69020700 | 1.93037100  | -1.60406000 |
| C  | 0.41926800  | 4.54651400  | -2.14651800 |
| H  | 2.46317900  | 4.65977800  | -1.45208700 |
| H  | -1.62630700 | 4.13741500  | -2.70554200 |
| H  | 0.44385700  | 5.51846200  | -2.63210500 |
| C  | -0.03802600 | 0.74759200  | 1.70678500  |
| C  | -0.68368700 | 1.92738300  | 2.10916800  |
| C  | 0.30308500  | -0.21557700 | 2.67206600  |
| C  | -0.98871600 | 2.13546100  | 3.45848400  |
| H  | -0.94950300 | 2.68524900  | 1.37825900  |
| C  | -0.01216900 | -0.00882900 | 4.01711400  |
| H  | 0.81903800  | -1.12512200 | 2.37323000  |
| C  | -0.65652900 | 1.16890000  | 4.41305000  |
| H  | -1.48709200 | 3.05278300  | 3.76081300  |
| H  | 0.25467200  | -0.76106300 | 4.75459500  |
| H  | -0.89323500 | 1.33417000  | 5.46081000  |
| C  | -1.03152400 | -0.54907000 | -0.72666100 |
| C  | -2.32210200 | -0.45092800 | -0.18849600 |
| C  | -0.80334800 | -1.39864600 | -1.82205500 |
| C  | -3.36429000 | -1.19188800 | -0.75307800 |
| H  | -2.51884800 | 0.19922300  | 0.65739600  |
| C  | -1.85362400 | -2.12966600 | -2.38058300 |
| H  | 0.19802300  | -1.49277800 | -2.23463500 |
| C  | -3.14152300 | -2.03296800 | -1.84619000 |
| H  | -1.66852800 | -2.78253700 | -3.22873800 |
| H  | -3.95783700 | -2.60375400 | -2.27621500 |
| S  | -5.00947300 | -1.09925600 | -0.00765500 |
| O  | -5.17656100 | 0.31765400  | 0.45169200  |
| O  | -4.99992900 | -2.07282900 | 1.13534400  |
| O  | -5.97840200 | -1.48435300 | -1.08292400 |
| O  | 5.33581000  | -0.62456700 | 0.89810500  |
| O  | 4.29297600  | -1.86587100 | -0.66343700 |
| C  | 5.32638500  | -1.54588400 | 0.04271000  |
| C  | 6.57153000  | -2.38310200 | -0.19281400 |
| H  | 7.45206500  | -1.91697800 | 0.25580200  |
| H  | 6.42712200  | -3.37118900 | 0.26234100  |
| H  | 6.73935000  | -2.53711700 | -1.26359400 |
| Ag | 2.47290700  | -0.74180200 | -0.30559100 |

Filename: Water\_AgCO2MePPh3SO3\_2  
 Sum of electronic and zero-point Energies = -55375.3450

$[(\text{MeCO}_2)\text{Au}(\text{PPh}_2\text{C}_6\text{H}_4\text{SO}_3)]^-$

|    |             |             |             |
|----|-------------|-------------|-------------|
| P  | 0.14193600  | 0.51936100  | -0.00413800 |
| C  | 0.20911800  | 2.19871700  | -0.74141700 |
| C  | 1.40539800  | 2.92895300  | -0.63668800 |
| C  | -0.89715300 | 2.77161600  | -1.38823600 |
| C  | 1.48826400  | 4.22057600  | -1.16176200 |
| H  | 2.27162700  | 2.48716500  | -0.15094100 |
| C  | -0.80635400 | 4.06192300  | -1.92027300 |
| H  | -1.82784300 | 2.22007700  | -1.74851000 |
| C  | 0.38317000  | 4.78804800  | -1.80661900 |
| H  | 2.41708800  | 4.77797800  | -1.07580900 |
| H  | -1.66667900 | 4.49646600  | -2.42221000 |
| H  | 0.45100700  | 5.79012900  | -2.22174800 |
| C  | -0.32209700 | 0.73856500  | 1.75665100  |
| C  | -0.98767900 | 1.88782900  | 2.21180400  |
| C  | -0.00430900 | -0.28404600 | 2.66660900  |
| C  | -1.33371600 | 2.00798600  | 3.56136900  |
| H  | -1.23704700 | 2.68932800  | 1.52309300  |
| C  | -0.35978900 | -0.16328300 | 4.01196700  |
| H  | 0.52484100  | -1.16983400 | 2.32483500  |
| C  | -1.02287900 | 0.98404700  | 4.46176900  |
| H  | -1.84593200 | 2.90228100  | 3.90602300  |
| H  | -0.11069500 | -0.95984000 | 4.70782400  |
| H  | -1.29124000 | 1.08123100  | 5.51039500  |
| C  | -1.27496000 | -0.32736500 | -0.81414100 |
| C  | -2.52900400 | -0.42127000 | -0.20101500 |
| C  | -1.08195300 | -0.88589600 | -2.09037100 |
| C  | -3.57591600 | -1.06837600 | -0.86783600 |
| H  | -2.69461100 | 0.00302900  | 0.78382600  |
| C  | -2.13563900 | -1.52021500 | -2.74653000 |
| H  | -0.10745700 | -0.82642700 | -2.56763900 |
| C  | -3.39149700 | -1.61834300 | -2.13612100 |
| H  | -1.98088000 | -1.94766500 | -3.73302300 |
| H  | -4.21094800 | -2.11759800 | -2.64150900 |
| S  | -5.17774600 | -1.19158800 | -0.03804400 |
| O  | -5.55950300 | 0.21186800  | 0.32840000  |
| O  | -4.94848700 | -2.05163500 | 1.17000300  |
| O  | -6.11843800 | -1.81211800 | -1.02319100 |
| O  | 5.04894900  | -0.58524600 | 0.93904800  |
| O  | 3.86324600  | -1.78041600 | -0.56371900 |
| C  | 4.94775400  | -1.50870700 | 0.10176100  |
| C  | 6.11908900  | -2.42263400 | -0.20258300 |
| H  | 7.01632900  | -2.10119600 | 0.33075300  |
| H  | 5.87057900  | -3.44825600 | 0.09493000  |
| H  | 6.31813500  | -2.43498500 | -1.27987600 |
| Au | 2.09561300  | -0.63588900 | -0.25432900 |

Filename: Water\_AuCO2MePPh3SO3  
 Sum of electronic and zero-point Energies = -55069.8419

**Figure S56:** Cartesian coordinates and energies (eV) for  $[(\text{MeCO}_2)\text{M}(\text{PPh}_2\text{C}_6\text{H}_4\text{SO}_3)]^-$  in water bound through P.



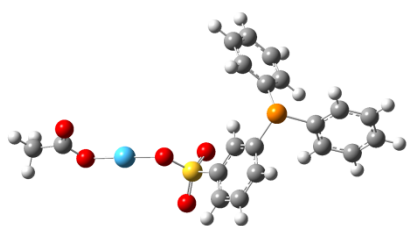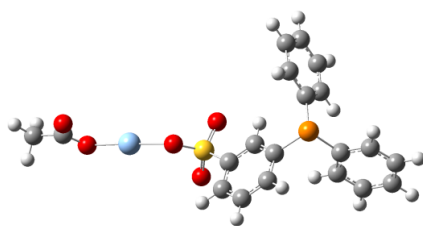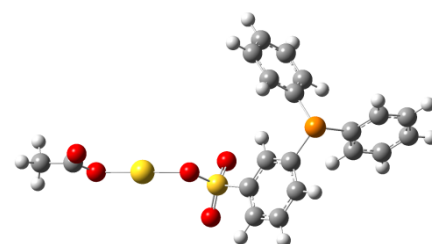

$[(\text{MeCO}_2)\text{Cu}(\text{O}_3\text{SC}_6\text{H}_4\text{PPh}_2)]^-$

|    |             |             |             |
|----|-------------|-------------|-------------|
| Cu | 4.38395300  | -0.19017200 | 0.16251300  |
| P  | -3.28675200 | 0.39712200  | -1.39273400 |
| C  | -1.95966900 | -0.85277600 | -1.04312800 |
| C  | -0.84250900 | -0.60426000 | -0.23464400 |
| C  | -2.06365900 | -2.10080100 | -1.68646100 |
| C  | 0.13500900  | -1.59349400 | -0.08006300 |
| H  | -0.73164100 | 0.34702100  | 0.27438900  |
| C  | -1.09002300 | -3.08468100 | -1.51052100 |
| H  | -2.91666000 | -2.30767500 | -2.32877400 |
| C  | 0.02597700  | -2.83662800 | -0.70529900 |
| H  | -1.19376100 | -4.04581800 | -2.00620300 |
| H  | 0.79007500  | -3.59478900 | -0.57144400 |
| S  | 1.59459400  | -1.23055600 | 0.90795700  |
| O  | 1.17756500  | -0.33833000 | 2.02236800  |
| O  | 2.50758300  | -0.49984800 | -0.08423600 |
| O  | 2.17752700  | -2.52815300 | 1.34780000  |
| O  | 6.49098000  | 1.28787600  | -1.48043200 |
| O  | 6.25194300  | 0.07064000  | 0.40296000  |
| C  | 6.95766500  | 0.74296200  | -0.45040200 |
| C  | 8.43600700  | 0.84672300  | -0.12254400 |
| H  | 8.98366900  | 1.35213000  | -0.92123100 |
| H  | 8.56553900  | 1.40723800  | 0.81114200  |
| H  | 8.85849300  | -0.15189600 | 0.03509500  |
| C  | -4.69420300 | -0.23342500 | -0.36520200 |
| C  | -5.98817300 | 0.17649300  | -0.73404300 |
| C  | -4.54854800 | -1.10342600 | 0.72906400  |
| C  | -7.10835700 | -0.25925200 | -0.01898800 |
| H  | -6.12327700 | 0.83693400  | -1.58792500 |
| C  | -5.66936800 | -1.54703500 | 1.43889900  |
| H  | -3.56098500 | -1.43965600 | 1.03189600  |
| C  | -6.95097000 | -1.12440600 | 1.06926000  |
| H  | -8.10064000 | 0.06901500  | -0.31793300 |
| H  | -5.53942200 | -2.22029200 | 2.28264000  |
| H  | -7.82071800 | -1.47130000 | 1.62129700  |
| C  | -2.70863200 | 1.89030800  | -0.46130000 |
| C  | -1.95640100 | 2.83851100  | -1.17837900 |
| C  | -2.99621200 | 2.14038400  | 0.89097500  |
| C  | -1.48868300 | 3.99974000  | -0.55526600 |
| H  | -1.73467500 | 2.67025000  | -2.23013000 |
| C  | -2.53834600 | 3.30746000  | 1.51180600  |
| H  | -3.57746800 | 1.42604400  | 1.46658200  |
| C  | -1.78186700 | 4.23846200  | 0.79178000  |
| H  | -0.90541500 | 4.71968500  | -1.12373800 |
| H  | -2.77141600 | 3.48647900  | 2.55854800  |
| H  | -1.42755200 | 5.14502200  | 1.27564000  |

Filename: Water\_CuCO2MeSO3PPH3  
Sum of electronic and zero-point Energies = -56745.3451

$[(\text{MeCO}_2)\text{Ag}(\text{O}_3\text{SC}_6\text{H}_4\text{PPh}_2)]^-$

|    |             |             |             |
|----|-------------|-------------|-------------|
| P  | 4.02398200  | 0.13561800  | 1.37161500  |
| C  | 2.42952900  | -0.78616700 | 1.14146300  |
| C  | 1.34365100  | -0.29898600 | 0.39721000  |
| C  | 2.29840700  | -2.02195200 | 1.79820600  |
| C  | 0.16845700  | -1.04889300 | 0.31750500  |
| H  | 1.40895500  | 0.65103800  | -0.12051100 |
| C  | 1.12148200  | -2.76941200 | 1.69867400  |
| H  | 3.12317100  | -2.40809600 | 2.39297900  |
| C  | 0.04155400  | -2.28530100 | 0.95817700  |
| H  | 1.04072000  | -3.72541000 | 2.20826200  |
| H  | -0.87714500 | -2.85931700 | 0.88736700  |
| S  | -1.22590900 | -0.42442300 | -0.63539500 |
| O  | -0.80913900 | 0.86288000  | -1.25738400 |
| O  | -2.32127300 | -0.22297700 | 0.41073600  |
| O  | -1.60385300 | -1.48191600 | -1.61910100 |
| O  | -7.05630700 | 0.66615700  | 1.30116000  |
| O  | -6.51583200 | -0.09803200 | -0.74606800 |
| C  | -7.36722100 | 0.30731500  | 0.13789500  |
| C  | -8.81796200 | 0.32017100  | -0.31293700 |
| H  | -9.46980500 | 0.74024300  | 0.45641800  |
| H  | -8.91872900 | 0.90326100  | -1.23500200 |
| H  | -9.14030300 | -0.70365200 | -0.53681300 |
| C  | 5.14969800  | -0.70699600 | 0.16490800  |
| C  | 6.53292300  | -0.54167500 | 0.36228200  |
| C  | 4.71232500  | -1.50461100 | -0.90617800 |
| C  | 7.45588400  | -1.14008100 | -0.50105200 |
| H  | 6.89269500  | 0.05729100  | 1.19633100  |
| C  | 5.63574300  | -2.11318000 | -1.76328200 |
| H  | 3.65045200  | -1.65497200 | -1.07870000 |
| C  | 7.00853500  | -1.92958400 | -1.56607600 |
| H  | 8.52076200  | -0.99772100 | -0.33505300 |
| H  | 5.28050700  | -2.72713200 | -2.58726900 |
| H  | 7.72417100  | -2.40241300 | -2.23376400 |
| C  | 3.67846300  | 1.76509800  | 0.56069500  |
| C  | 3.12915800  | 2.77735000  | 1.36923900  |
| C  | 3.95724400  | 2.05481200  | -0.78541000 |
| C  | 2.84444900  | 4.03981300  | 0.84053500  |
| H  | 2.92099500  | 2.57923300  | 2.41866800  |
| C  | 3.68521400  | 3.32275000  | -1.31140700 |
| H  | 4.38662700  | 1.29379100  | -1.43061300 |
| C  | 3.12516600  | 4.31679600  | -0.50223900 |
| H  | 2.41419200  | 4.80736300  | 1.47888100  |
| H  | 3.90883200  | 3.53027300  | -2.35497700 |
| H  | 2.91372700  | 5.30069900  | -0.91299700 |
| Ag | -4.44404200 | -0.12724400 | -0.12606600 |

Filename: Water\_AgCO2MeSO3PPH3  
Sum of electronic and zero-point Energies = -55374.6852

$[(\text{MeCO}_2)\text{Au}(\text{O}_3\text{SC}_6\text{H}_4\text{PPh}_2)]^-$

|    |             |             |             |
|----|-------------|-------------|-------------|
| P  | 4.21364900  | 0.39868100  | 1.38502300  |
| C  | 2.84762900  | -0.84209900 | 1.18493400  |
| C  | 1.72415000  | -0.64921800 | 0.56917600  |
| C  | 2.94048600  | -2.02619500 | 1.93935500  |
| C  | 0.72951900  | -1.63114600 | 0.32200400  |
| H  | 1.62447300  | 0.25121600  | -0.22739800 |
| C  | 1.94536000  | -3.00340300 | 1.87306900  |
| H  | 3.79907800  | -0.55853700 | 2.58758300  |
| C  | 0.82216900  | -2.81057400 | 1.06404000  |
| H  | 2.03732700  | -3.91347800 | 2.45892900  |
| H  | 0.04109000  | -3.56169900 | 1.01473200  |
| S  | -0.72513400 | -1.34708300 | -0.69418800 |
| O  | -0.31477200 | -0.55883200 | -1.88542900 |
| O  | -1.61401700 | -0.50310500 | 0.25345800  |
| O  | -1.34347600 | -2.66325100 | -0.99784900 |
| O  | -5.96010900 | 1.32076100  | 1.39622200  |
| O  | -5.62909600 | 0.21913600  | -0.54915400 |
| C  | -6.36641100 | 0.87837600  | 0.30348100  |
| C  | -7.79232000 | 1.10199800  | -0.15934700 |
| H  | -8.43365800 | 1.37209000  | 0.68266400  |
| H  | -7.80173300 | 1.92512100  | -0.88510400 |
| H  | -8.18706900 | -0.21342400 | -0.66057800 |
| C  | 5.48092800  | -0.20164700 | 0.17513300  |
| C  | 6.79882200  | 0.25676500  | 0.35458100  |
| C  | 5.21297000  | -1.08897500 | -0.88081500 |
| C  | 7.81985300  | -0.14378900 | -0.51252300 |
| H  | 7.03027100  | 0.93104100  | 1.17649300  |
| C  | 6.23699800  | -1.50012300 | -1.74100000 |
| H  | 4.20515700  | -1.46194400 | -1.03909300 |
| C  | 7.54105100  | -1.02613100 | -1.56224900 |
| H  | 8.83155100  | 0.22427000  | -0.36172500 |
| H  | 6.01313400  | -2.18768400 | -2.55288500 |
| H  | 8.33486700  | -1.34644900 | -2.23211600 |
| C  | 3.52113200  | 1.90812500  | 0.56400200  |
| C  | 2.72999100  | 2.75976000  | 1.35776100  |
| C  | 3.77043900  | 2.26979800  | -0.77005100 |
| C  | 2.18332300  | 3.93069300  | 0.82546300  |
| H  | 2.53851400  | 2.50670500  | 2.39856800  |
| C  | 3.23489300  | 3.44973700  | -1.29927200 |
| H  | 4.38282100  | 1.63467700  | -1.40335200 |
| C  | 2.43763500  | 4.28057700  | -0.50574000 |
| H  | 1.56938600  | 4.57269100  | 1.45210000  |
| H  | 3.43943700  | 3.71547800  | -2.33345800 |
| H  | 2.02178100  | 5.19586100  | -0.91892100 |
| Au | -3.63378400 | -0.13045000 | -0.15158000 |

Filename: Water\_AuCO2MeSO3PPH3  
Sum of electronic and zero-point Energies = -55068.6199

**Figure S57:** Cartesian coordinates and energies (eV) for  $[(\text{MeCO}_2)\text{M}(\text{PPh}_2\text{C}_6\text{H}_4\text{SO}_3)]^-$  in water bound through O.

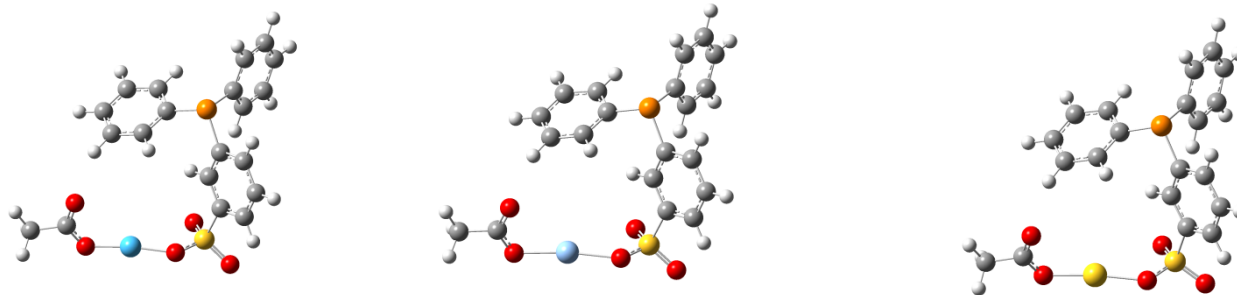

$[(\text{MeCO}_2)\text{Cu}(\text{O}_3\text{SC}_6\text{H}_4\text{PPh}_2)]^-$

|    |             |             |             |
|----|-------------|-------------|-------------|
| Cu | -3.60608900 | -0.55580400 | -0.23880300 |
| P  | 2.65245900  | 0.68376200  | 1.39986800  |
| C  | 1.68714400  | -0.89453200 | 1.25852900  |
| C  | 0.66325700  | -1.12968900 | 0.32657200  |
| C  | 2.01523900  | -1.91268000 | 2.17091700  |
| C  | -0.00719300 | -2.35426300 | 0.31579200  |
| H  | 0.37373200  | -0.36985600 | -0.39206000 |
| H  | 1.35530600  | -3.14416300 | 2.13807400  |
| H  | 2.79225700  | -1.73656700 | 2.91225300  |
| C  | 0.33553400  | -3.36996300 | 1.21070500  |
| H  | 1.62768000  | -3.92429700 | 2.84562700  |
| H  | -0.19437300 | -4.31636700 | 1.16984200  |
| S  | -1.38045800 | -2.61086800 | -0.84142800 |
| O  | -1.10540000 | -1.75760400 | -2.01666600 |
| O  | -2.59196800 | -2.12399500 | -0.02884600 |
| O  | -1.46008600 | -4.06956900 | -1.06084300 |
| O  | -3.78929800 | 2.26308400  | 1.04220100  |
| O  | -4.79962600 | 0.85871000  | -0.42136700 |
| C  | -4.68244000 | 1.97212300  | 0.23290100  |
| C  | -5.79724800 | 2.97489100  | -0.08142100 |
| H  | -5.65988300 | 3.89629500  | 0.49063700  |
| H  | -5.80123100 | 3.20317400  | -1.15411800 |
| H  | -6.77284800 | 2.53464400  | 0.15777400  |
| C  | 3.99118800  | 0.44196800  | 0.12808900  |
| C  | 5.27099300  | 0.93208900  | 0.43438900  |
| C  | 3.79836700  | -0.20521200 | -1.10459800 |
| C  | 6.33083400  | 0.79338300  | -0.46927300 |
| H  | 5.43756500  | 1.42439700  | 1.39035500  |
| C  | 4.85566900  | -0.35153400 | -2.00560500 |
| H  | 2.81970000  | -0.59955600 | -1.36298300 |
| C  | 6.12460200  | 0.14920700  | -1.69177200 |
| H  | 7.31435500  | 1.18253300  | -0.21460400 |
| H  | 4.68692800  | -0.85677000 | -2.95379400 |
| H  | 6.94637900  | 0.03381200  | -2.39505800 |
| C  | 1.55313700  | 1.92996300  | 0.58221000  |
| C  | 0.21668600  | 2.04929400  | 1.00650900  |
| C  | 2.03965800  | 2.85077300  | -0.36083000 |
| C  | -0.62463400 | 3.03258100  | 0.48065900  |
| H  | -0.19254300 | 1.35026500  | 1.73173600  |
| C  | 1.20709200  | 3.85266200  | -0.87092800 |
| H  | 3.06577900  | 2.78268700  | -0.71143900 |
| H  | -0.12484000 | 3.94205800  | -0.45809300 |
| C  | -1.66867600 | 3.05477200  | 0.78418000  |
| H  | 1.60033100  | 4.55146500  | -1.60686700 |
| H  | -0.77720200 | 4.70639700  | -0.87414800 |

Filename: CuCO2MeSO3PPh3\_2  
 Sum of electronic and zero-point Energies = -56742.5792

$[(\text{MeCO}_2)\text{Ag}(\text{O}_3\text{SC}_6\text{H}_4\text{PPh}_2)]^-$

|    |             |             |             |
|----|-------------|-------------|-------------|
| P  | 2.92616600  | 0.73087700  | 1.39688400  |
| C  | 2.04278800  | -0.89327900 | 1.23876800  |
| C  | 0.99700500  | -1.15230600 | 0.33842100  |
| C  | 2.45475800  | -1.91934200 | 2.10754200  |
| C  | 0.38264200  | -2.40638000 | 0.31730000  |
| H  | 0.64849500  | -0.38854600 | -0.34909700 |
| C  | 1.85374400  | -3.17999400 | 2.06148500  |
| H  | 3.25051200  | -1.72666400 | 2.82457600  |
| C  | 0.80859100  | -3.42828200 | 1.16818500  |
| H  | 2.19095000  | -3.96609000 | 2.73703000  |
| H  | 0.32198200  | -4.39741400 | 1.12054700  |
| S  | -1.03340800 | -2.68916000 | -0.78267800 |
| O  | -0.84079400 | -1.79635300 | -1.94821200 |
| O  | -2.21919900 | -2.25750300 | 0.08624800  |
| O  | -1.06174200 | -4.14458500 | -1.04177100 |
| O  | -3.66583100 | 2.28388300  | 1.07316500  |
| O  | -4.80774900 | 1.07914400  | -0.46058100 |
| C  | -4.59828300 | 2.12666900  | 0.26574800  |
| C  | -5.63266100 | 3.23898900  | 0.05919800  |
| H  | -5.42198600 | 4.08965100  | 0.71271800  |
| H  | -5.62030700 | 3.56682900  | -0.98727900 |
| H  | -6.63897700 | 2.85521100  | 0.26518700  |
| C  | 4.27595400  | 0.56984200  | 0.12562100  |
| C  | 5.51252200  | 1.17012200  | 0.41403500  |
| C  | 4.13341100  | -0.12094900 | -1.09011900 |
| C  | 6.57704500  | 1.09756400  | -0.49149000 |
| H  | 5.64178600  | 1.69647500  | 1.35761000  |
| C  | 5.19648400  | -0.20116500 | -1.99293600 |
| H  | 3.18927800  | -0.60000500 | -1.33387600 |
| C  | 6.42057900  | 0.40989300  | -1.69780900 |
| H  | 7.52627800  | 1.57146700  | -0.25074000 |
| H  | 5.06697200  | -0.74105200 | -2.92813200 |
| H  | 7.24688200  | 0.34563000  | -2.40230600 |
| C  | 1.76290700  | 1.92529000  | 0.58977000  |
| C  | 0.44357600  | 2.01728300  | 1.07210600  |
| C  | 2.17491900  | 2.82624800  | -0.40557400 |
| C  | -0.45435100 | 2.95147400  | 0.55087600  |
| H  | 0.09504900  | 1.33204000  | 1.84141400  |
| C  | 1.28626900  | 3.78170600  | -0.91109900 |
| H  | 3.18599200  | 2.77862800  | -0.79984400 |
| C  | -0.02798800 | 3.84167700  | -0.44163700 |
| H  | -1.48581500 | 2.95603900  | 0.89592500  |
| H  | 1.62196100  | 4.46609300  | -1.68786500 |
| H  | -0.72499500 | 4.56765500  | -0.85371500 |
| Ag | -3.41168000 | -0.50189500 | -0.21128500 |

Filename: AgCO2MeSO3PPh3\_6  
 Sum of electronic and zero-point Energies = -55372.1081

$[(\text{MeCO}_2)\text{Au}(\text{O}_3\text{SC}_6\text{H}_4\text{PPh}_2)]^-$

|    |             |             |             |
|----|-------------|-------------|-------------|
| P  | 3.29856500  | 0.71727100  | 1.39309300  |
| C  | 2.30876600  | -0.85015700 | 1.31569300  |
| C  | 1.28394000  | -1.11215100 | 0.39055700  |
| C  | 2.62451600  | -1.83330100 | 2.26929700  |
| C  | 0.60867200  | -2.33366800 | 0.42270200  |
| H  | 1.00231900  | -0.37714500 | -0.35665500 |
| C  | 1.95267600  | -3.05884100 | 2.28558100  |
| H  | 3.40202800  | -1.63403000 | 3.00416200  |
| C  | 0.93812400  | -3.31455000 | 1.36134300  |
| H  | 2.21460700  | -3.81154400 | 3.02590500  |
| H  | 0.40438400  | -4.25956100 | 1.35363400  |
| S  | -0.73732500 | -2.65231900 | -0.75093000 |
| O  | -0.46571300 | -1.84209800 | -1.93930900 |
| O  | -1.99646700 | -2.19703600 | 0.02754100  |
| O  | -0.78012100 | -4.11734200 | -0.92600200 |
| O  | -3.16914900 | 2.50162400  | 1.24299100  |
| O  | -4.12739600 | 1.30721700  | -0.43530300 |
| C  | -3.98822800 | 2.35161400  | 0.33155900  |
| C  | -4.99367100 | 3.45393900  | -0.01321400 |
| H  | -4.82808400 | 4.32983300  | 3.61922900  |
| H  | -4.89854800 | 3.73369300  | -1.06879500 |
| H  | -6.01530400 | 3.08342900  | 0.13310400  |
| C  | 4.59185900  | 0.44277500  | 0.08180600  |
| C  | 5.87820300  | 0.94910300  | 0.32980100  |
| C  | 4.36091000  | -0.23763500 | -1.12597500 |
| C  | 6.90632200  | 0.79478200  | -0.60718600 |
| H  | 6.07479600  | 1.46718300  | 1.26626900  |
| C  | 5.38711300  | -0.40046500 | -2.05971400 |
| H  | 3.37707600  | -0.64485700 | -1.34026000 |
| C  | 6.66211400  | 0.11754700  | -1.80463200 |
| H  | 7.89497100  | 1.19767300  | -0.39777100 |
| H  | 5.18871400  | -0.93141900 | -2.98786300 |
| H  | 7.45925100  | -0.00989300 | -2.53371000 |
| C  | 2.18641300  | 1.96355200  | 0.59431400  |
| C  | 0.86919600  | 2.10700900  | 1.06767100  |
| C  | 2.65030600  | 2.86639000  | -0.37701900 |
| C  | 0.02534300  | 3.10076300  | 0.56672700  |
| H  | 0.47760500  | 1.42082100  | 1.81459500  |
| C  | 1.81438800  | 3.87616200  | -0.86549000 |
| H  | 3.66125600  | 2.77883800  | -0.76528400 |
| C  | 0.50204000  | 3.99274500  | -0.40021800 |
| H  | -1.00376800 | 3.14806100  | 0.91414100  |
| H  | 2.18915300  | 4.56057600  | -1.62417900 |
| H  | -0.15326400 | 4.76488500  | -0.79678900 |
| Au | -2.97761700 | -0.37695900 | -0.19597700 |

Filename: AuCO2MeSO3PPh3\_6  
 Sum of electronic and zero-point Energies = -55066.1144

**Figure S58:** Cartesian coordinates and energies (eV) for  $[(\text{MeCO}_2)\text{M}(\text{PPh}_2\text{C}_6\text{H}_4\text{SO}_3)]^-$  in the gas phase bound through O.
